# Supplementary material for: Efficient syntheses of bolaform surfactants froml-rhamnose and/or 3-(4-hydroxyphenyl)propionic acid
Source: Royal Society of Chemistry journal article supplement (doi:10.1039/c5gc00448a), 2015-01-01
Supplement: c5gc00448a1.pdf [file c5gc00448a1.pdf]

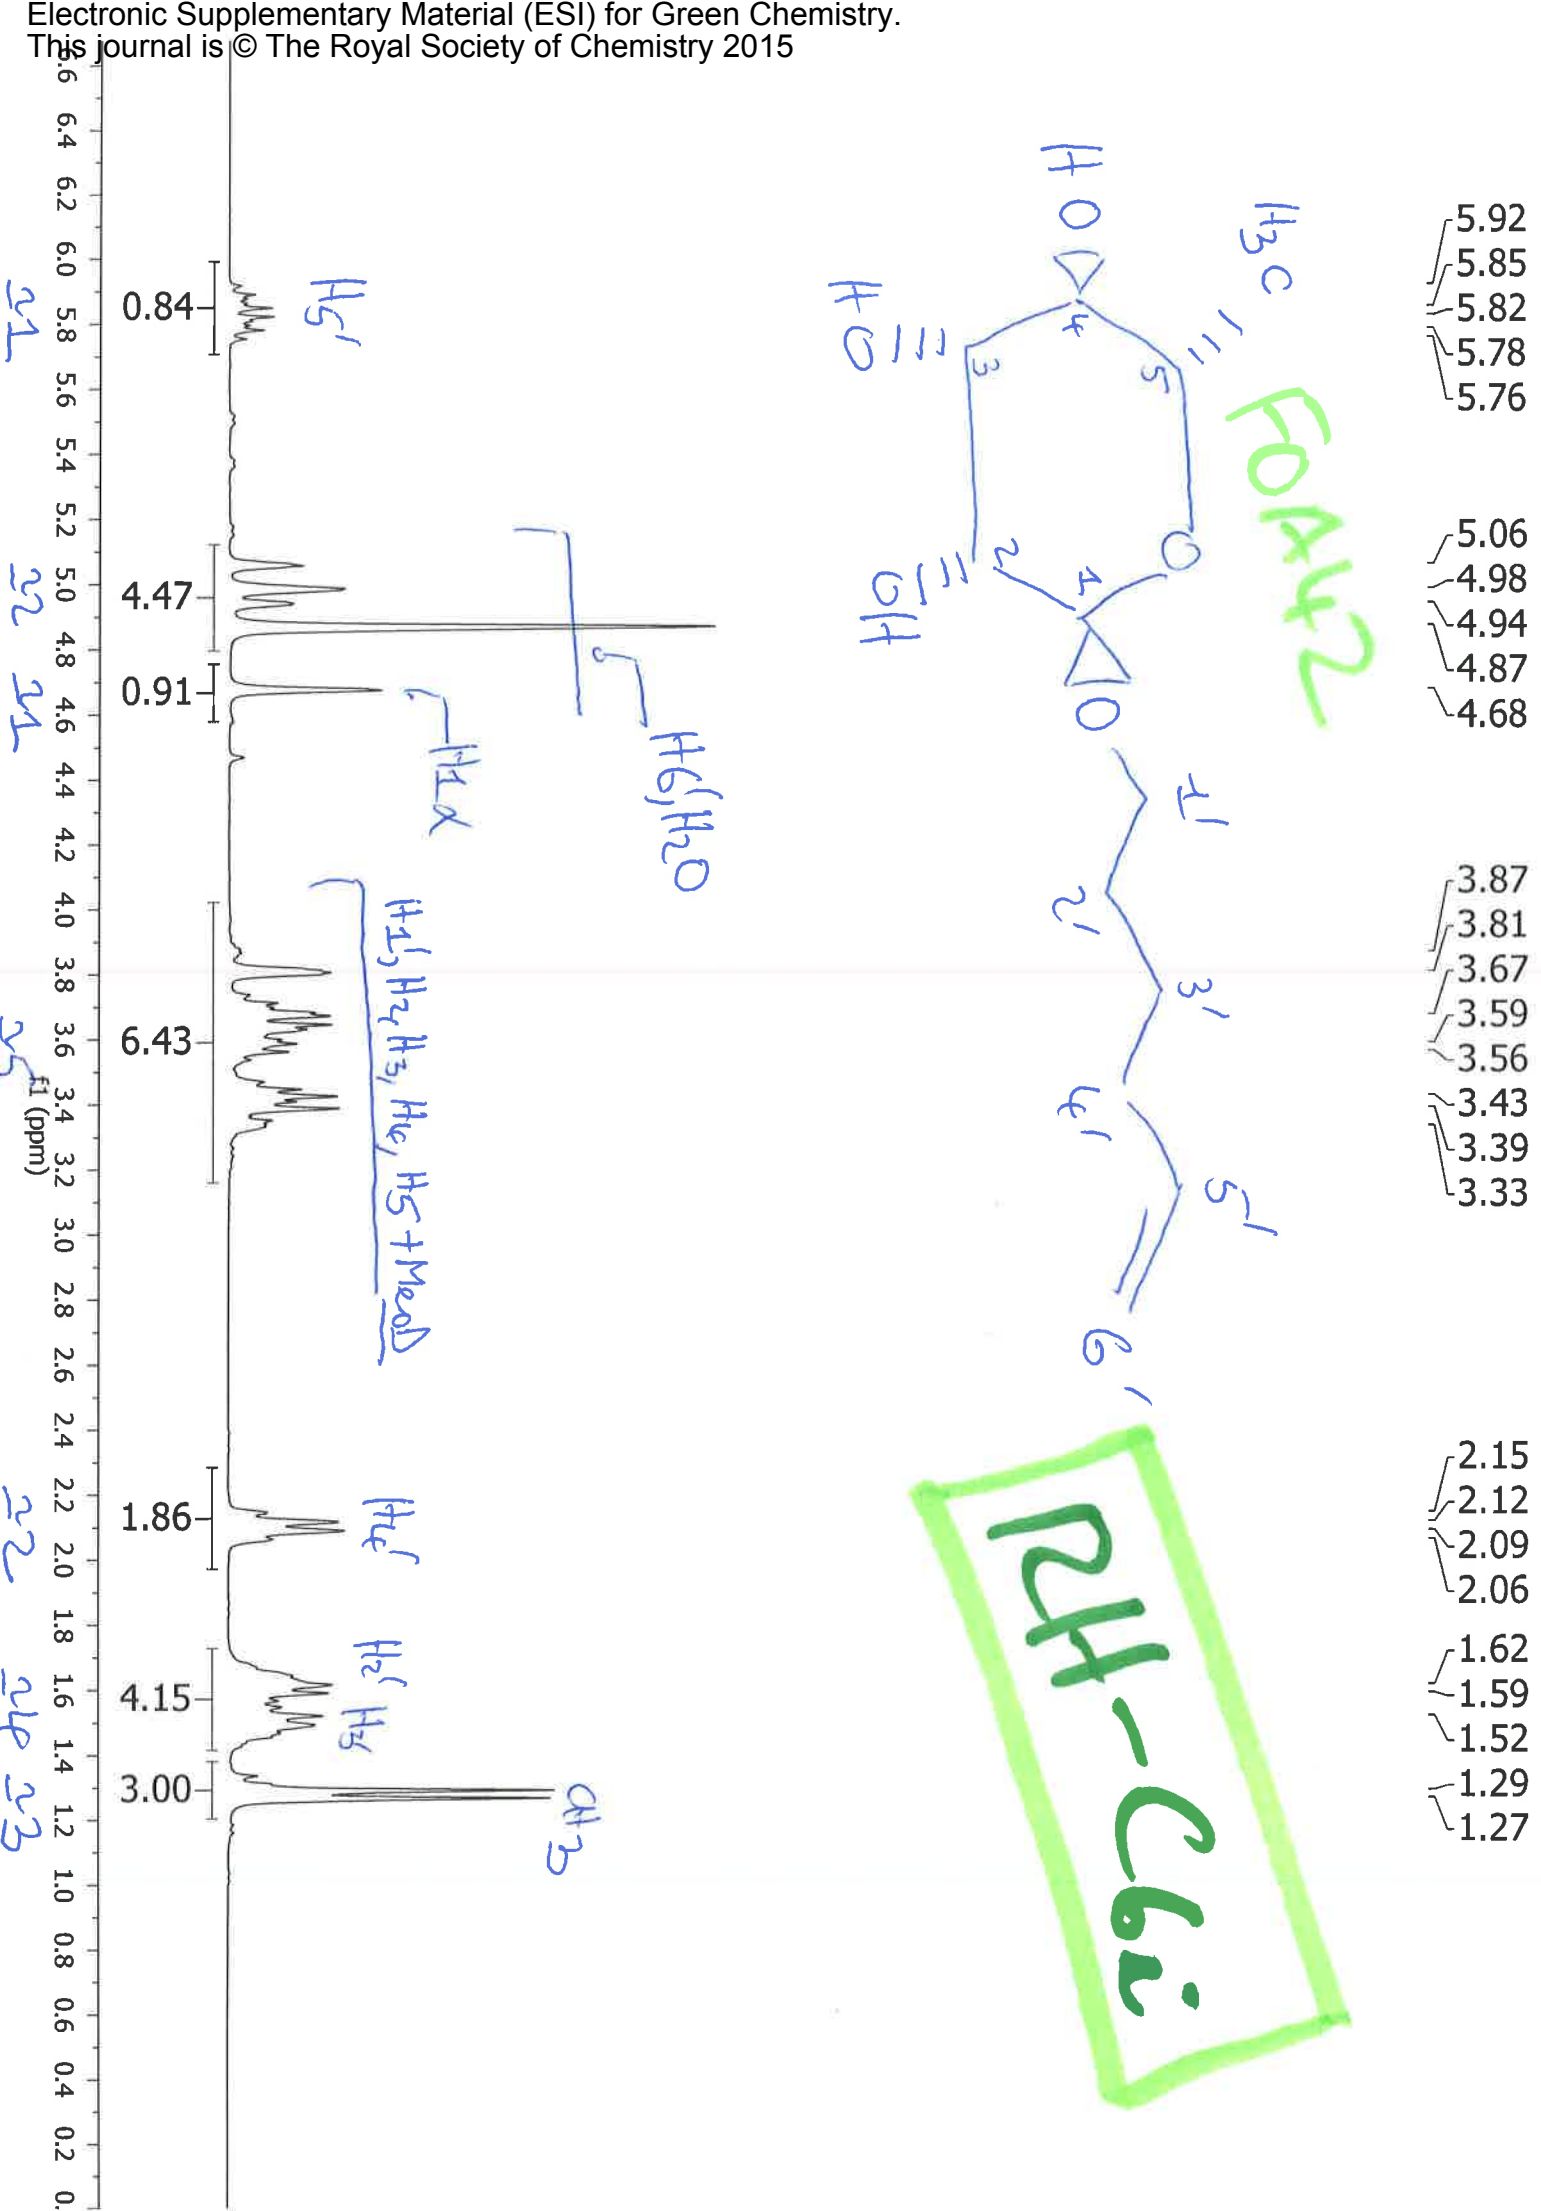

**P4H-C6a**

FOA042...RMN13C ....RH-C6  
produit brun visqueux

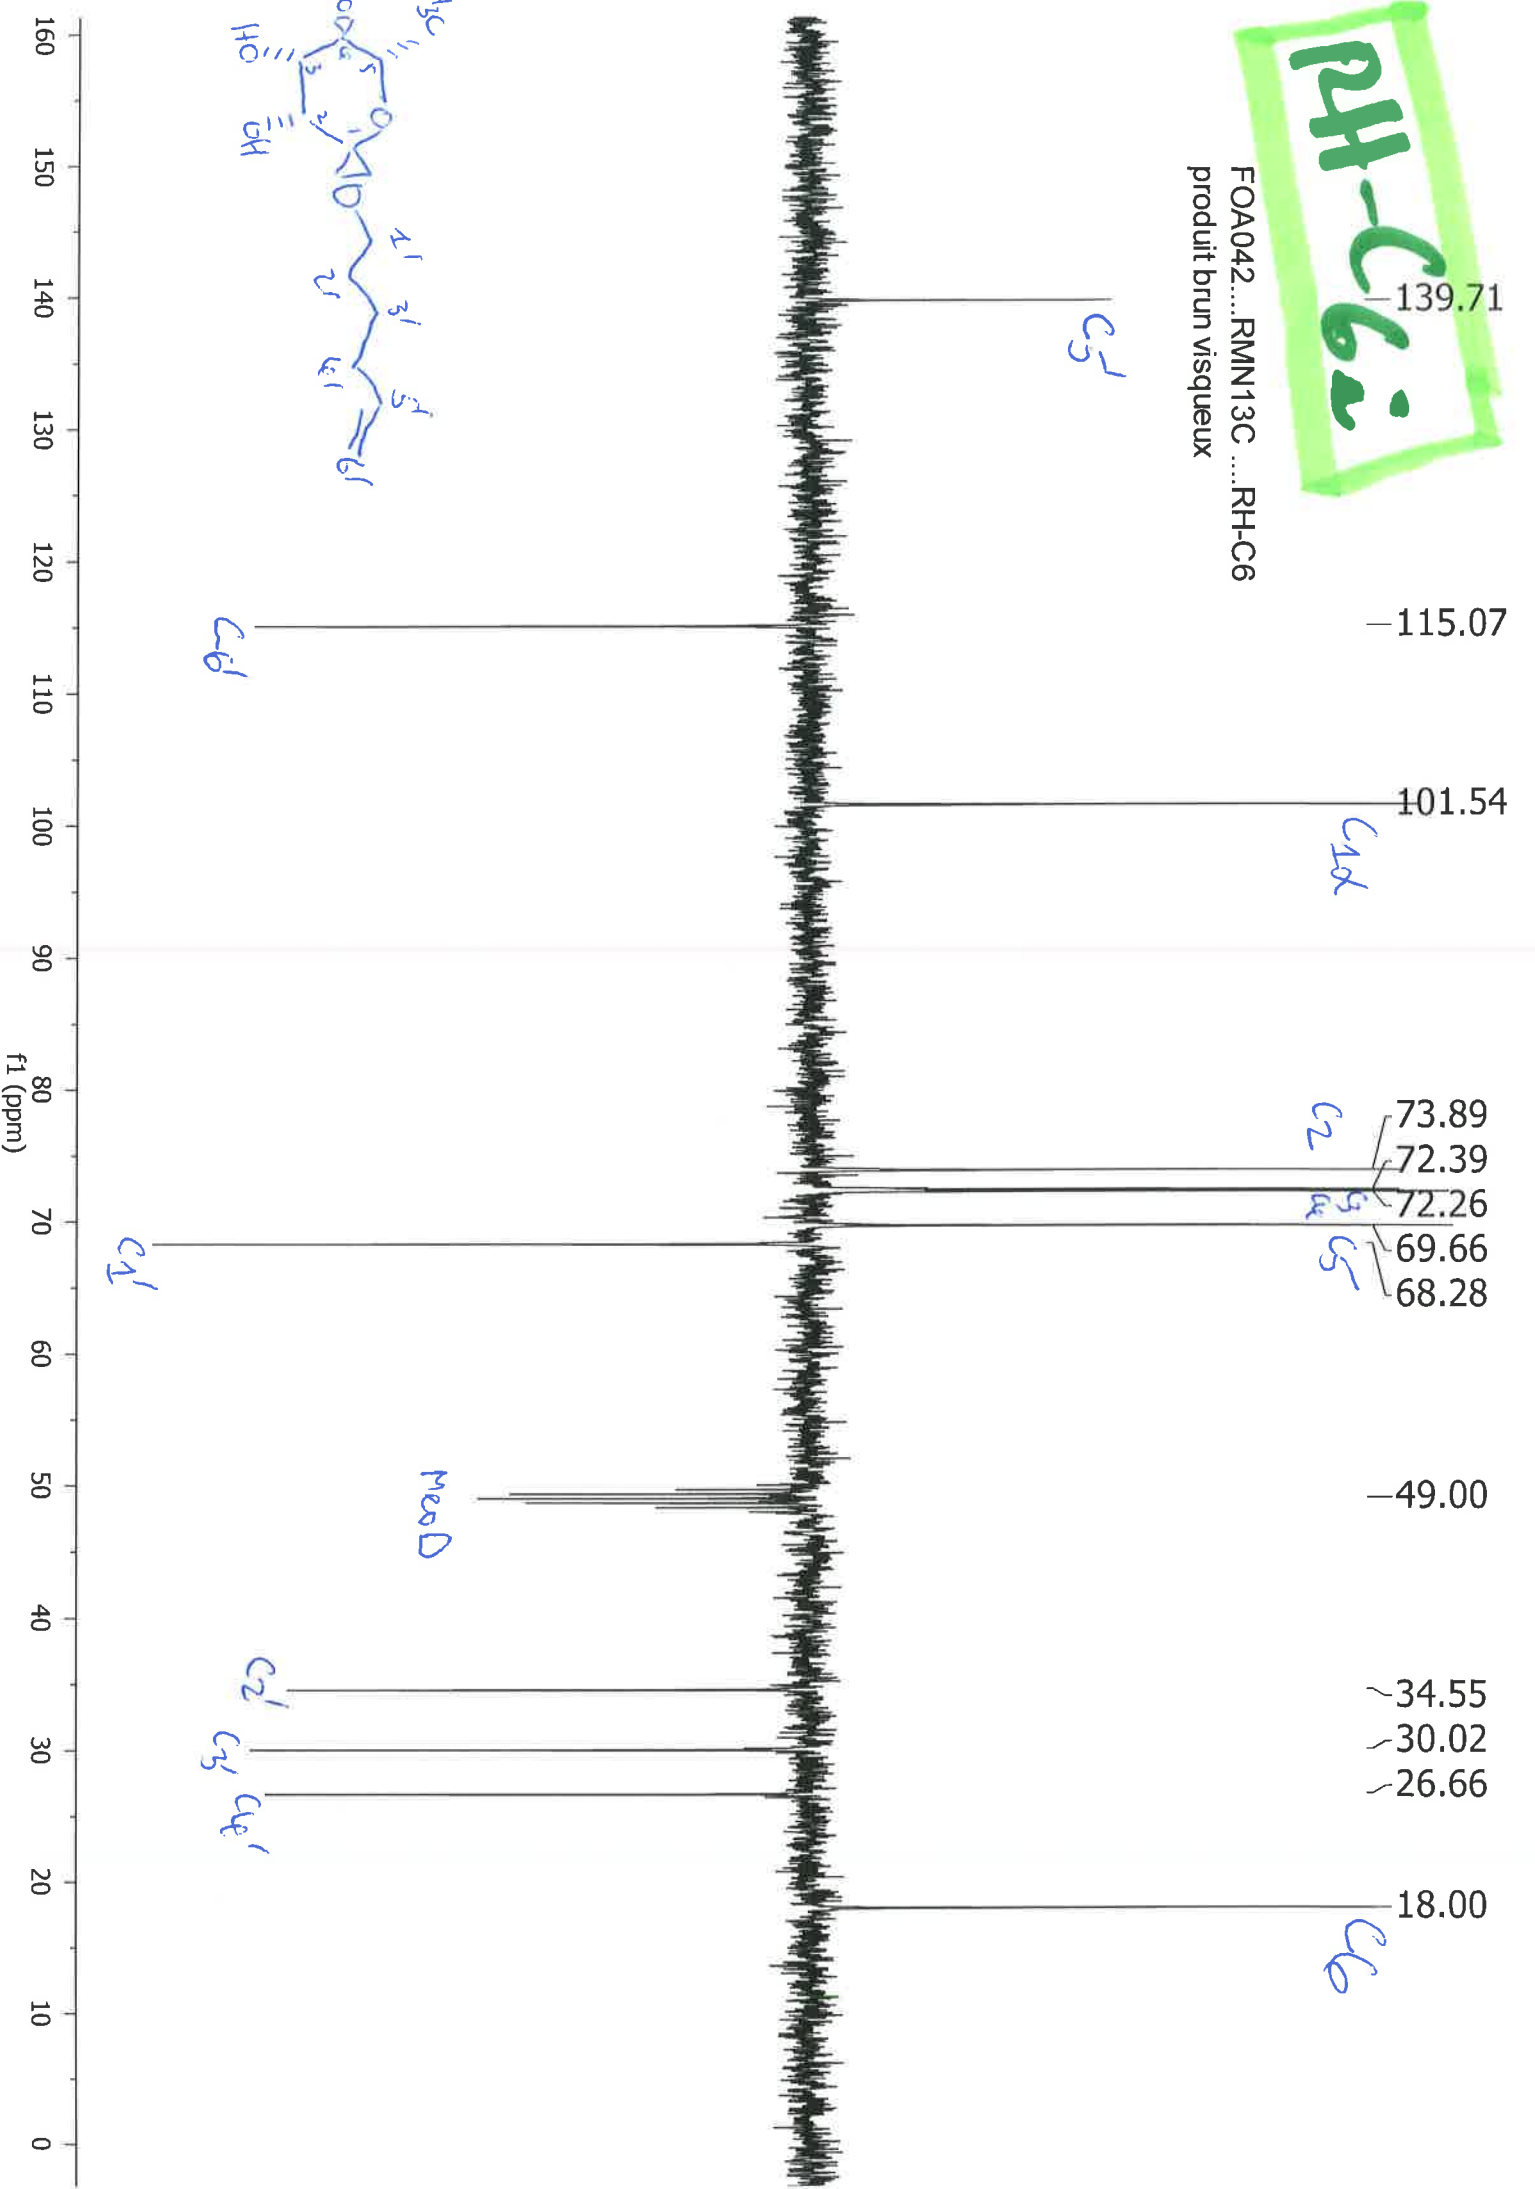

Analyste Administrator  
Date lundi 23 mars 2015 20:35

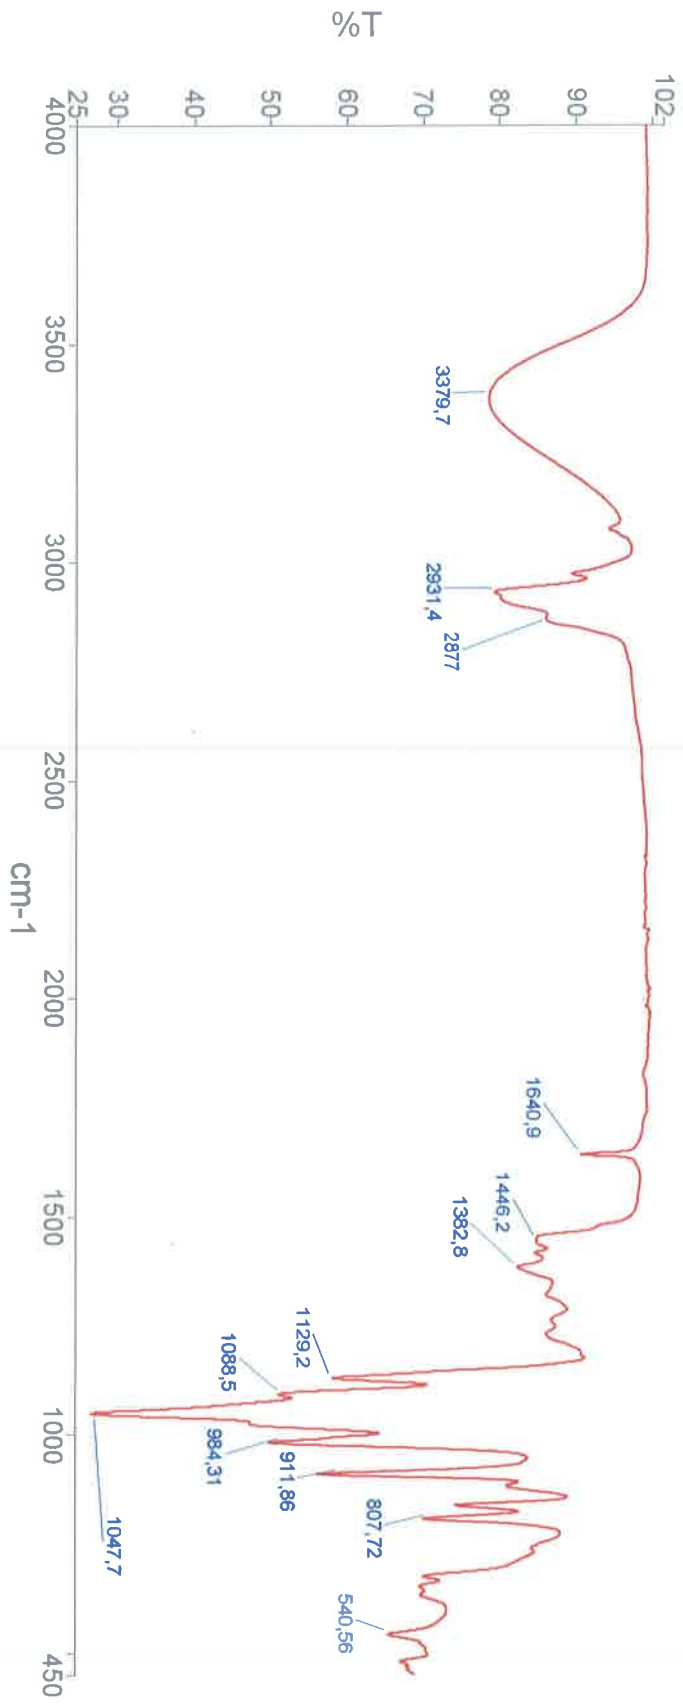

| Nom de l'échantillon | Description                                                | Trajet Optique (mm) |
|----------------------|------------------------------------------------------------|---------------------|
| RHC6i                | Echantillon 001 Par Administrator Date lundi, mars 23 2015 | 1                   |
