# Supplementary material for: Efficient syntheses of bolaform surfactants froml-rhamnose and/or 3-(4-hydroxyphenyl)propionic acid
Source: Royal Society of Chemistry journal article supplement (doi:10.1039/c5gc00448a), 2015-01-01
Supplement: c5gc00448a3.pdf [file c5gc00448a3.pdf]

**RH-C18-RH**

FOA030.002 Produit d'intérêt... RH-C18-RH... obtenu après purification sur colonne  
 ....MeOD... il s'agit de la deuxième tâche

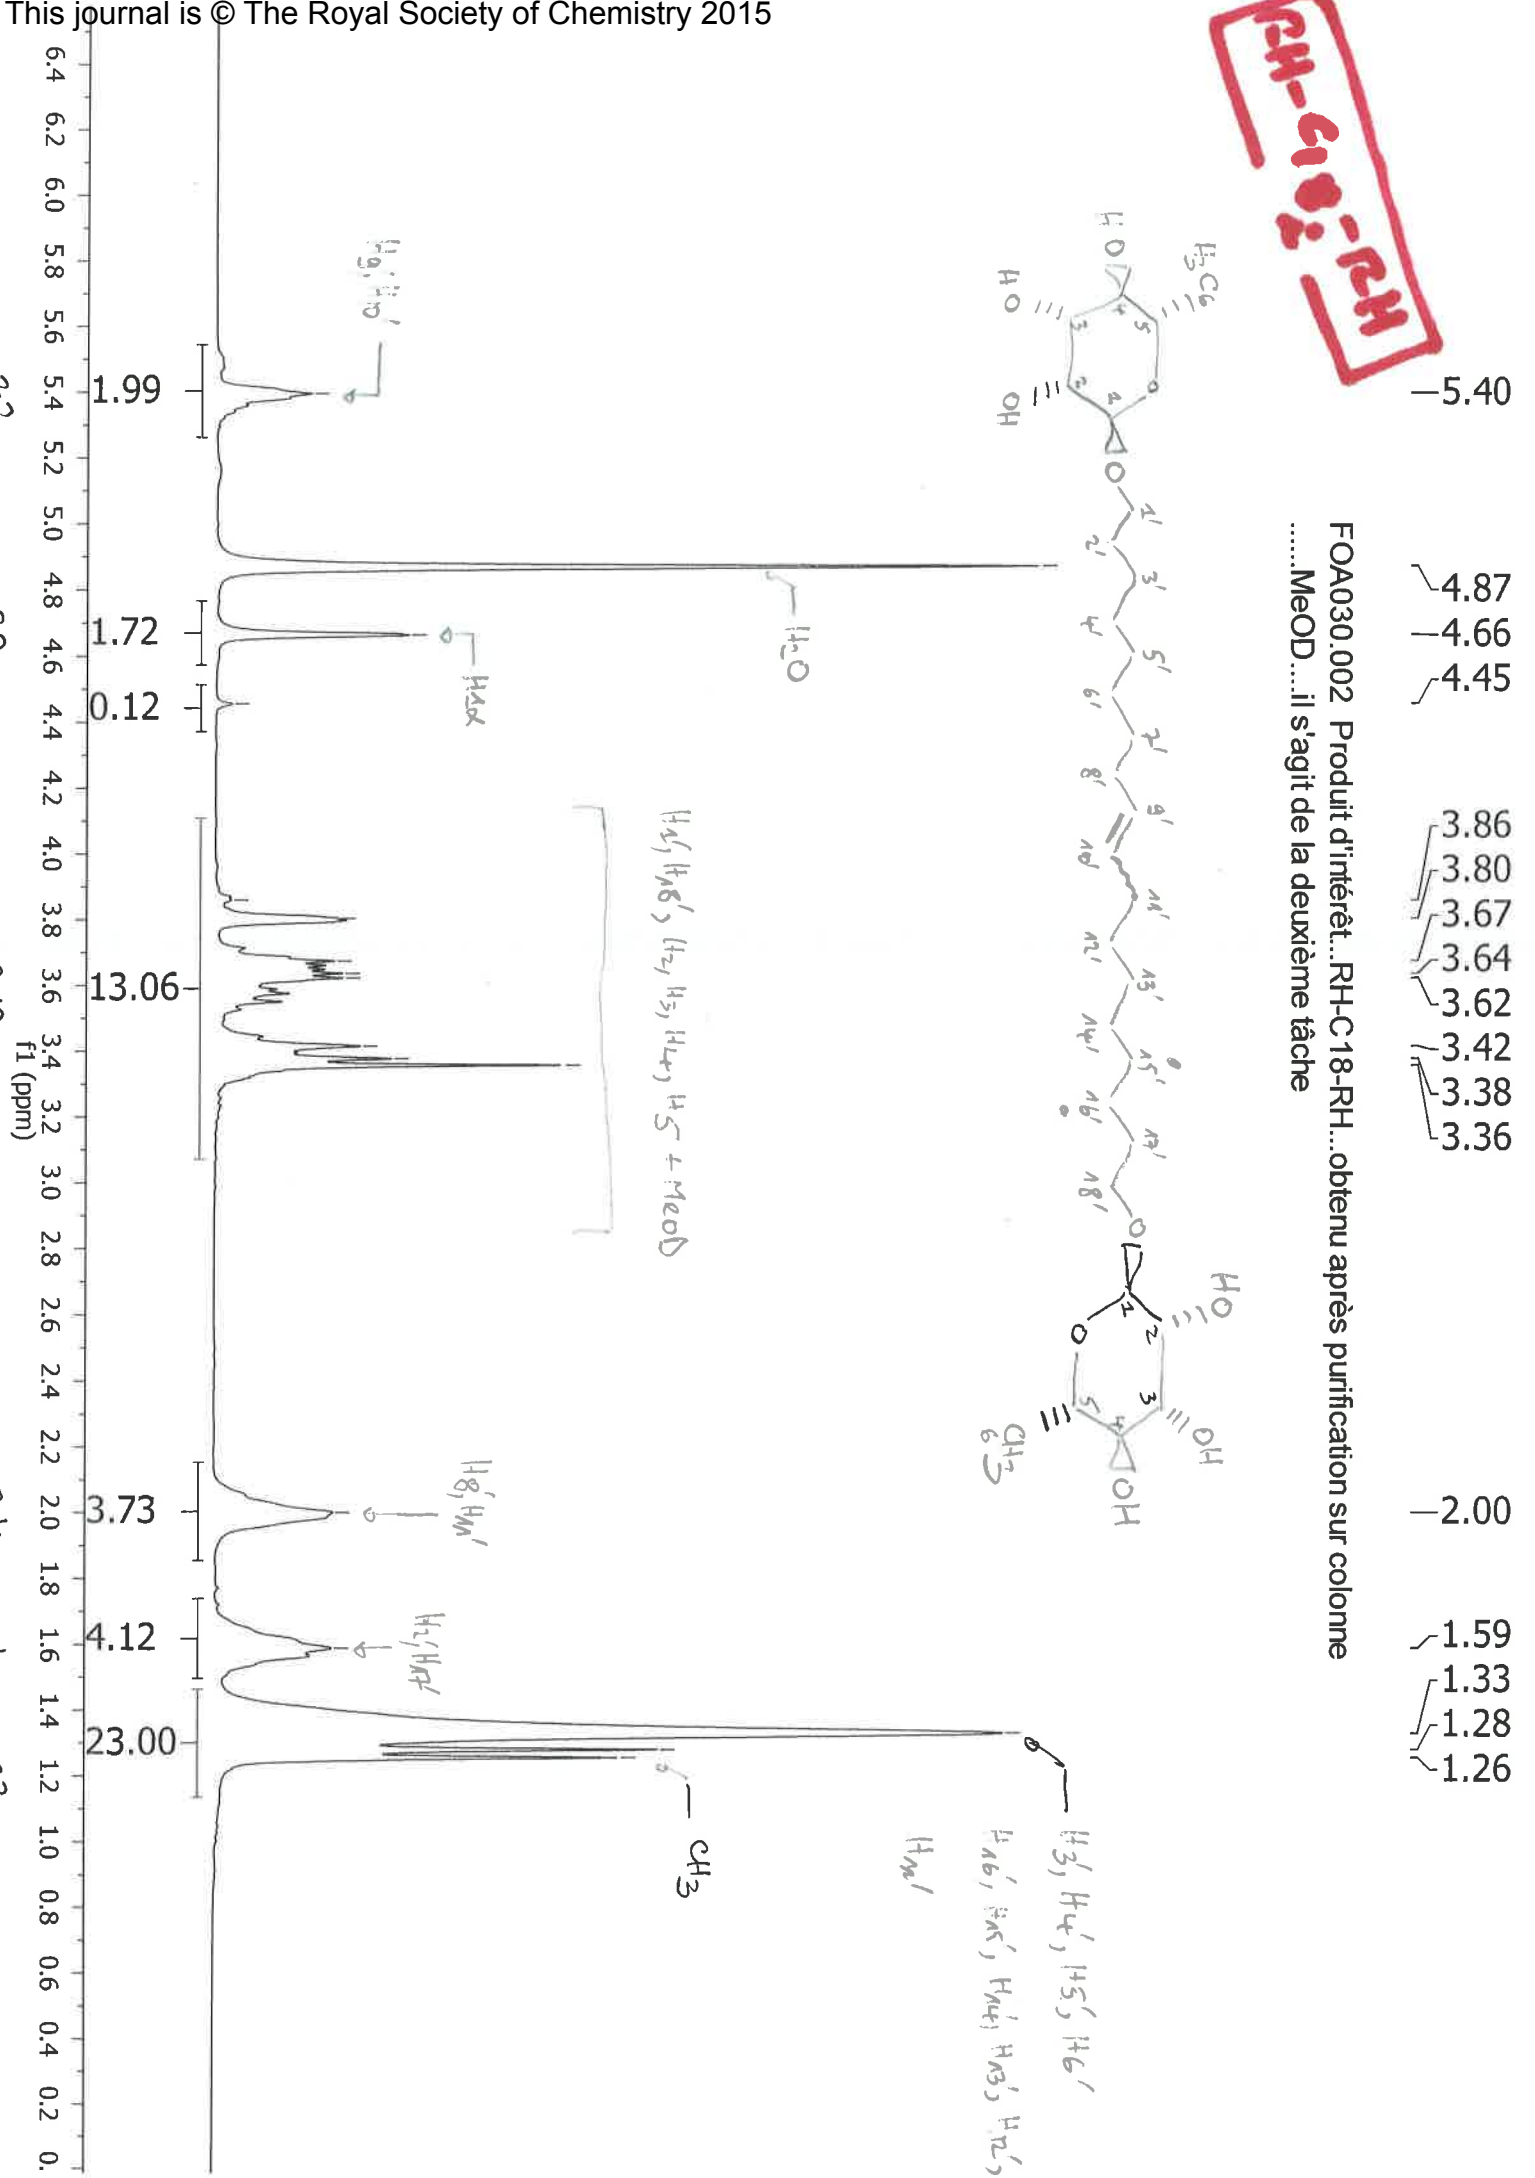

22

22

22

24

24

223

FOA030.002 Produit d'intérêt... RH-C18-RH... obtenu après purification sur colonne  
 ...MeOD... il s'agit de la deuxième tâche

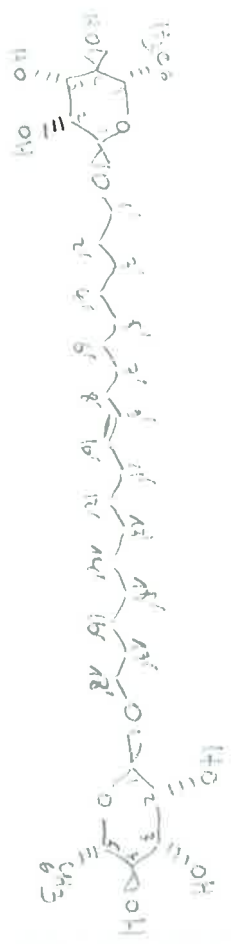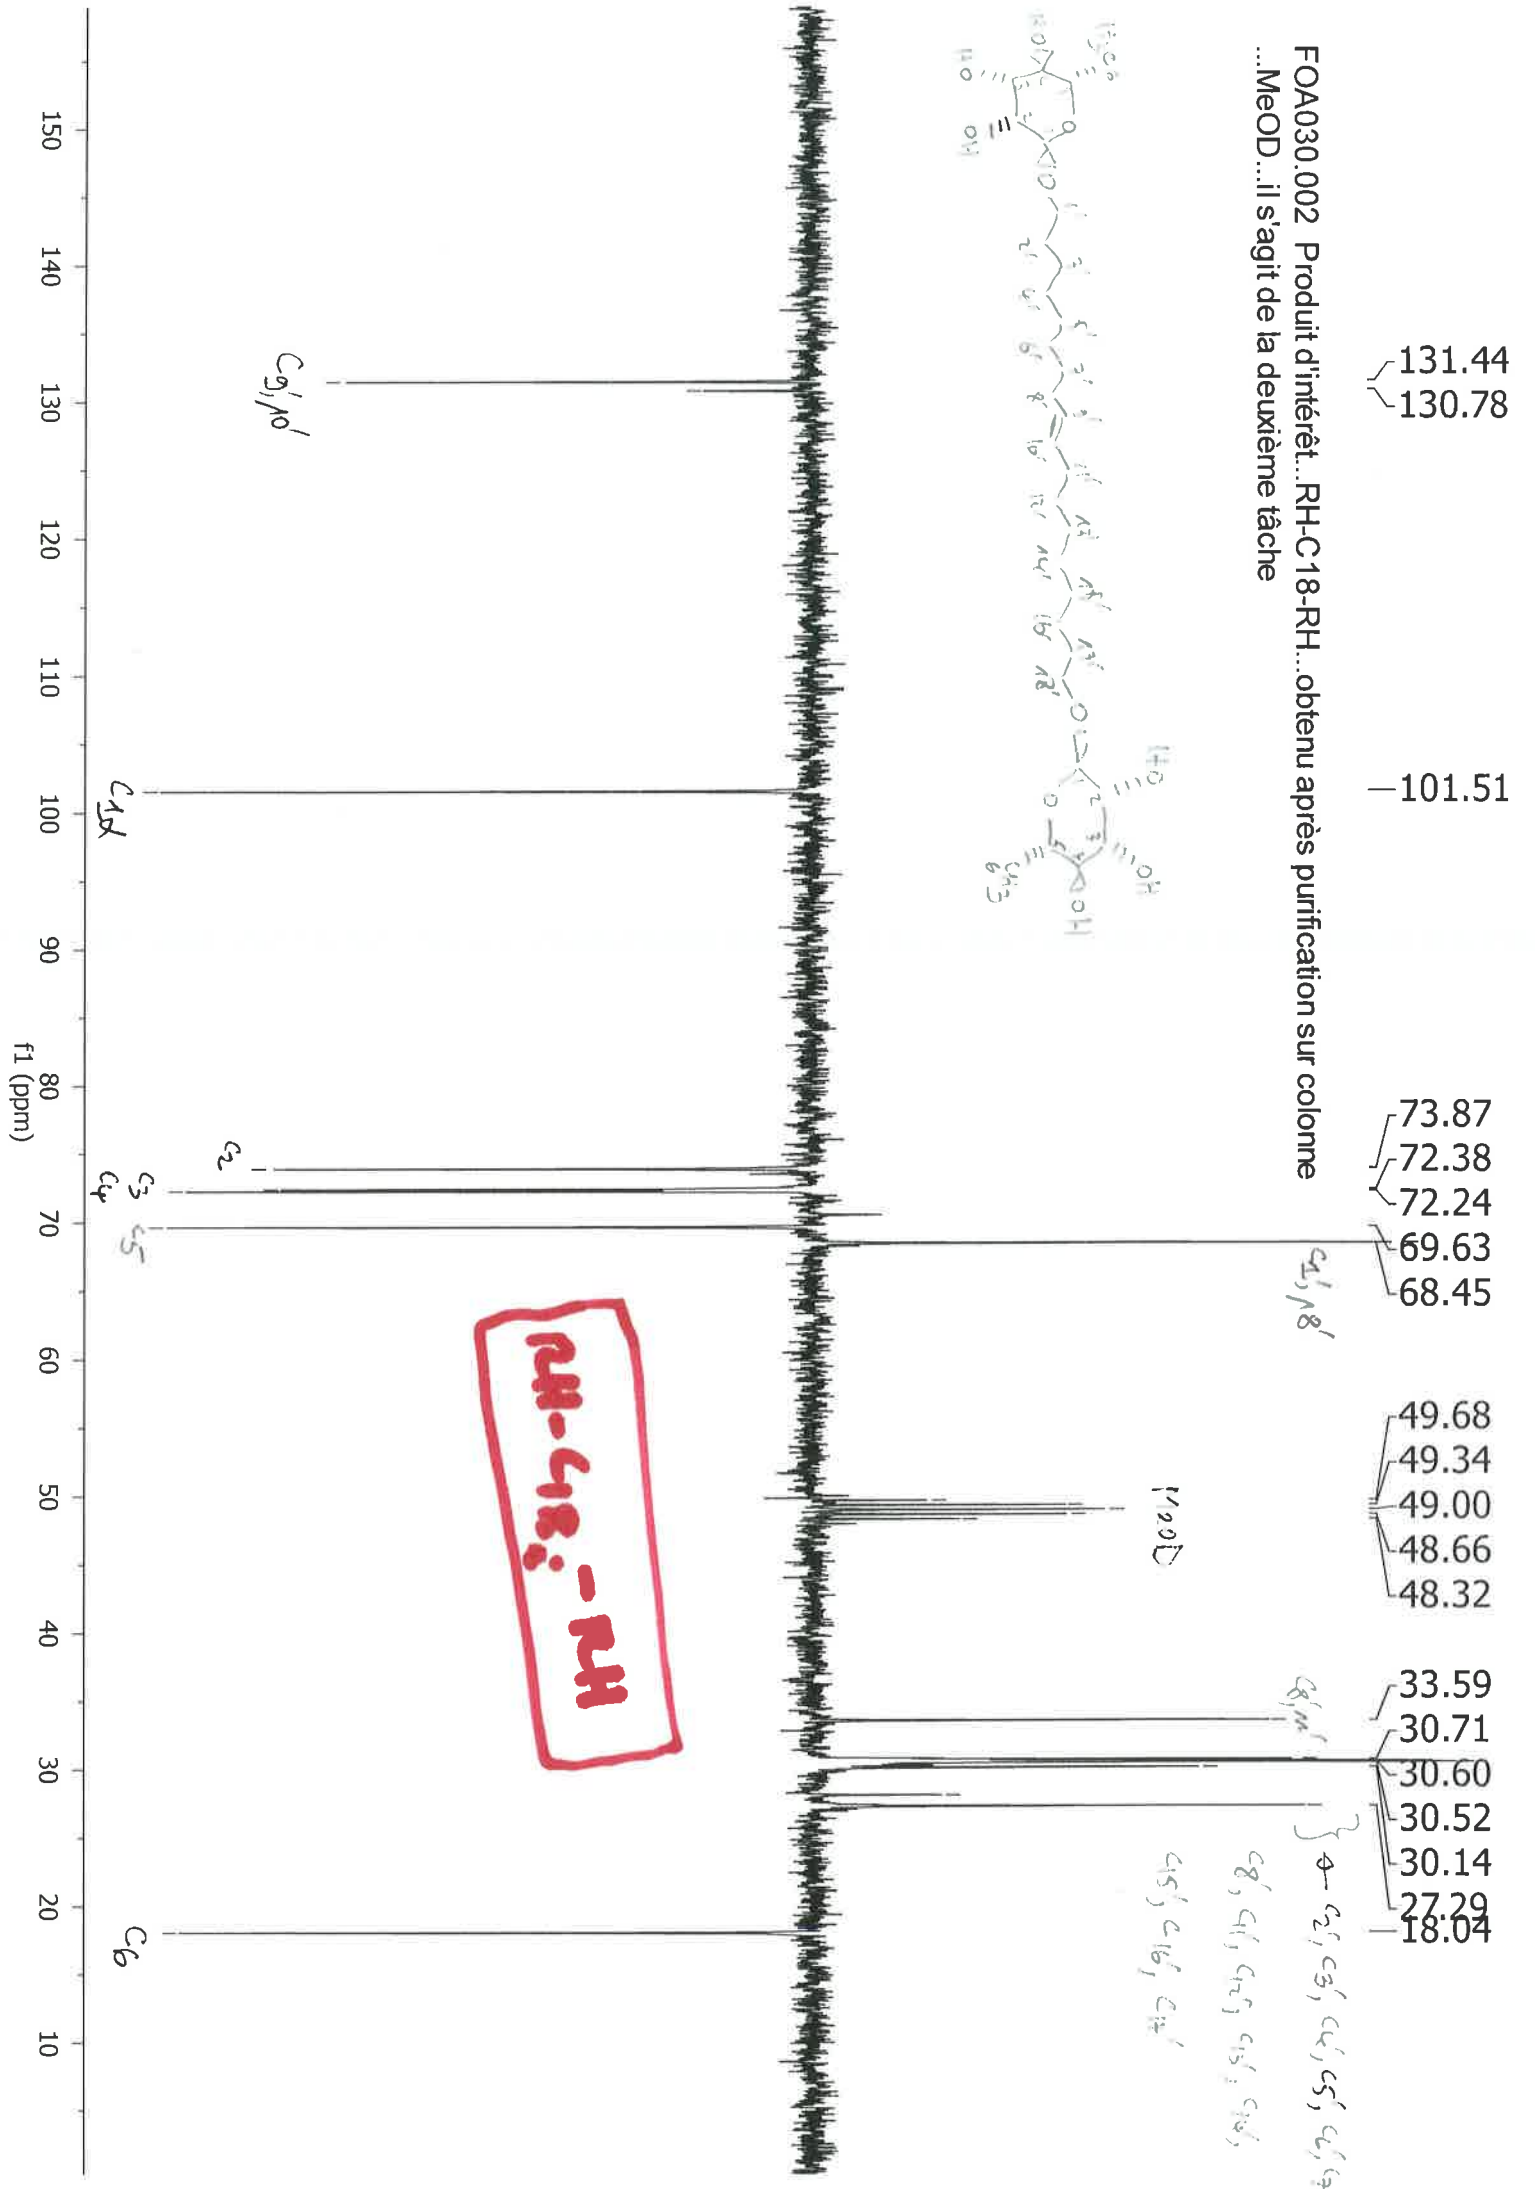

Analyse Administrator  
Date Lundi 23 mars 2015 22:08

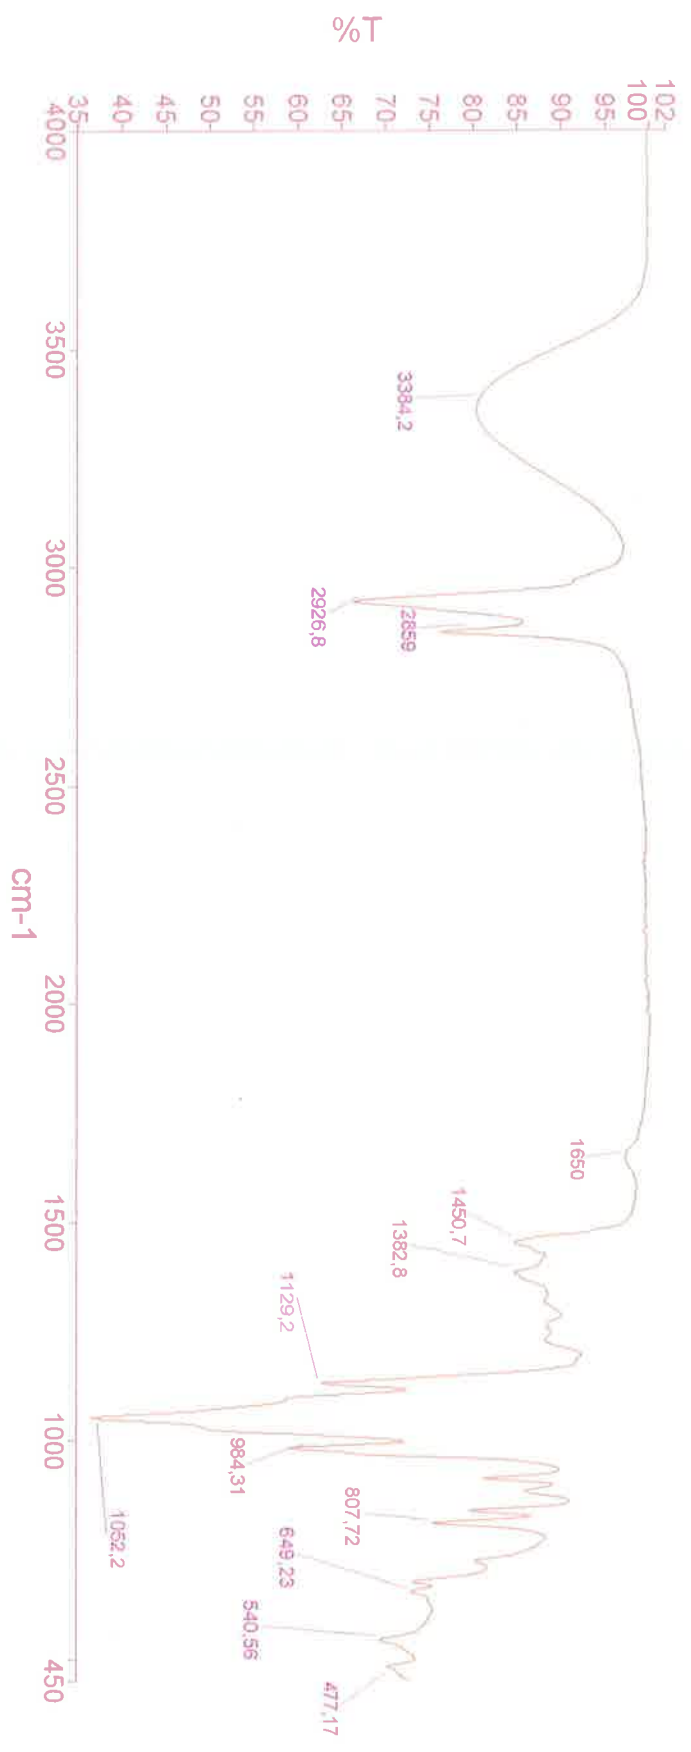

| Nom de l'échantillon | Description                                                | Trajet Optique (mm) |
|----------------------|------------------------------------------------------------|---------------------|
| RHC18RH              | Echantillon 012 Par Administrator Date lundi, mars 23 2015 | 1                   |
