# Supplementary material for: Efficient syntheses of bolaform surfactants froml-rhamnose and/or 3-(4-hydroxyphenyl)propionic acid
Source: Royal Society of Chemistry journal article supplement (doi:10.1039/c5gc00448a), 2015-01-01
Supplement: c5gc00448a4.pdf [file c5gc00448a4.pdf]

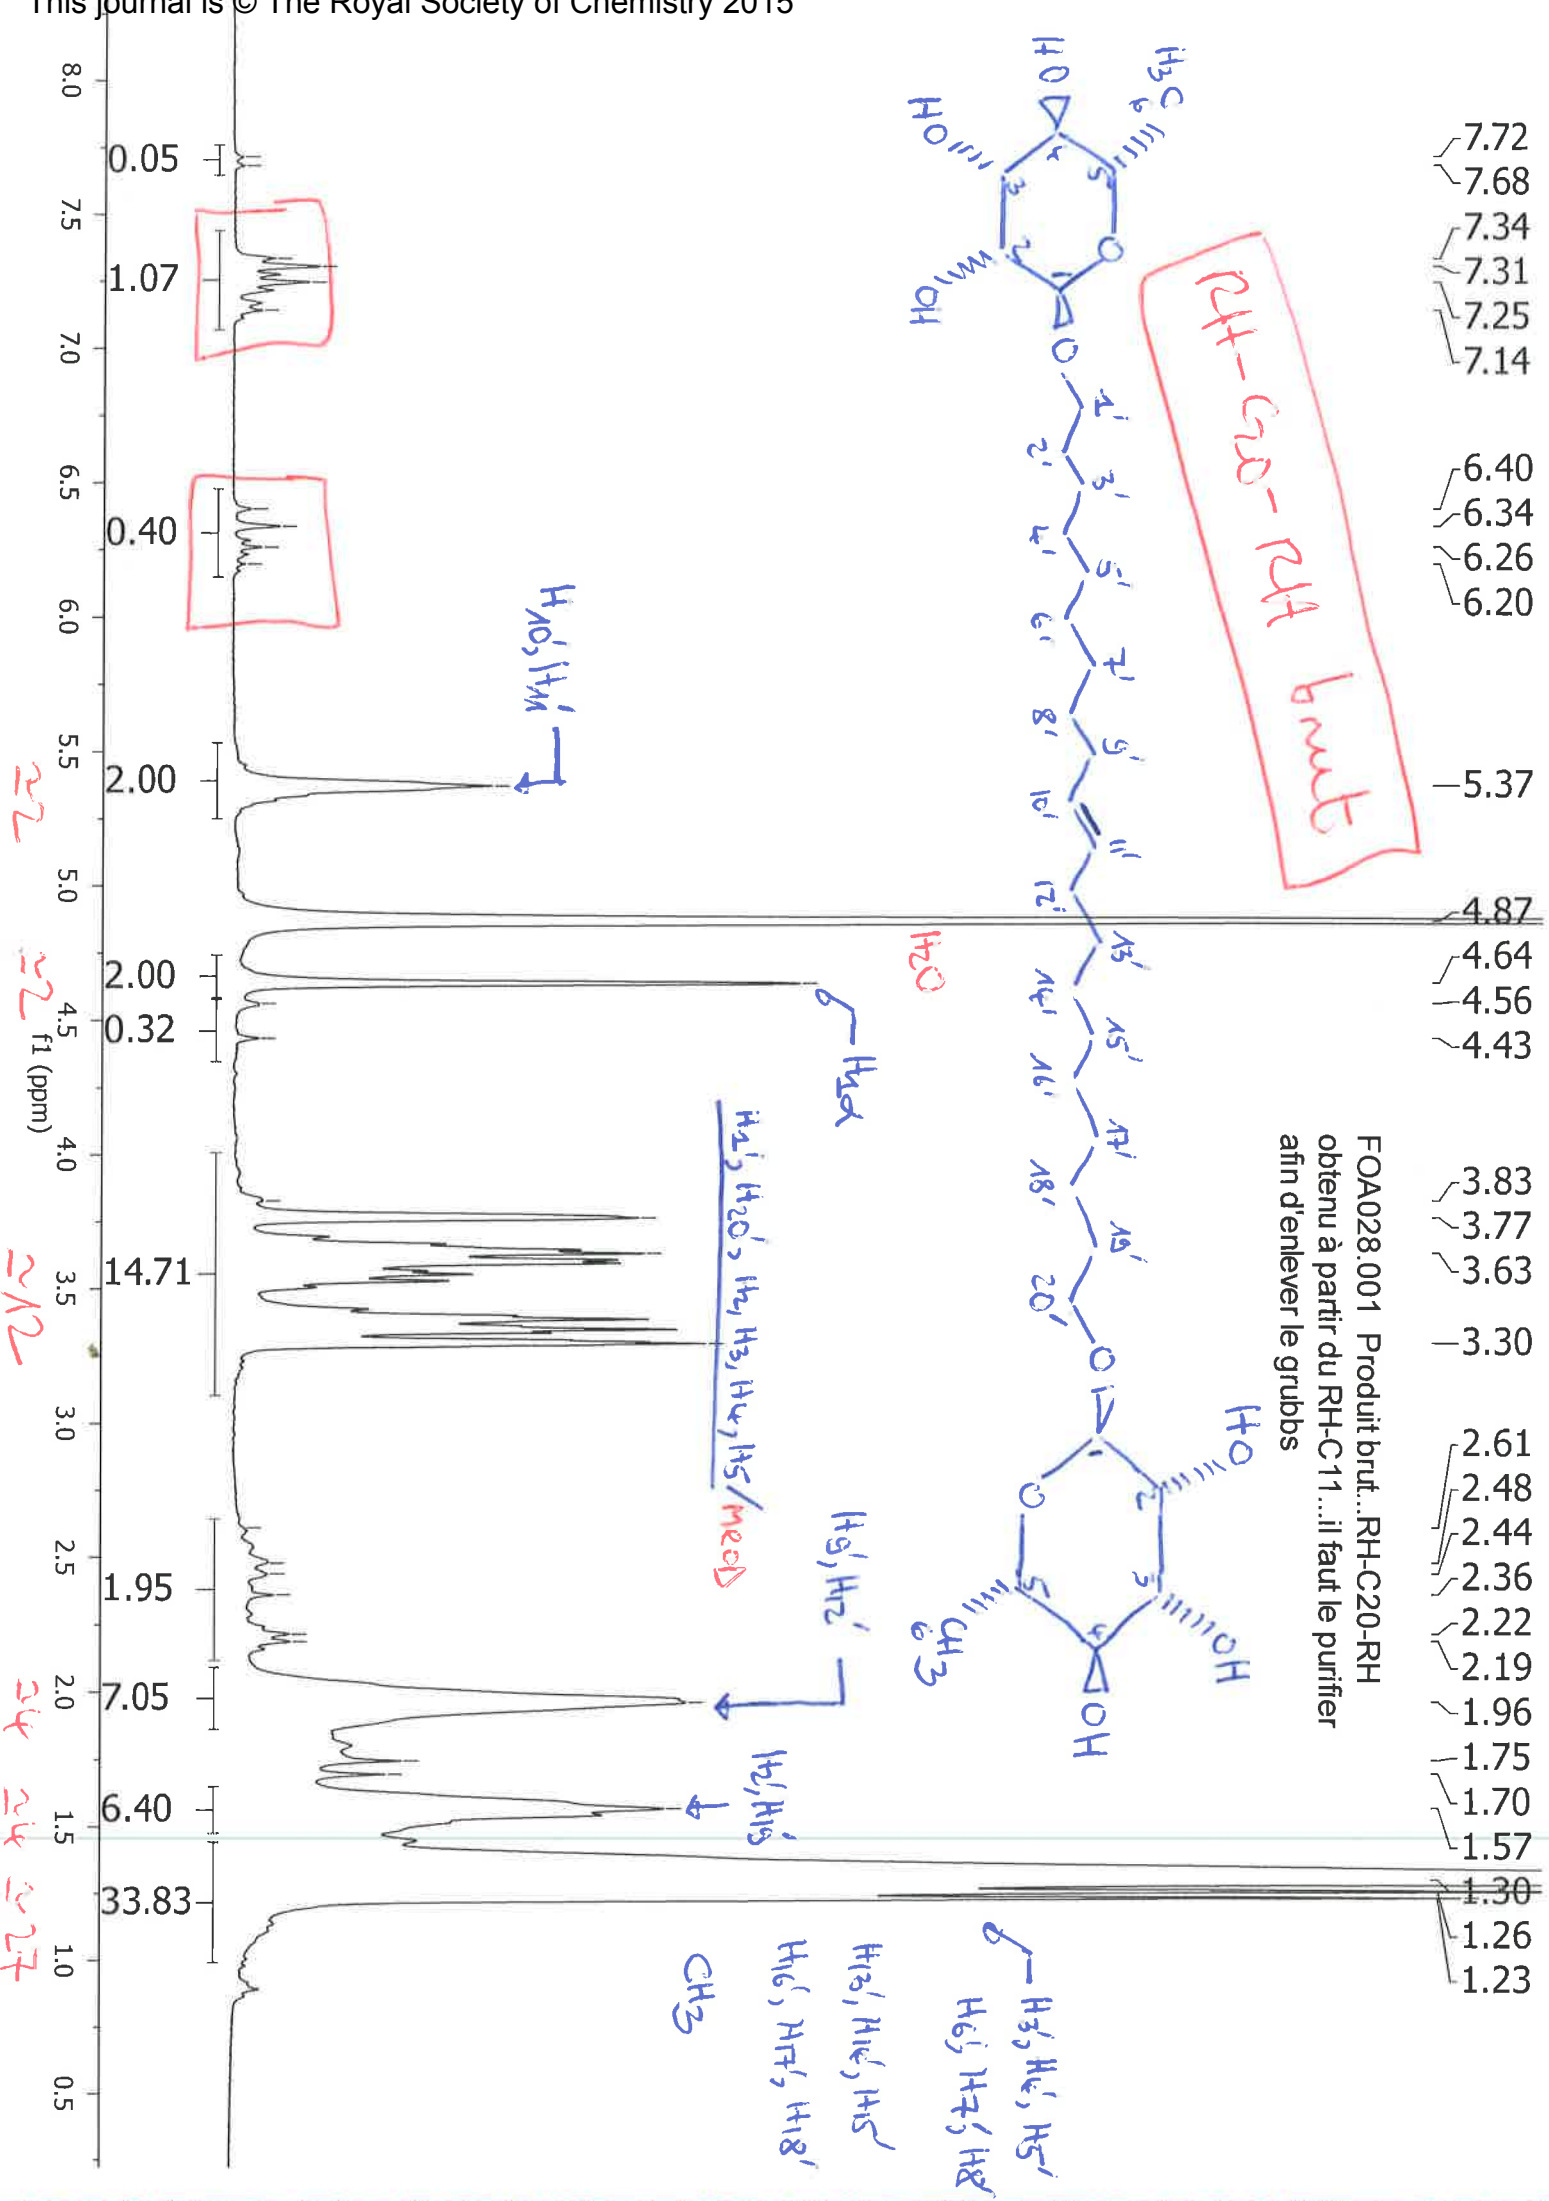

FOA028.002 Produit d'intérêt... RH-C20-RH... obtenu après purification sur colonne... MeOD... il s'agit de la deuxième tâche

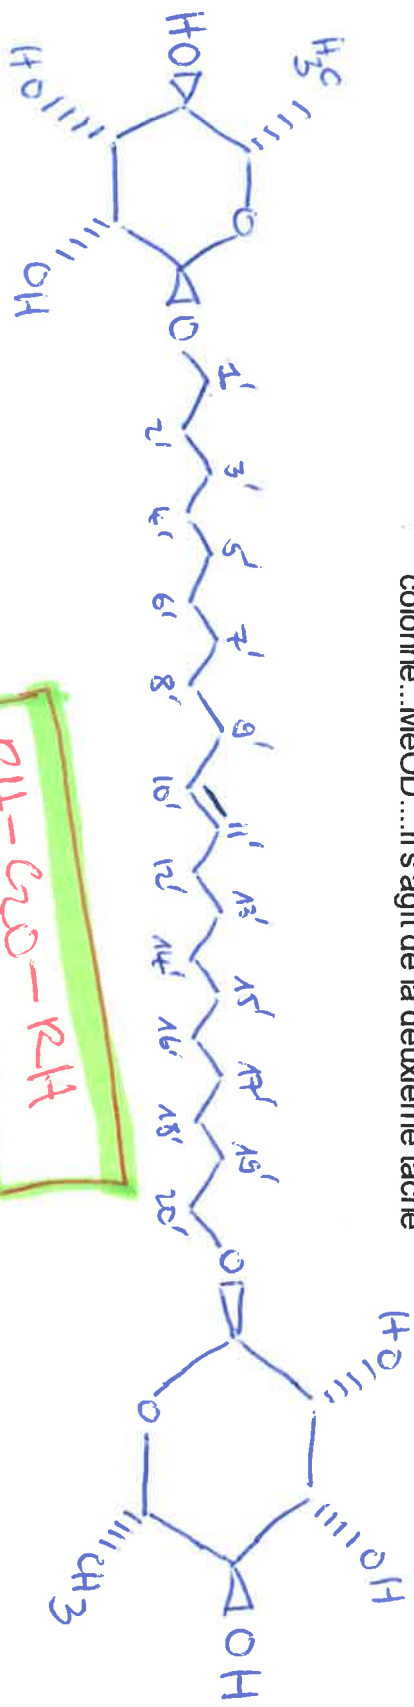

**RH-C20-RH**

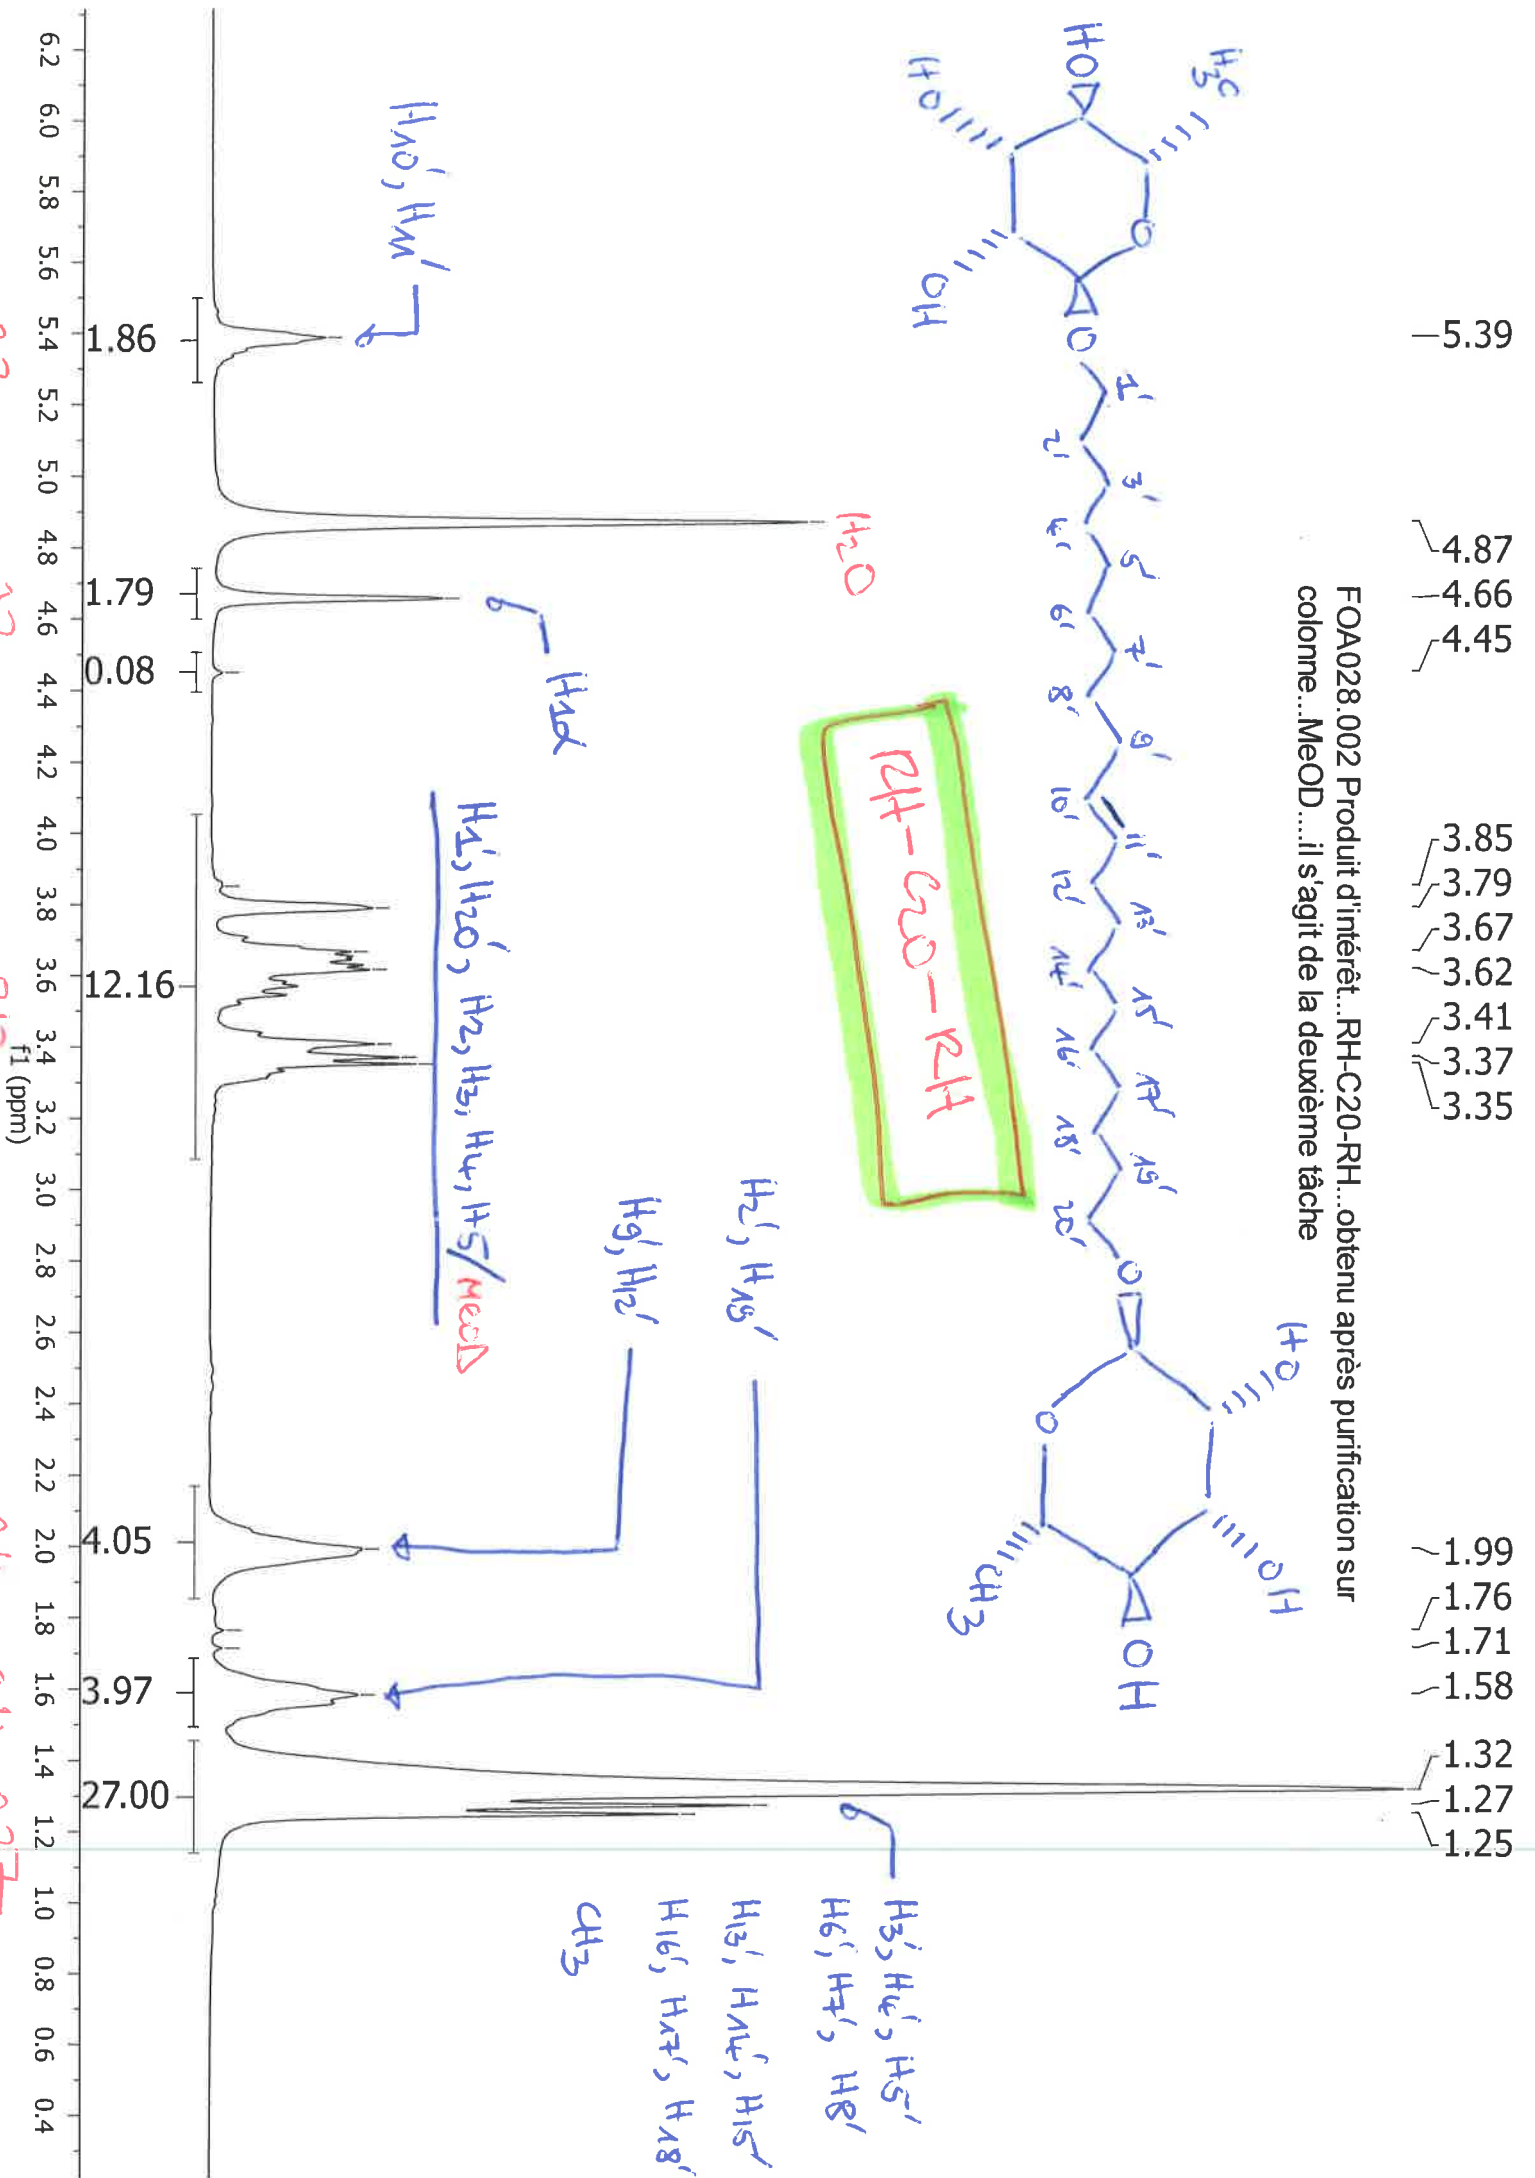

22 22 24 24 227

FOA028.002 Produit d'intérêt... RH-C20-RH... obtenu après purification sur colonne... MeOD... il s'agit de la deuxième tâche

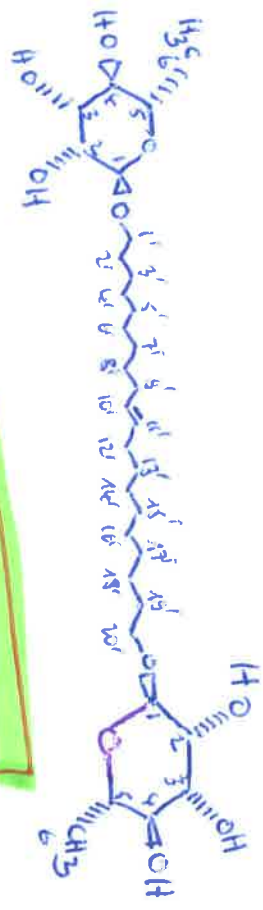

**244-C20-244**

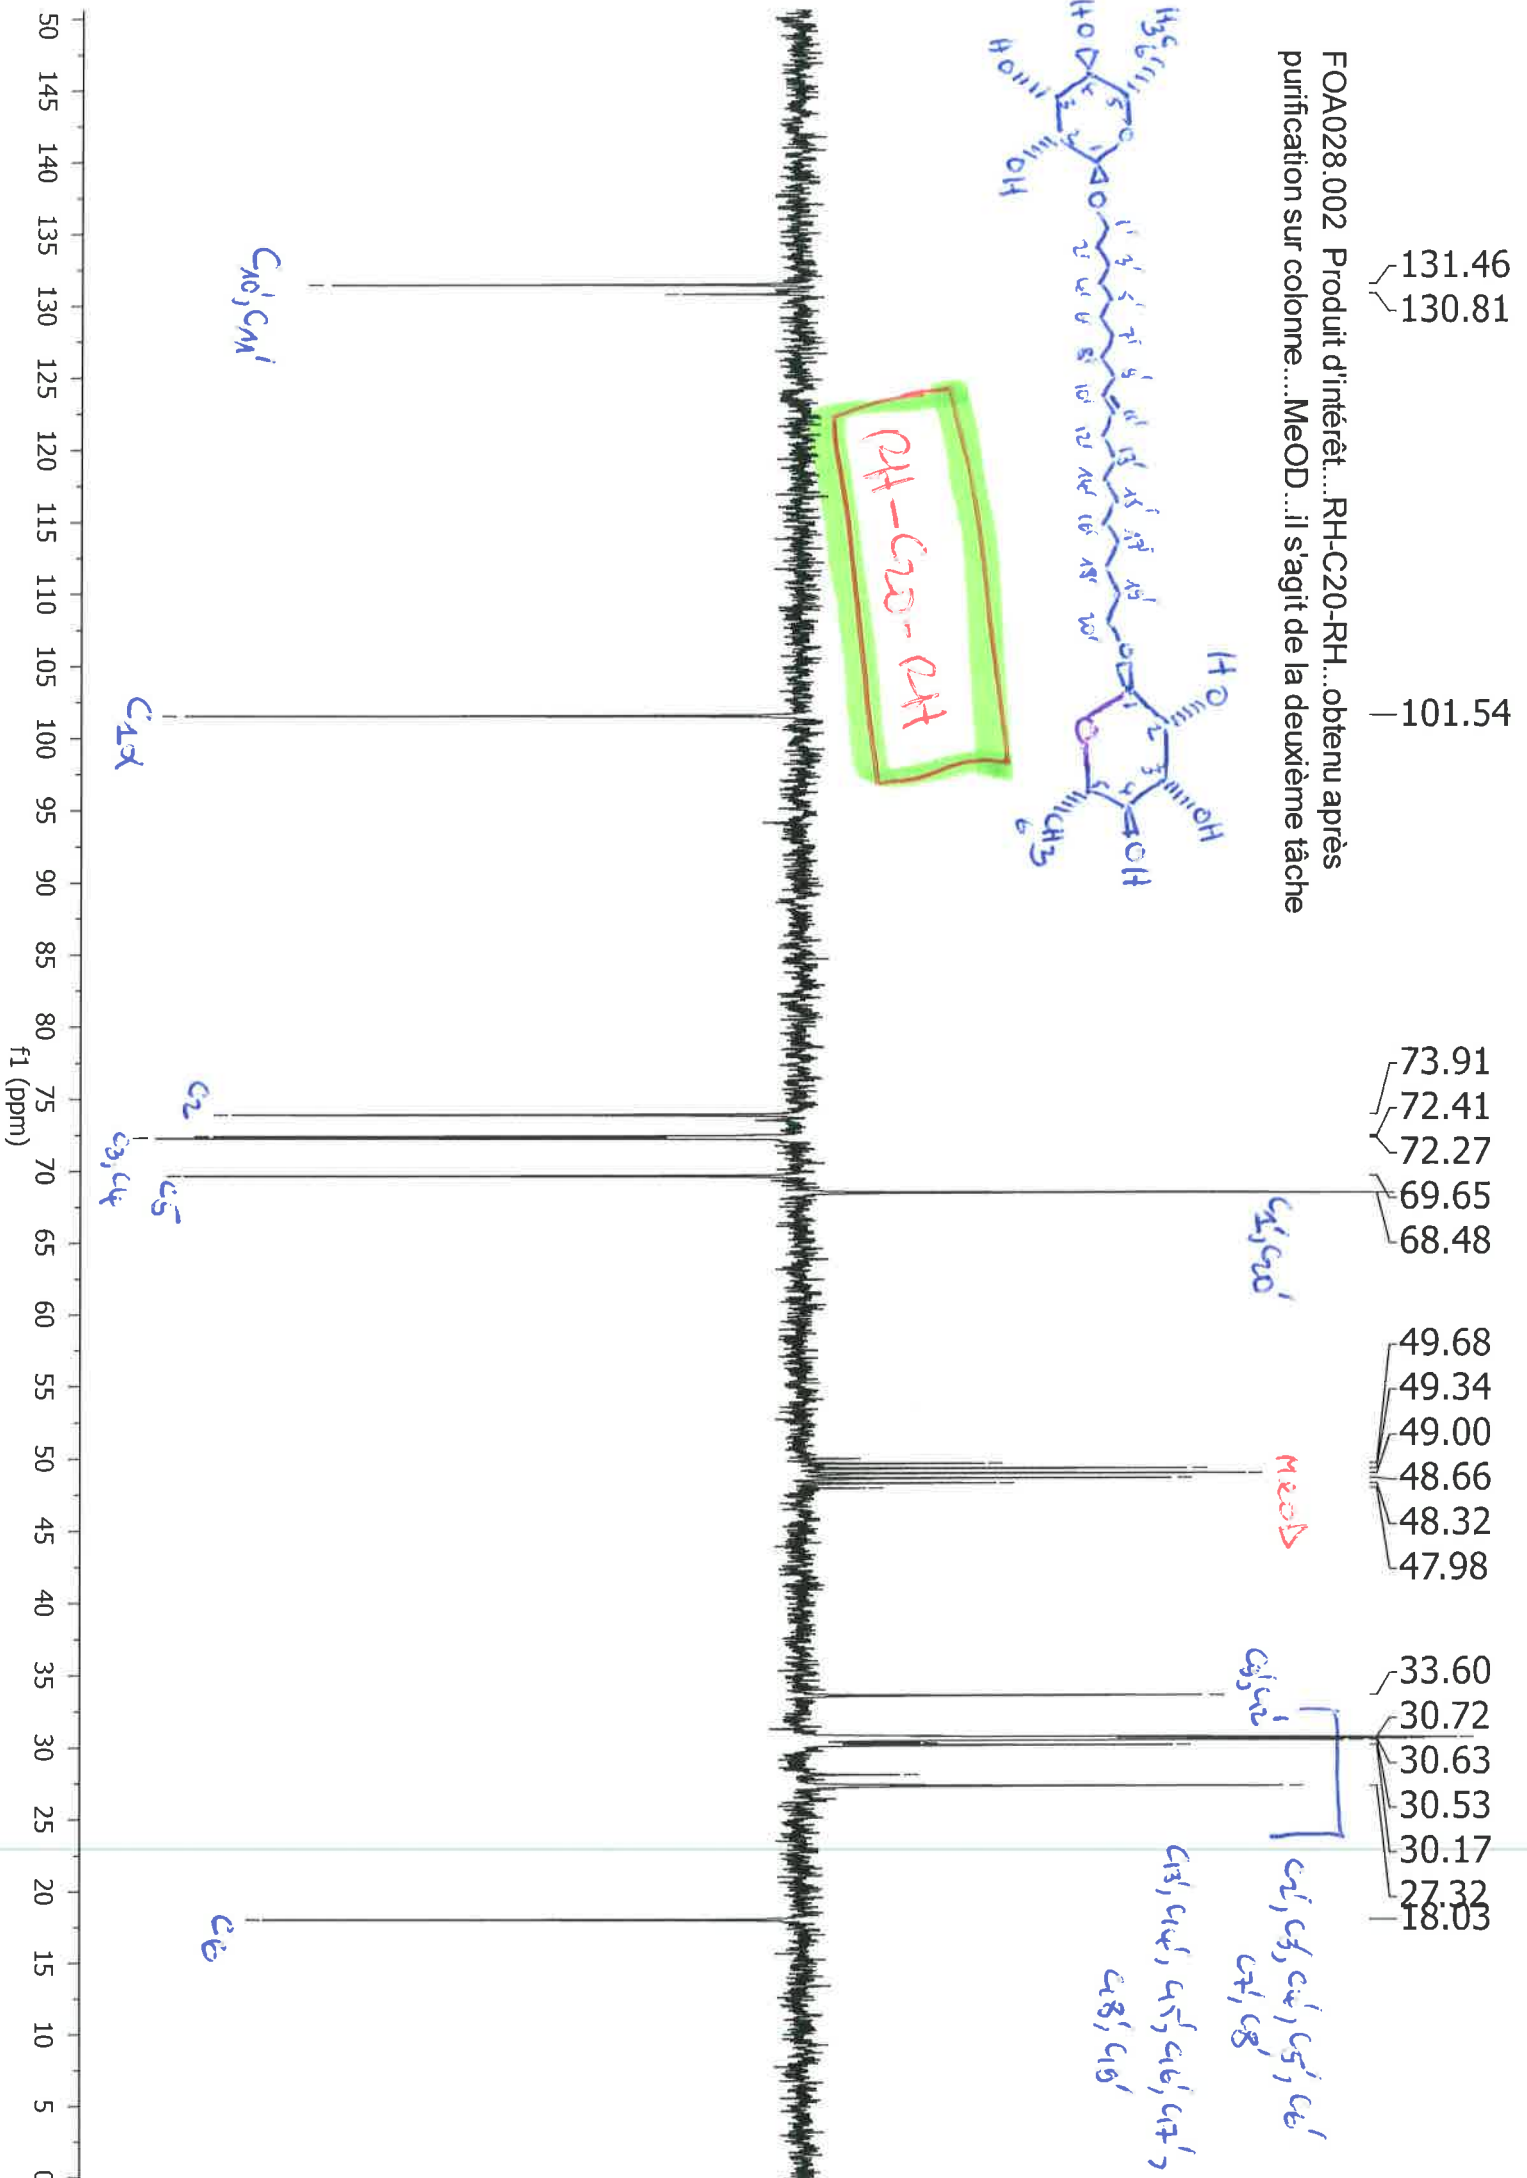

Analyse Administrator  
Date lundi 23 mars 2015 22:13

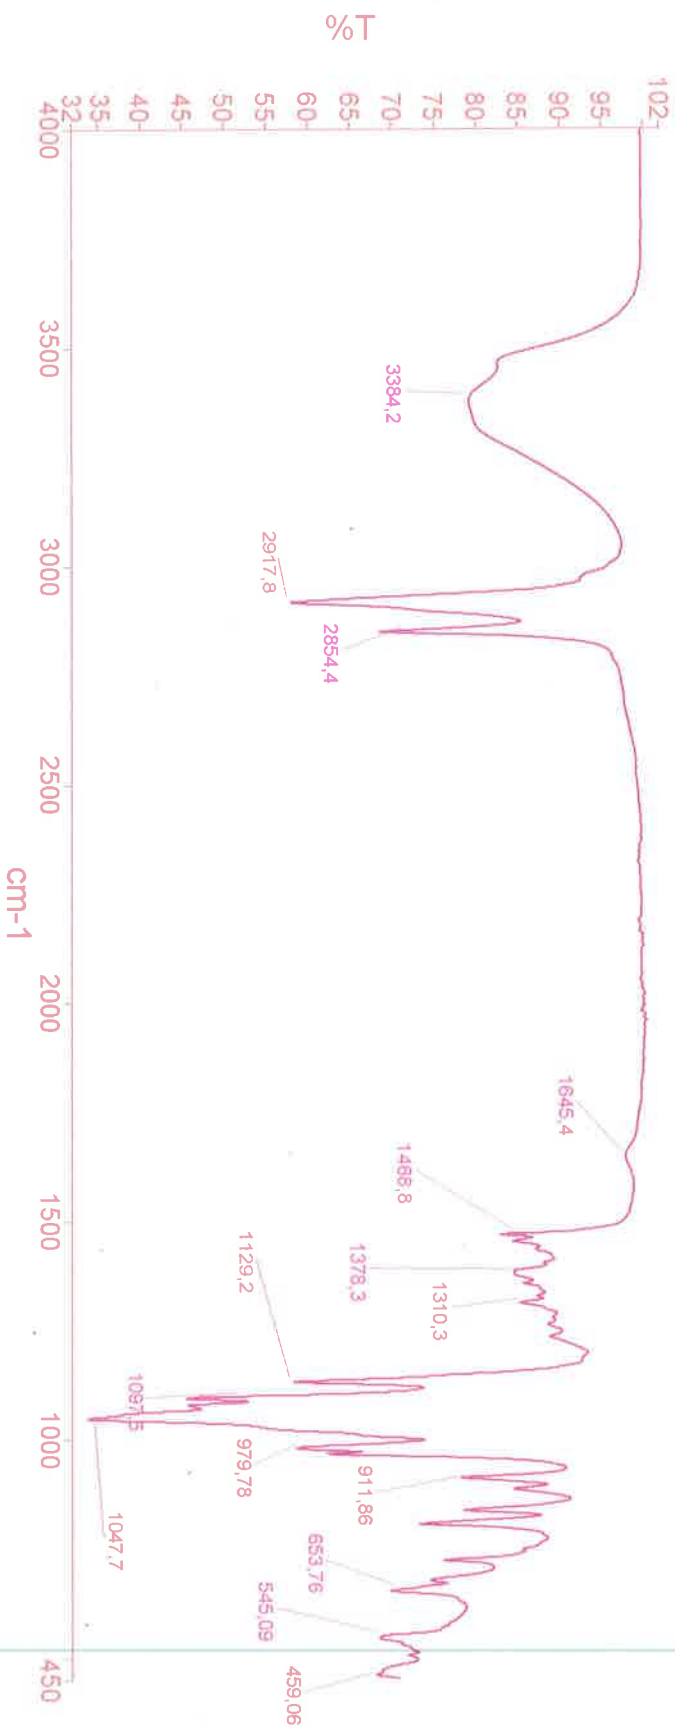

| Nom de l'échantillon | Description                                                | Trajet Optique (mm) |
|----------------------|------------------------------------------------------------|---------------------|
| RHC201RH             | Echantillon 013 Par Administrator Date lundi, mars 23 2015 | 1                   |
