# Supplementary material for: Efficient syntheses of bolaform surfactants froml-rhamnose and/or 3-(4-hydroxyphenyl)propionic acid
Source: Royal Society of Chemistry journal article supplement (doi:10.1039/c5gc00448a), 2015-01-01
Supplement: c5gc00448a6.pdf [file c5gc00448a6.pdf]

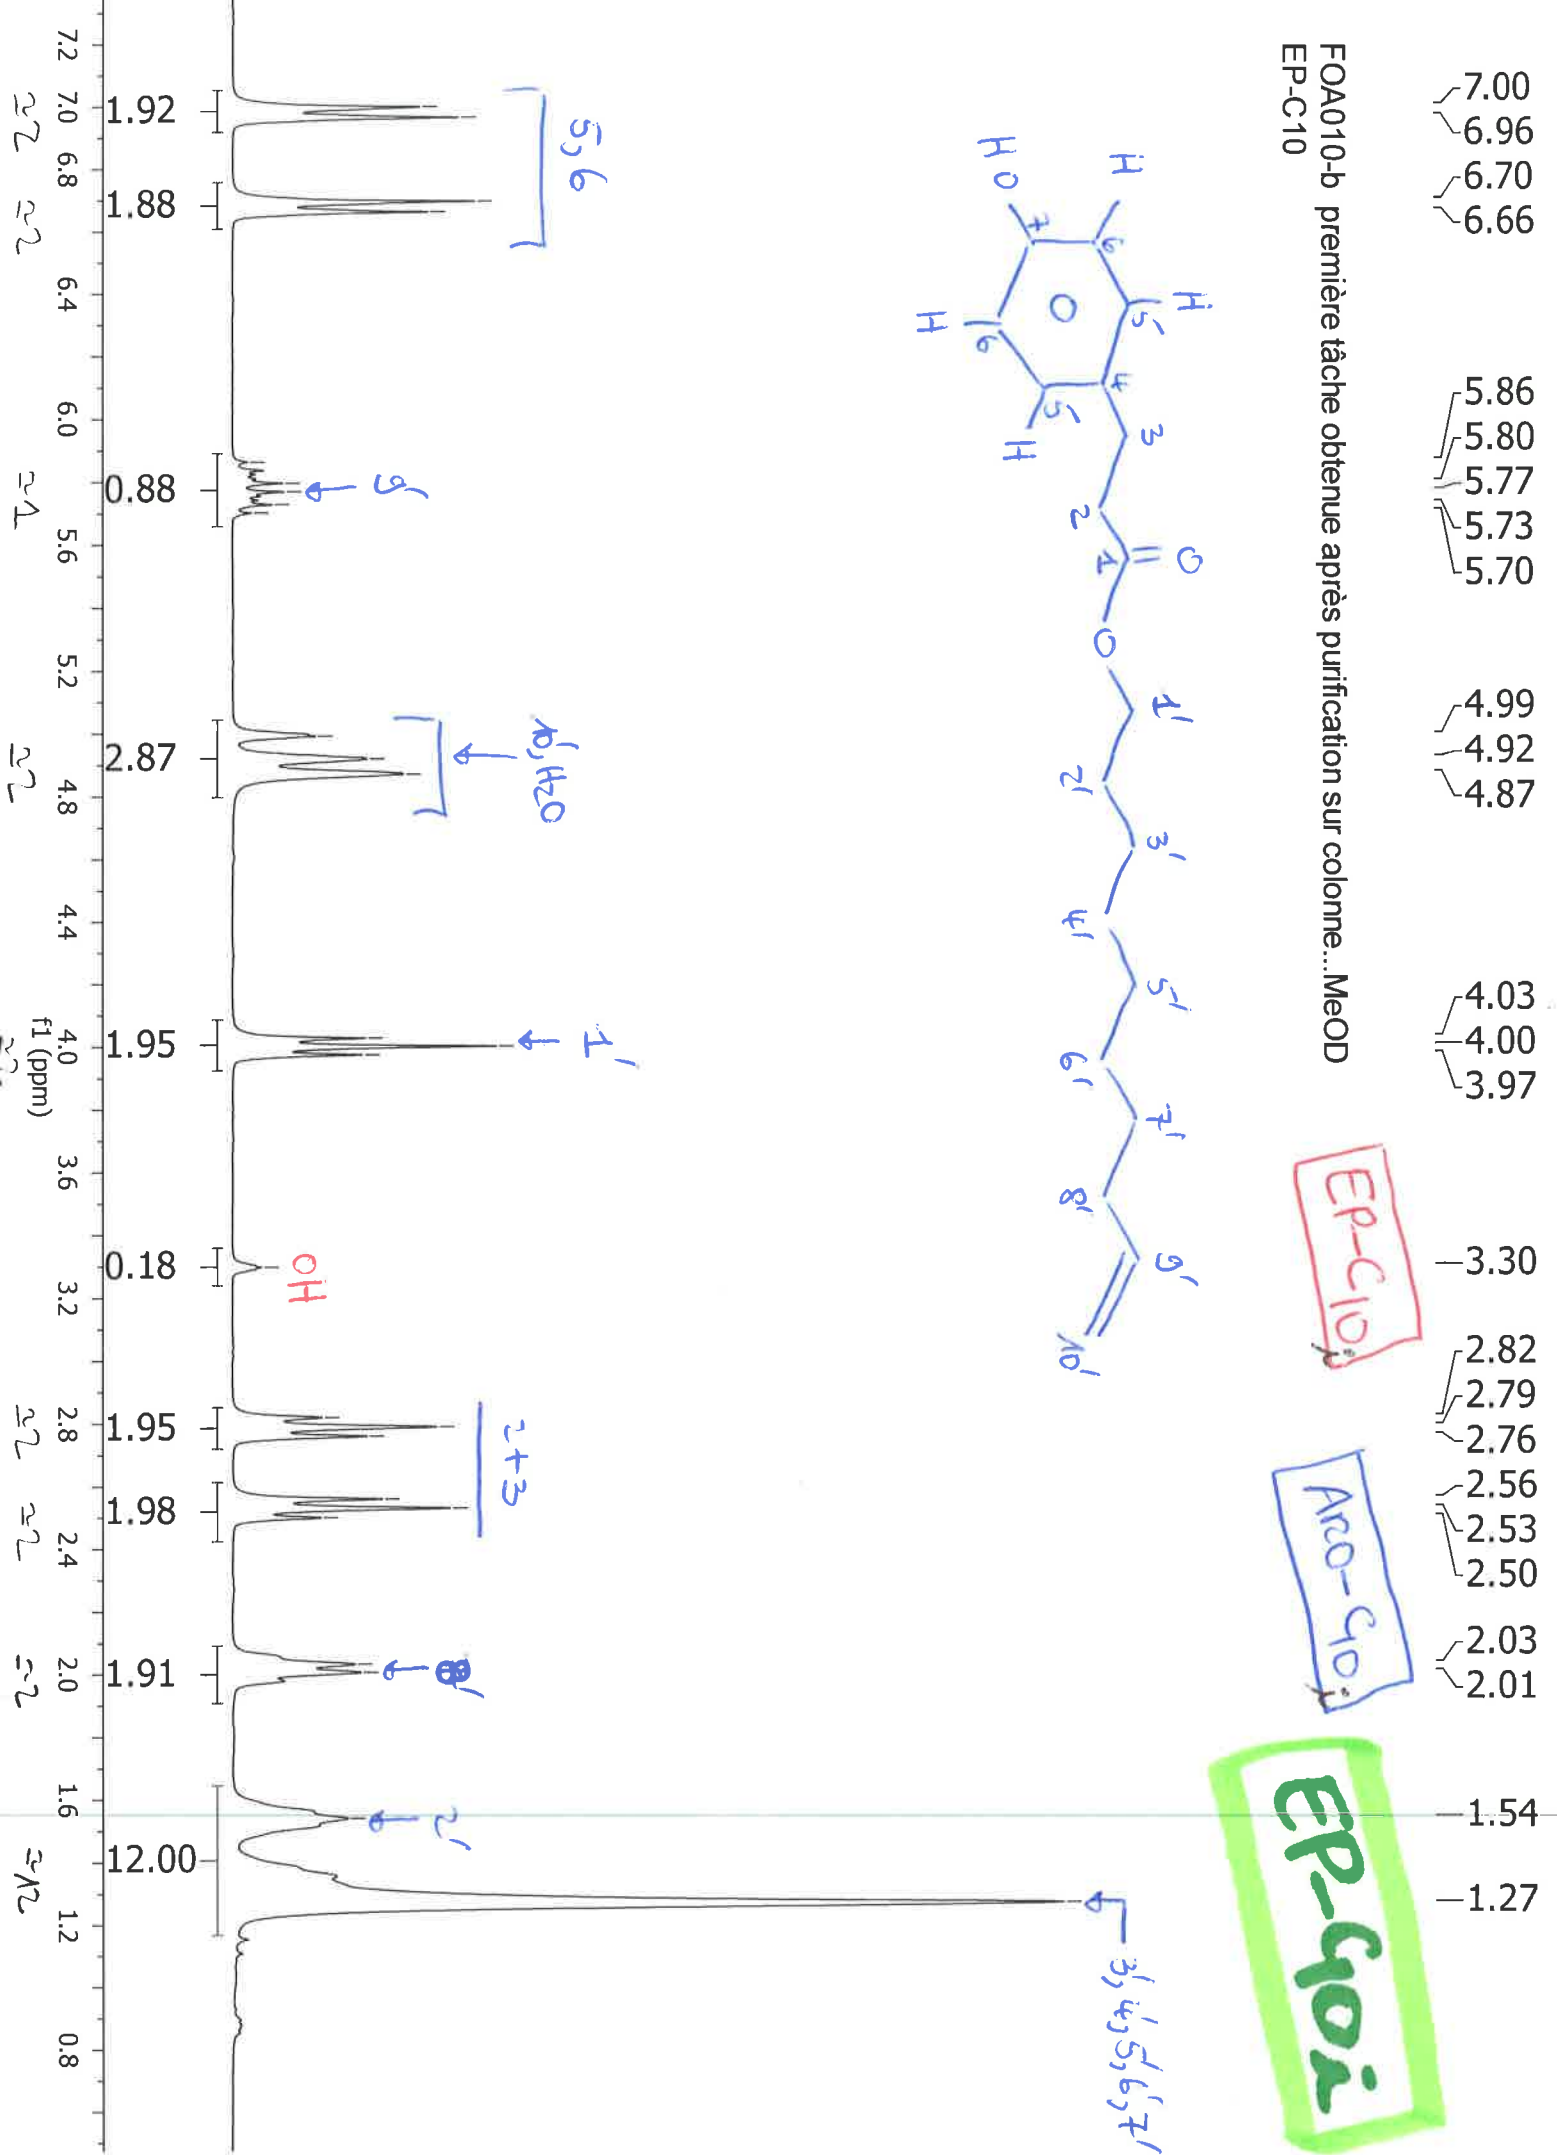

EP-C10b

FOA010-b première tache obtenue après purification sur colonne...MeOD..EP-C10

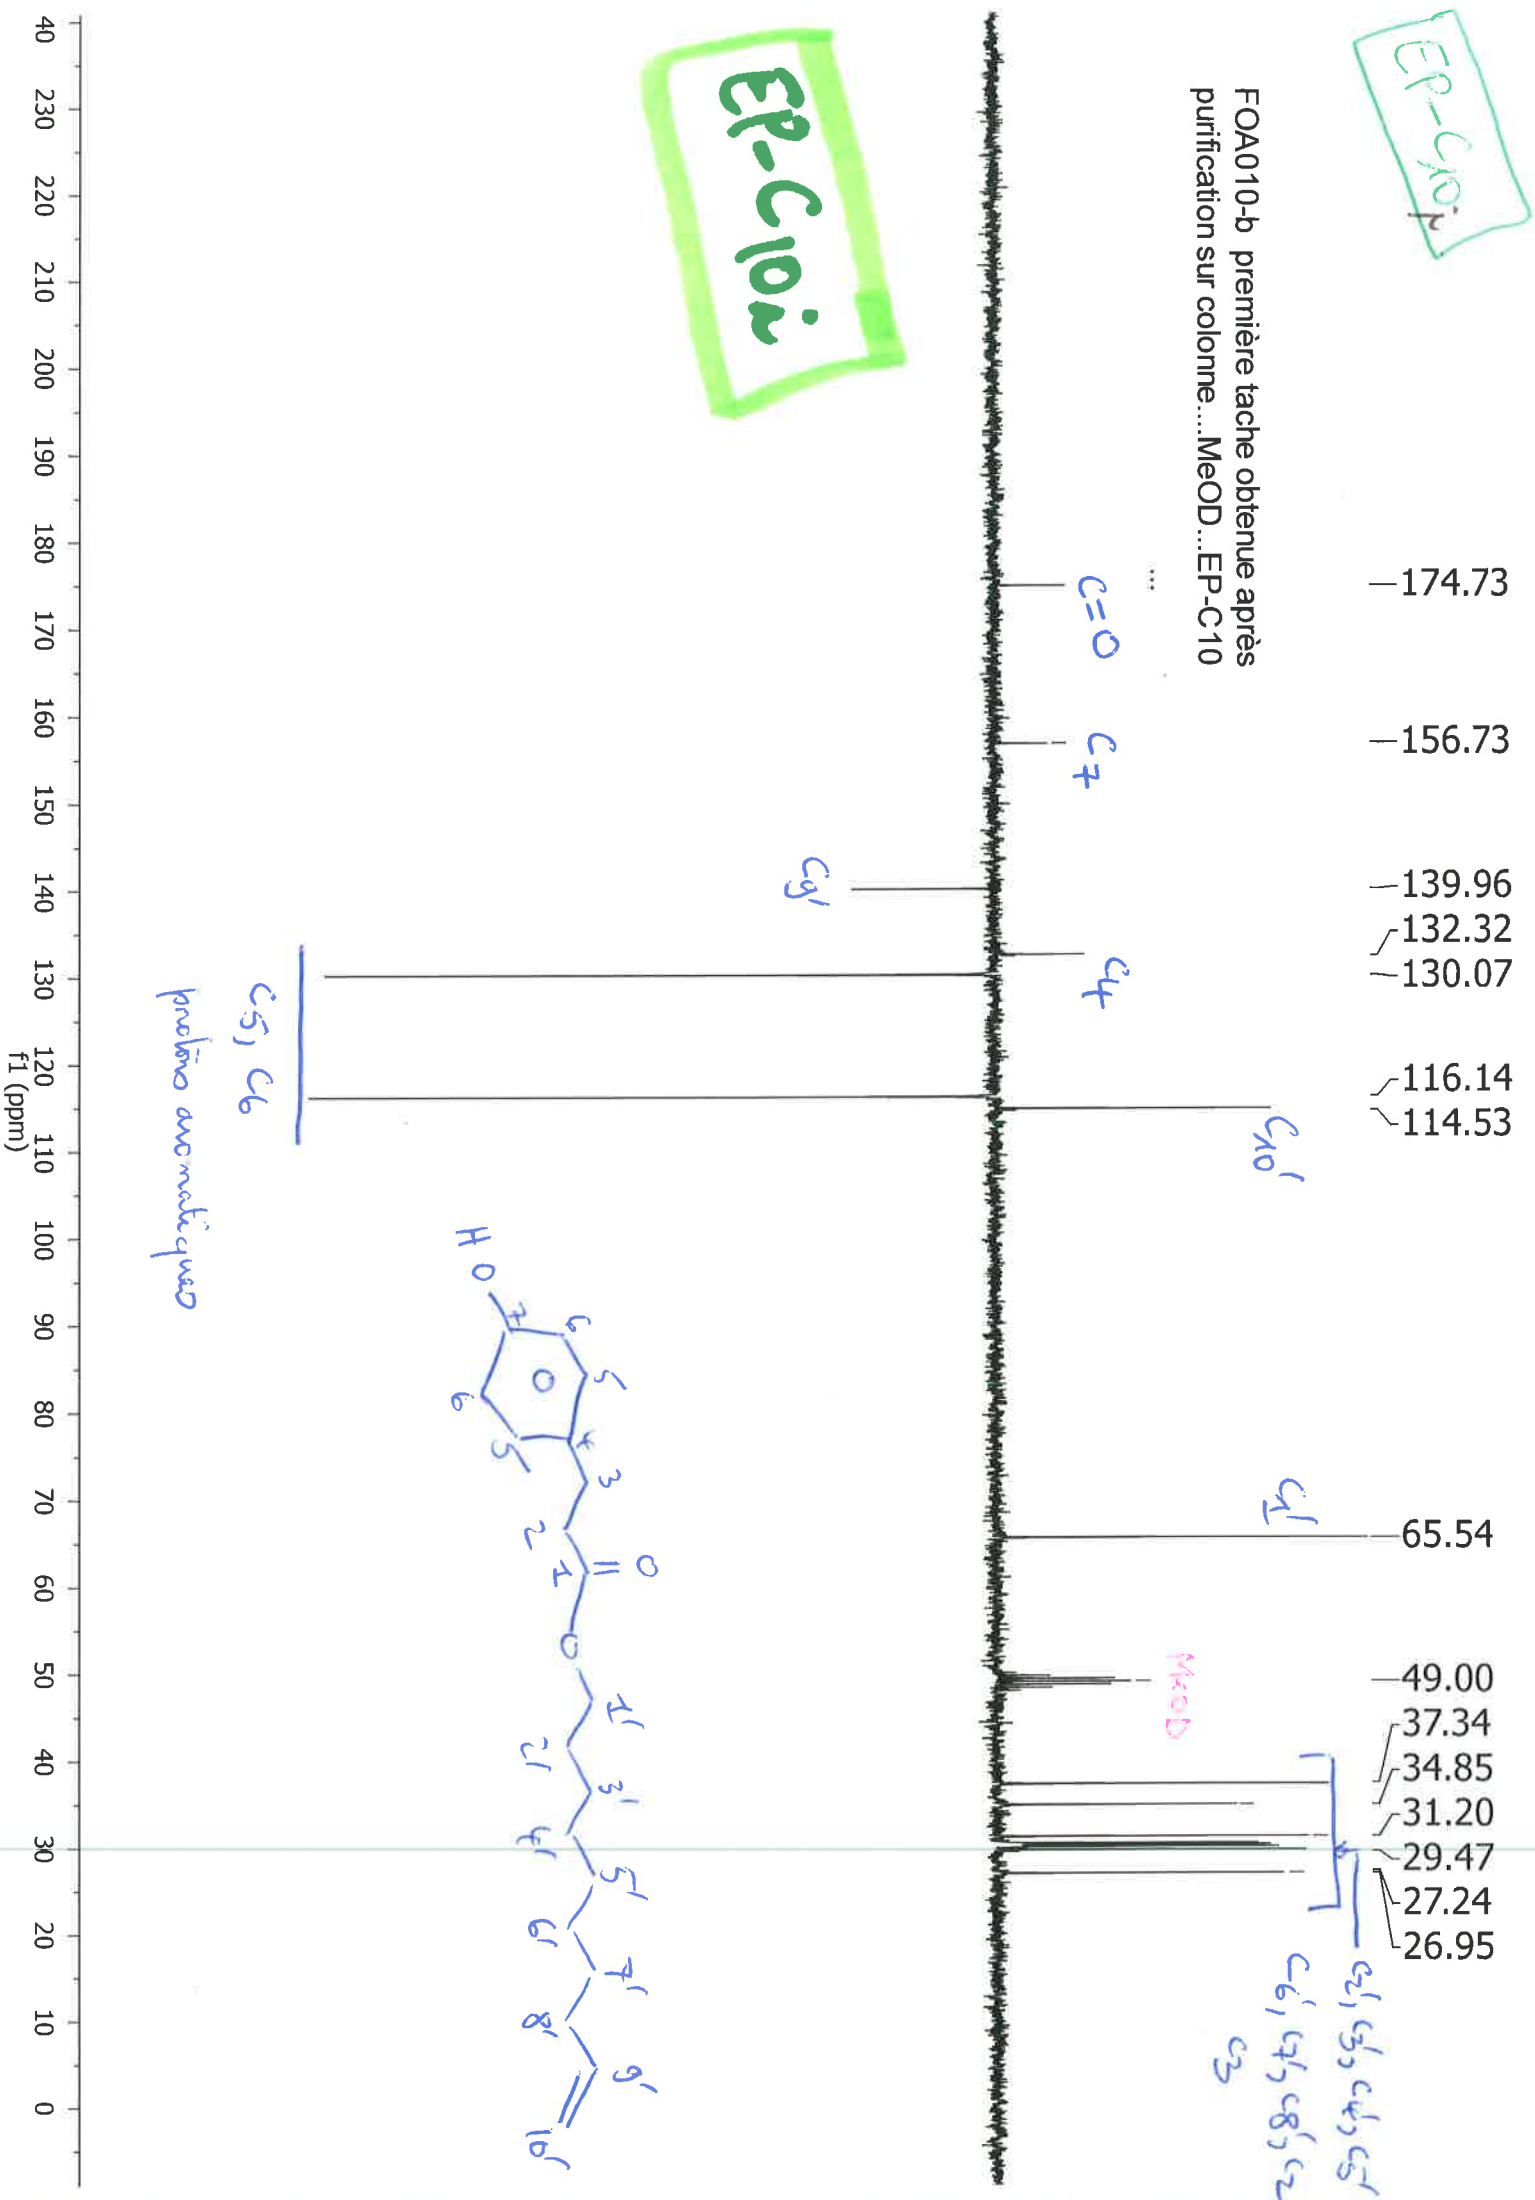

Analyse Administrator  
Date lundi 23 mars 2015 22:28

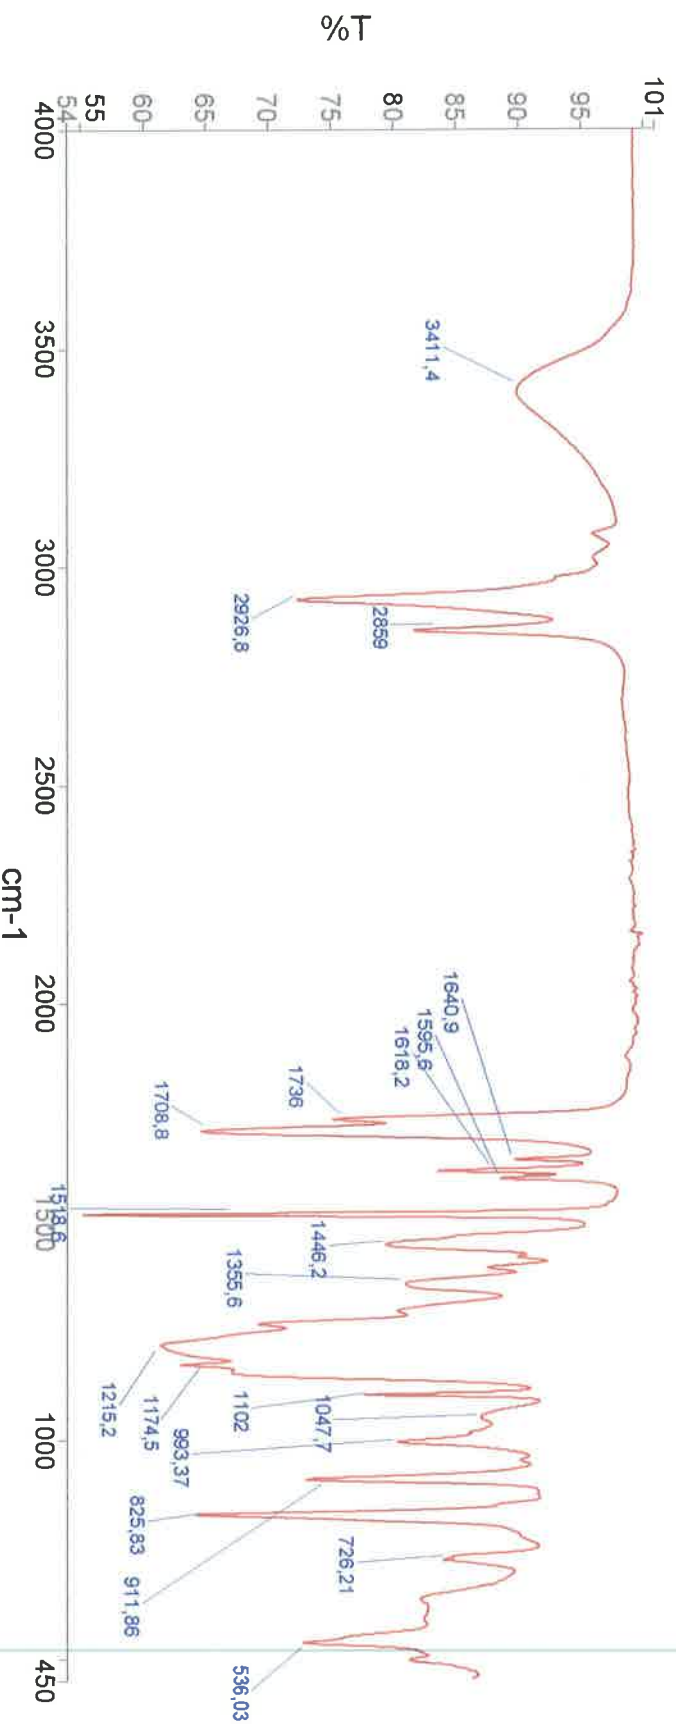

| Nom de l'échantillon | Description                                                | Trajet Optique (mm) |
|----------------------|------------------------------------------------------------|---------------------|
| EPC10i               | Echantillon 015 Par Administrator Date lundi, mars 23 2015 | 1                   |
