# Supplementary material for: Efficient syntheses of bolaform surfactants froml-rhamnose and/or 3-(4-hydroxyphenyl)propionic acid
Source: Royal Society of Chemistry journal article supplement (doi:10.1039/c5gc00448a), 2015-01-01
Supplement: c5gc00448a7.pdf [file c5gc00448a7.pdf]

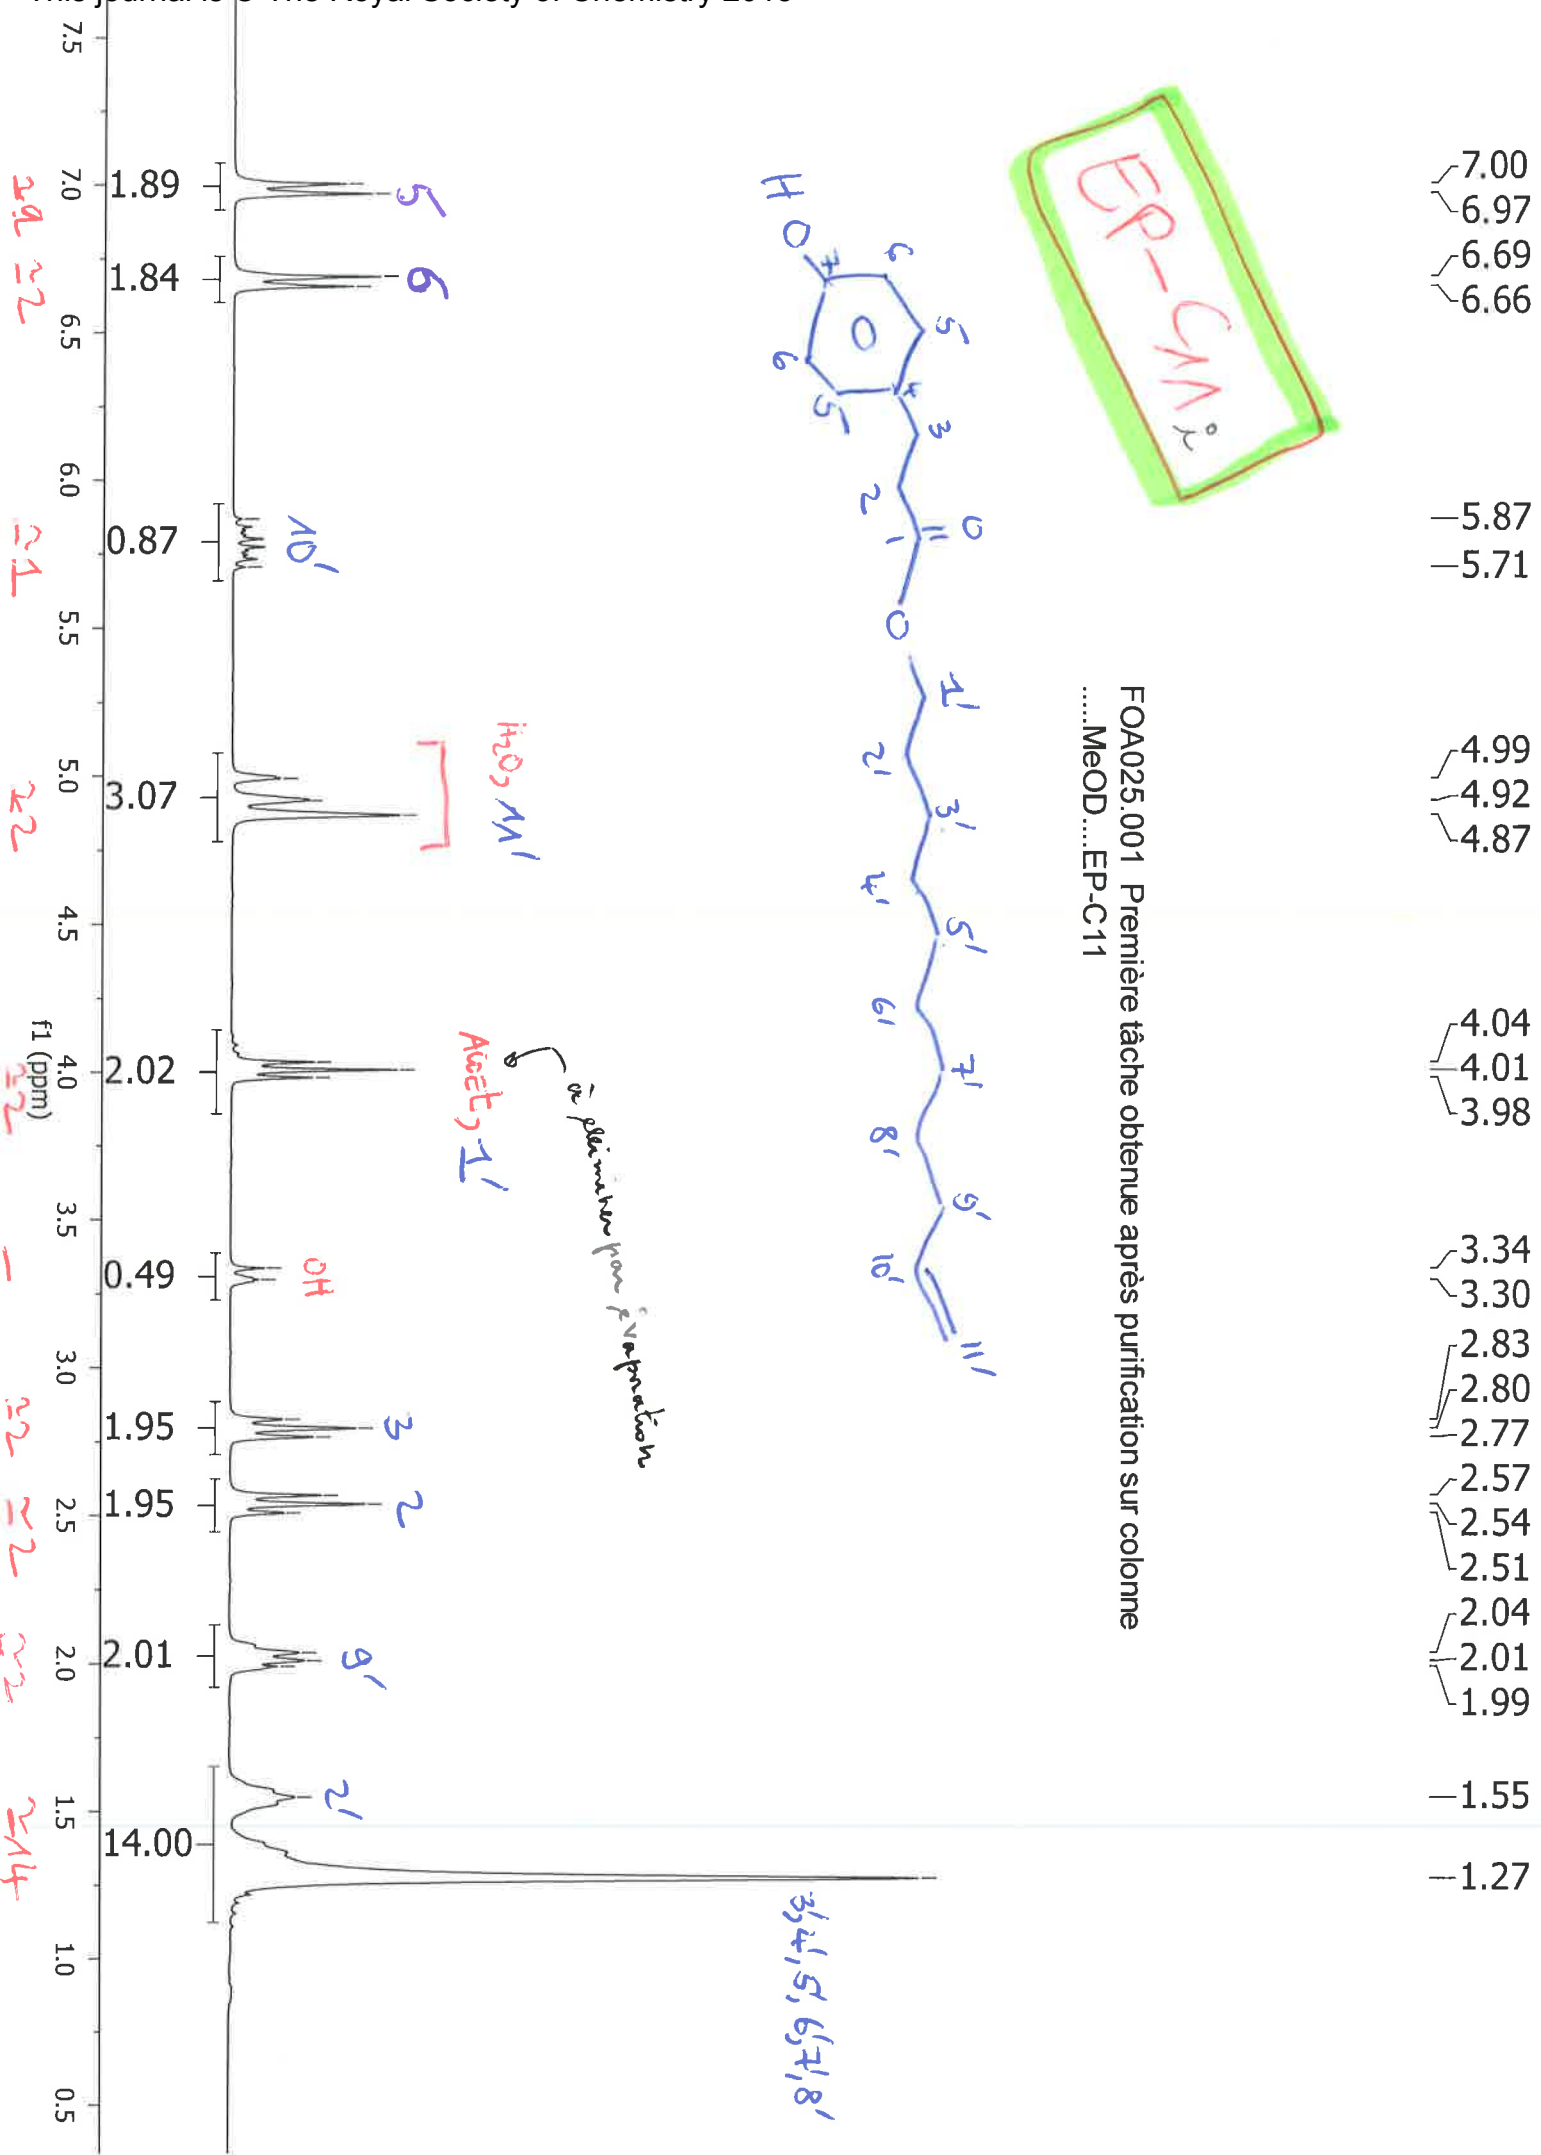

EP-CM<sub>2</sub>

FOA011-b première tâche obtenue  
 après purification sur colonne.....MeOD  
 EP-C11

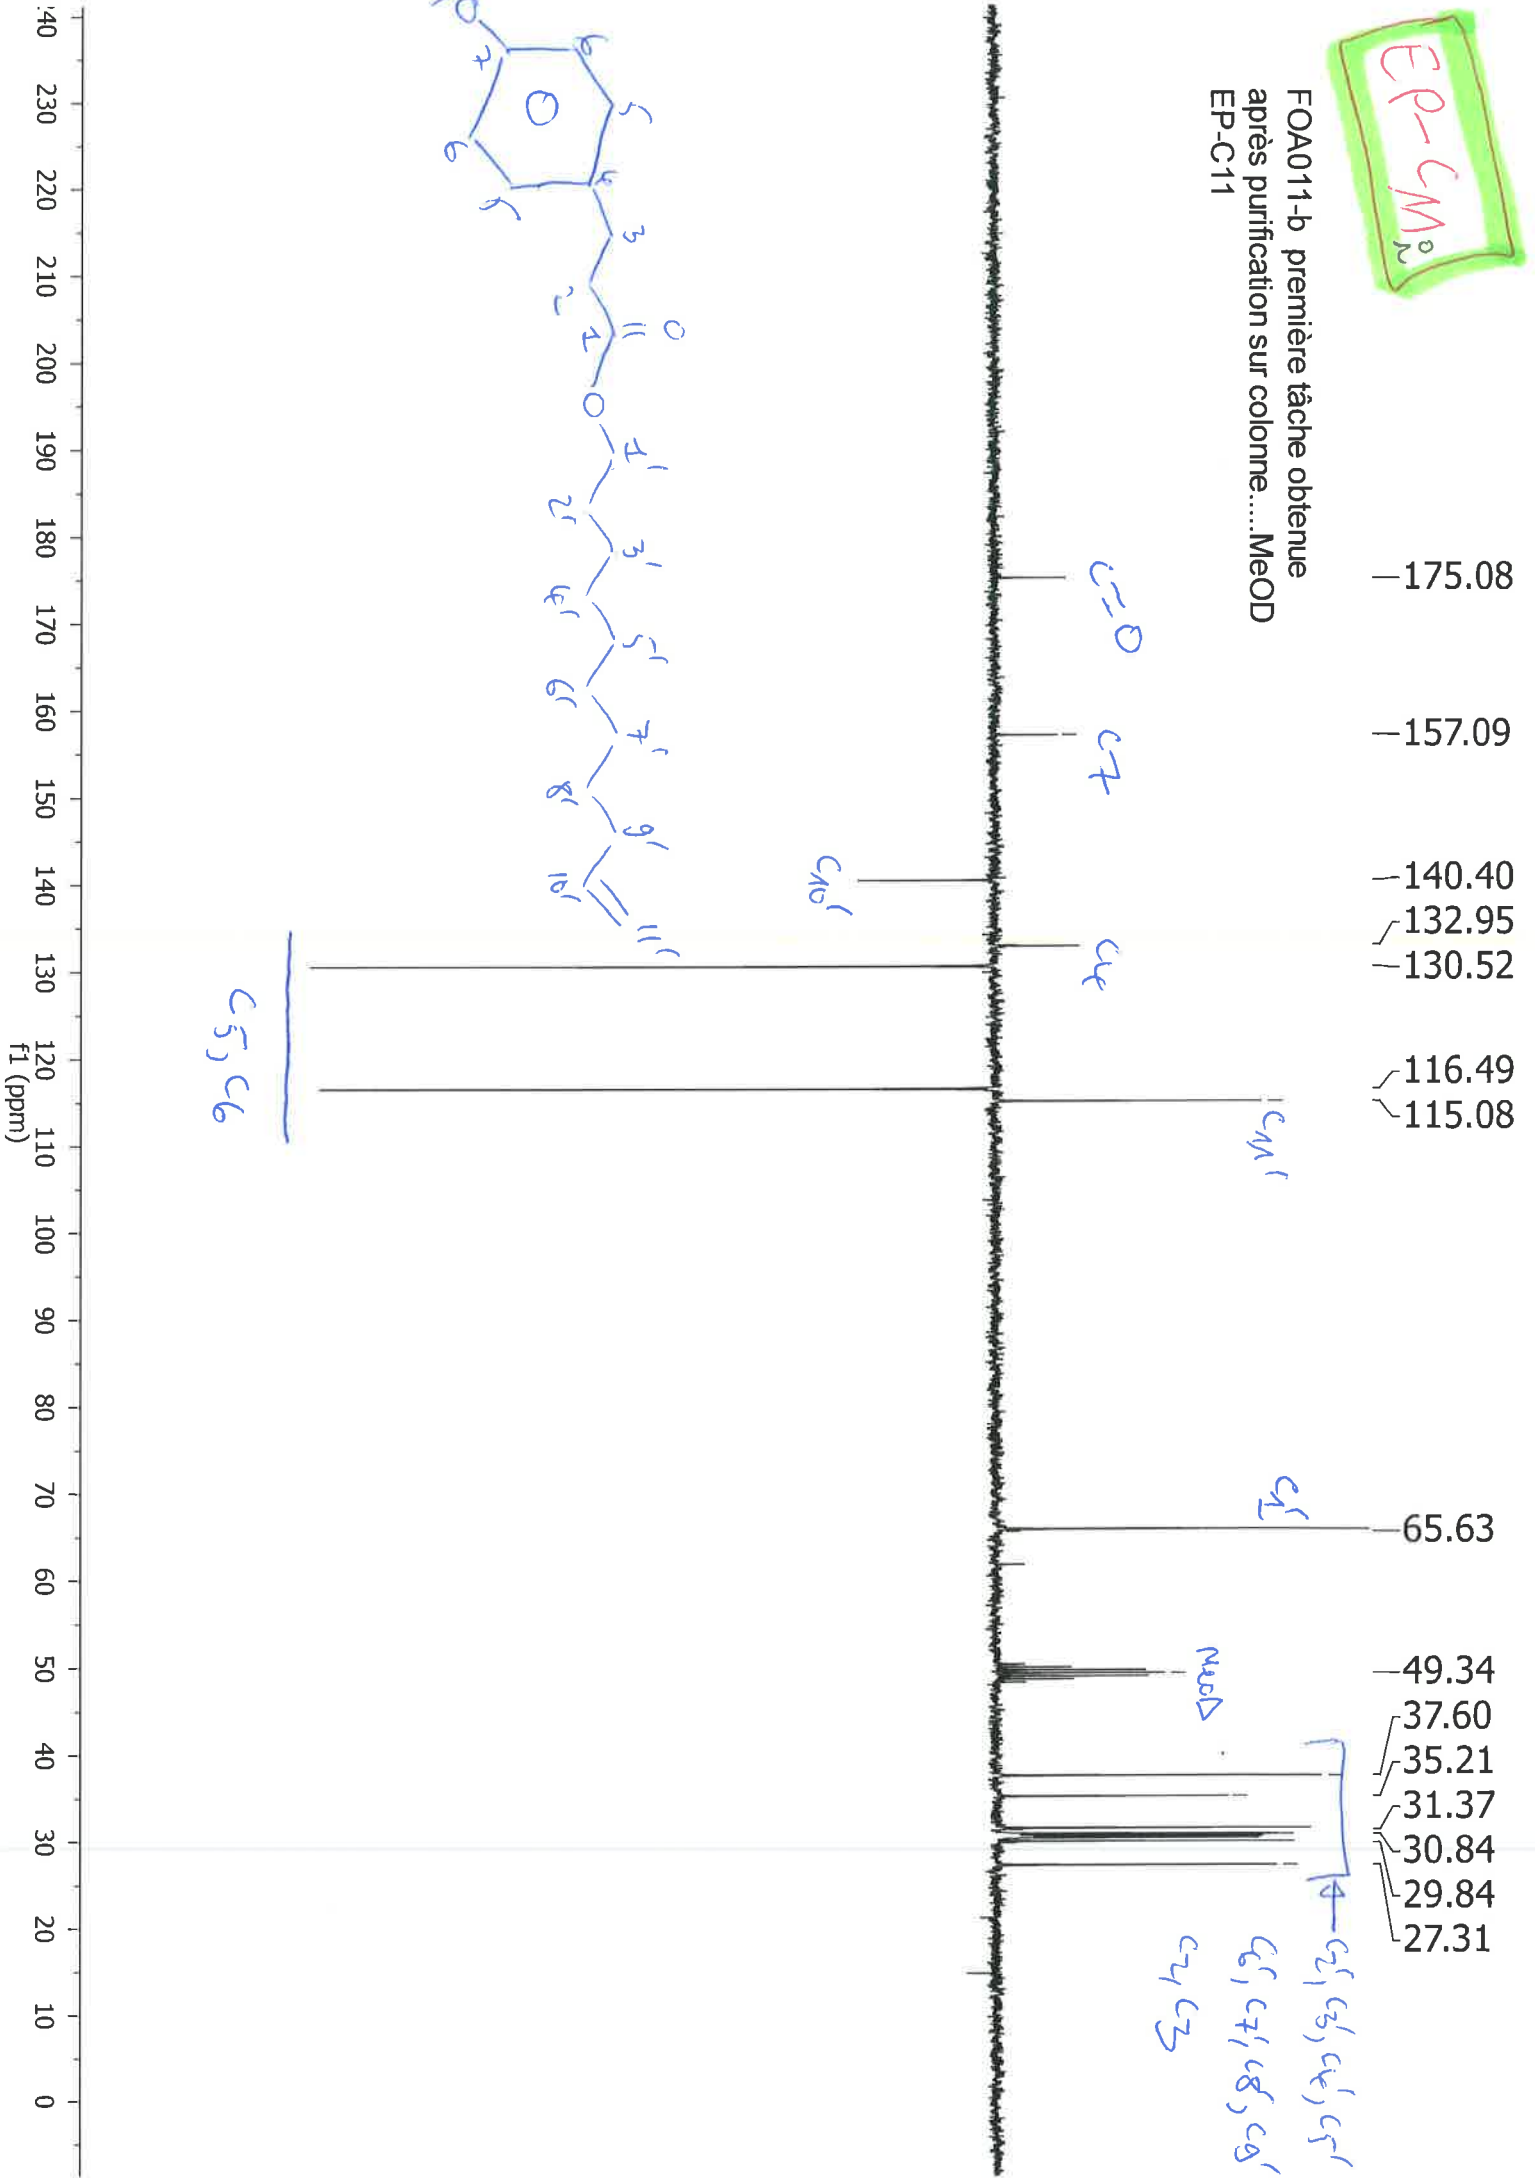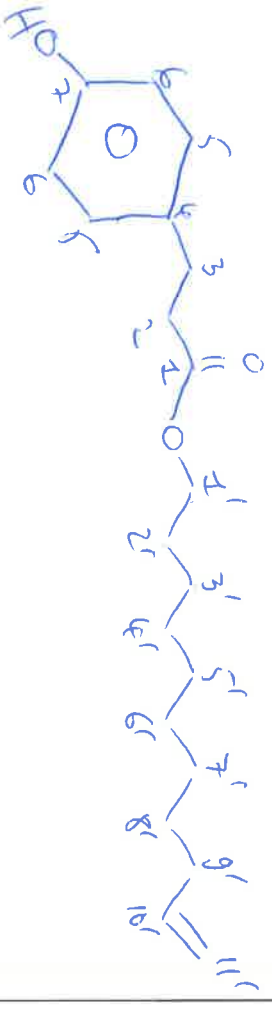

Analyse Administrator  
Date Lundi 23 mars 2015 22:35

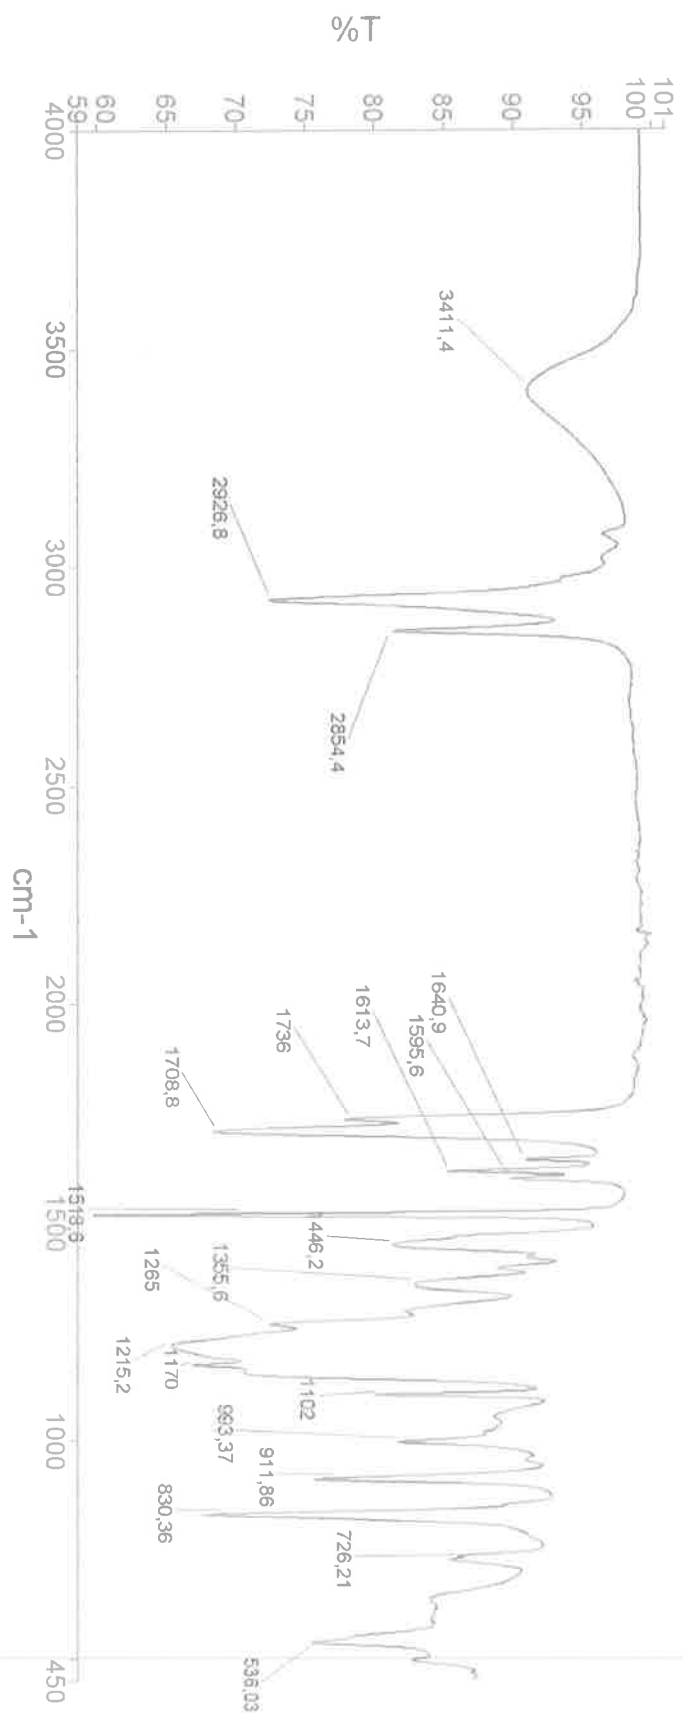

| Nom de l'échantillon | Description                                                | Trajet Optique (mm) |
|----------------------|------------------------------------------------------------|---------------------|
| EPC11i               | Echantillon 016 Par Administrator Date lundi, mars 23 2015 | 1                   |
