# Supplementary material for: Efficient syntheses of bolaform surfactants froml-rhamnose and/or 3-(4-hydroxyphenyl)propionic acid
Source: Royal Society of Chemistry journal article supplement (doi:10.1039/c5gc00448a), 2015-01-01

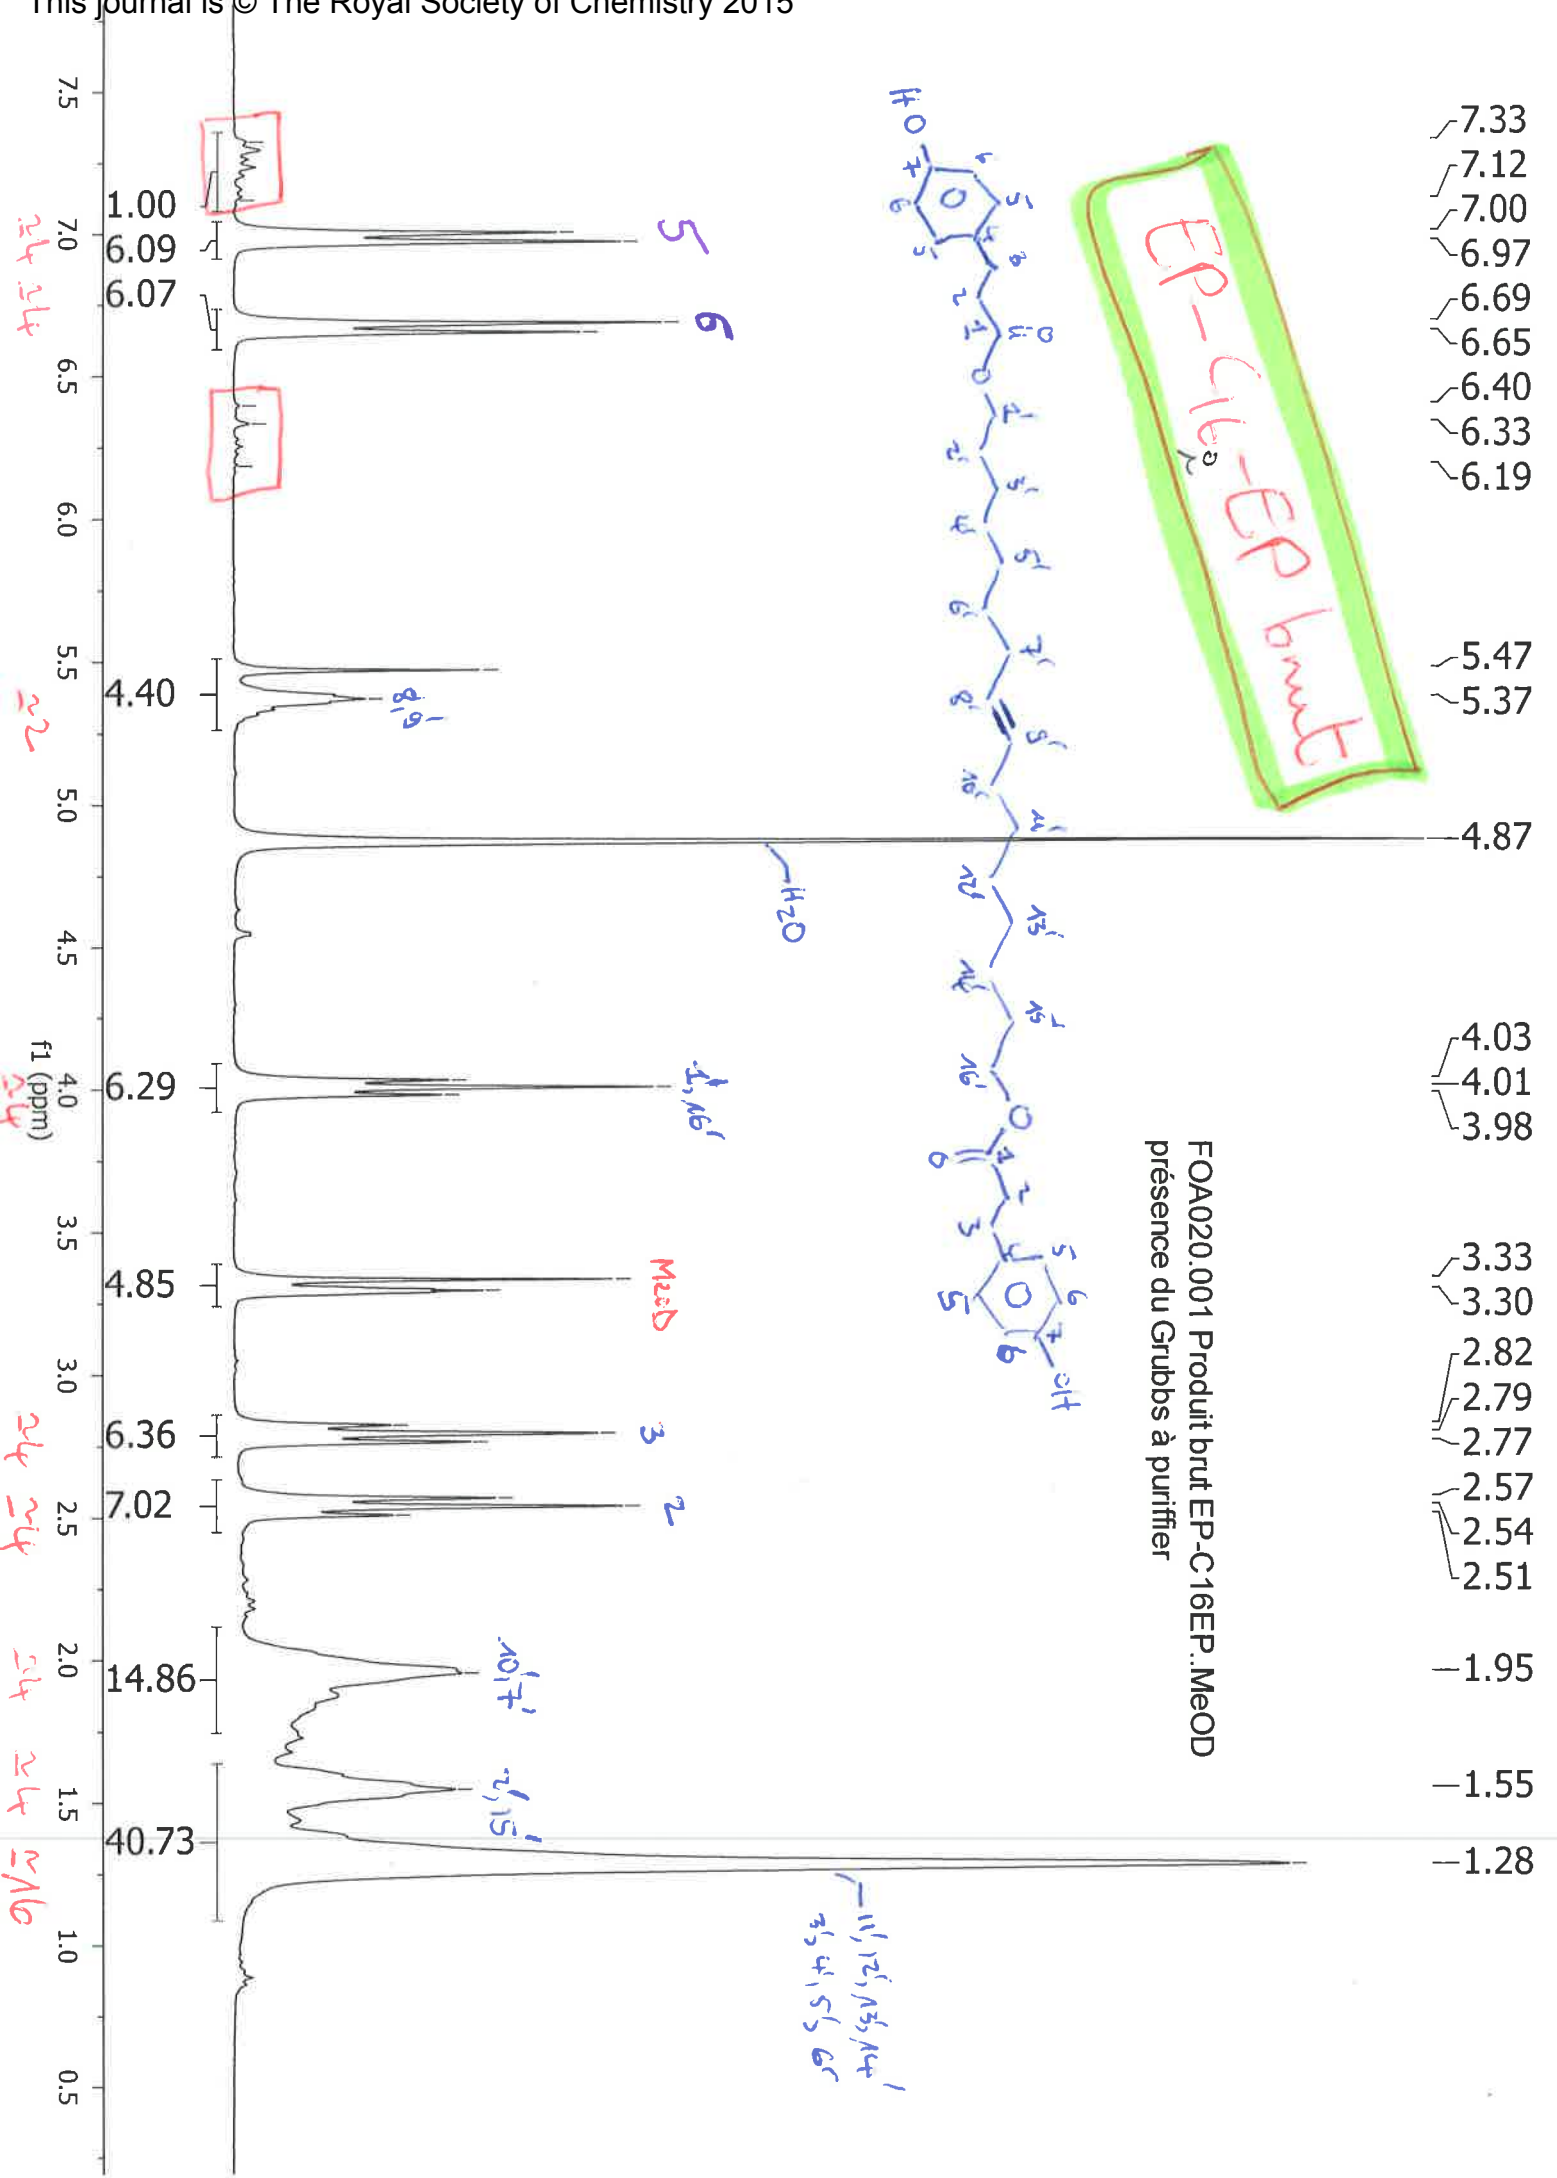

EP-C16-EP

FOA020.003 première tâche obtenue après purification... EP-C16-EP  
 MeOD... présence du Grubbs 1... à purifier

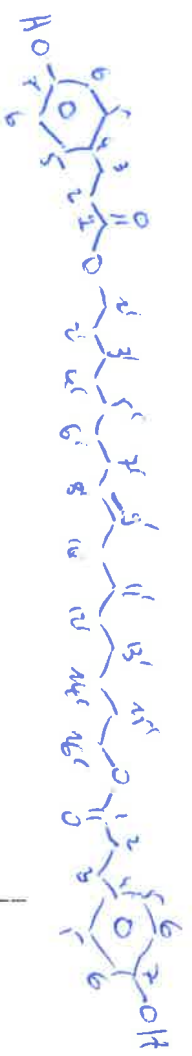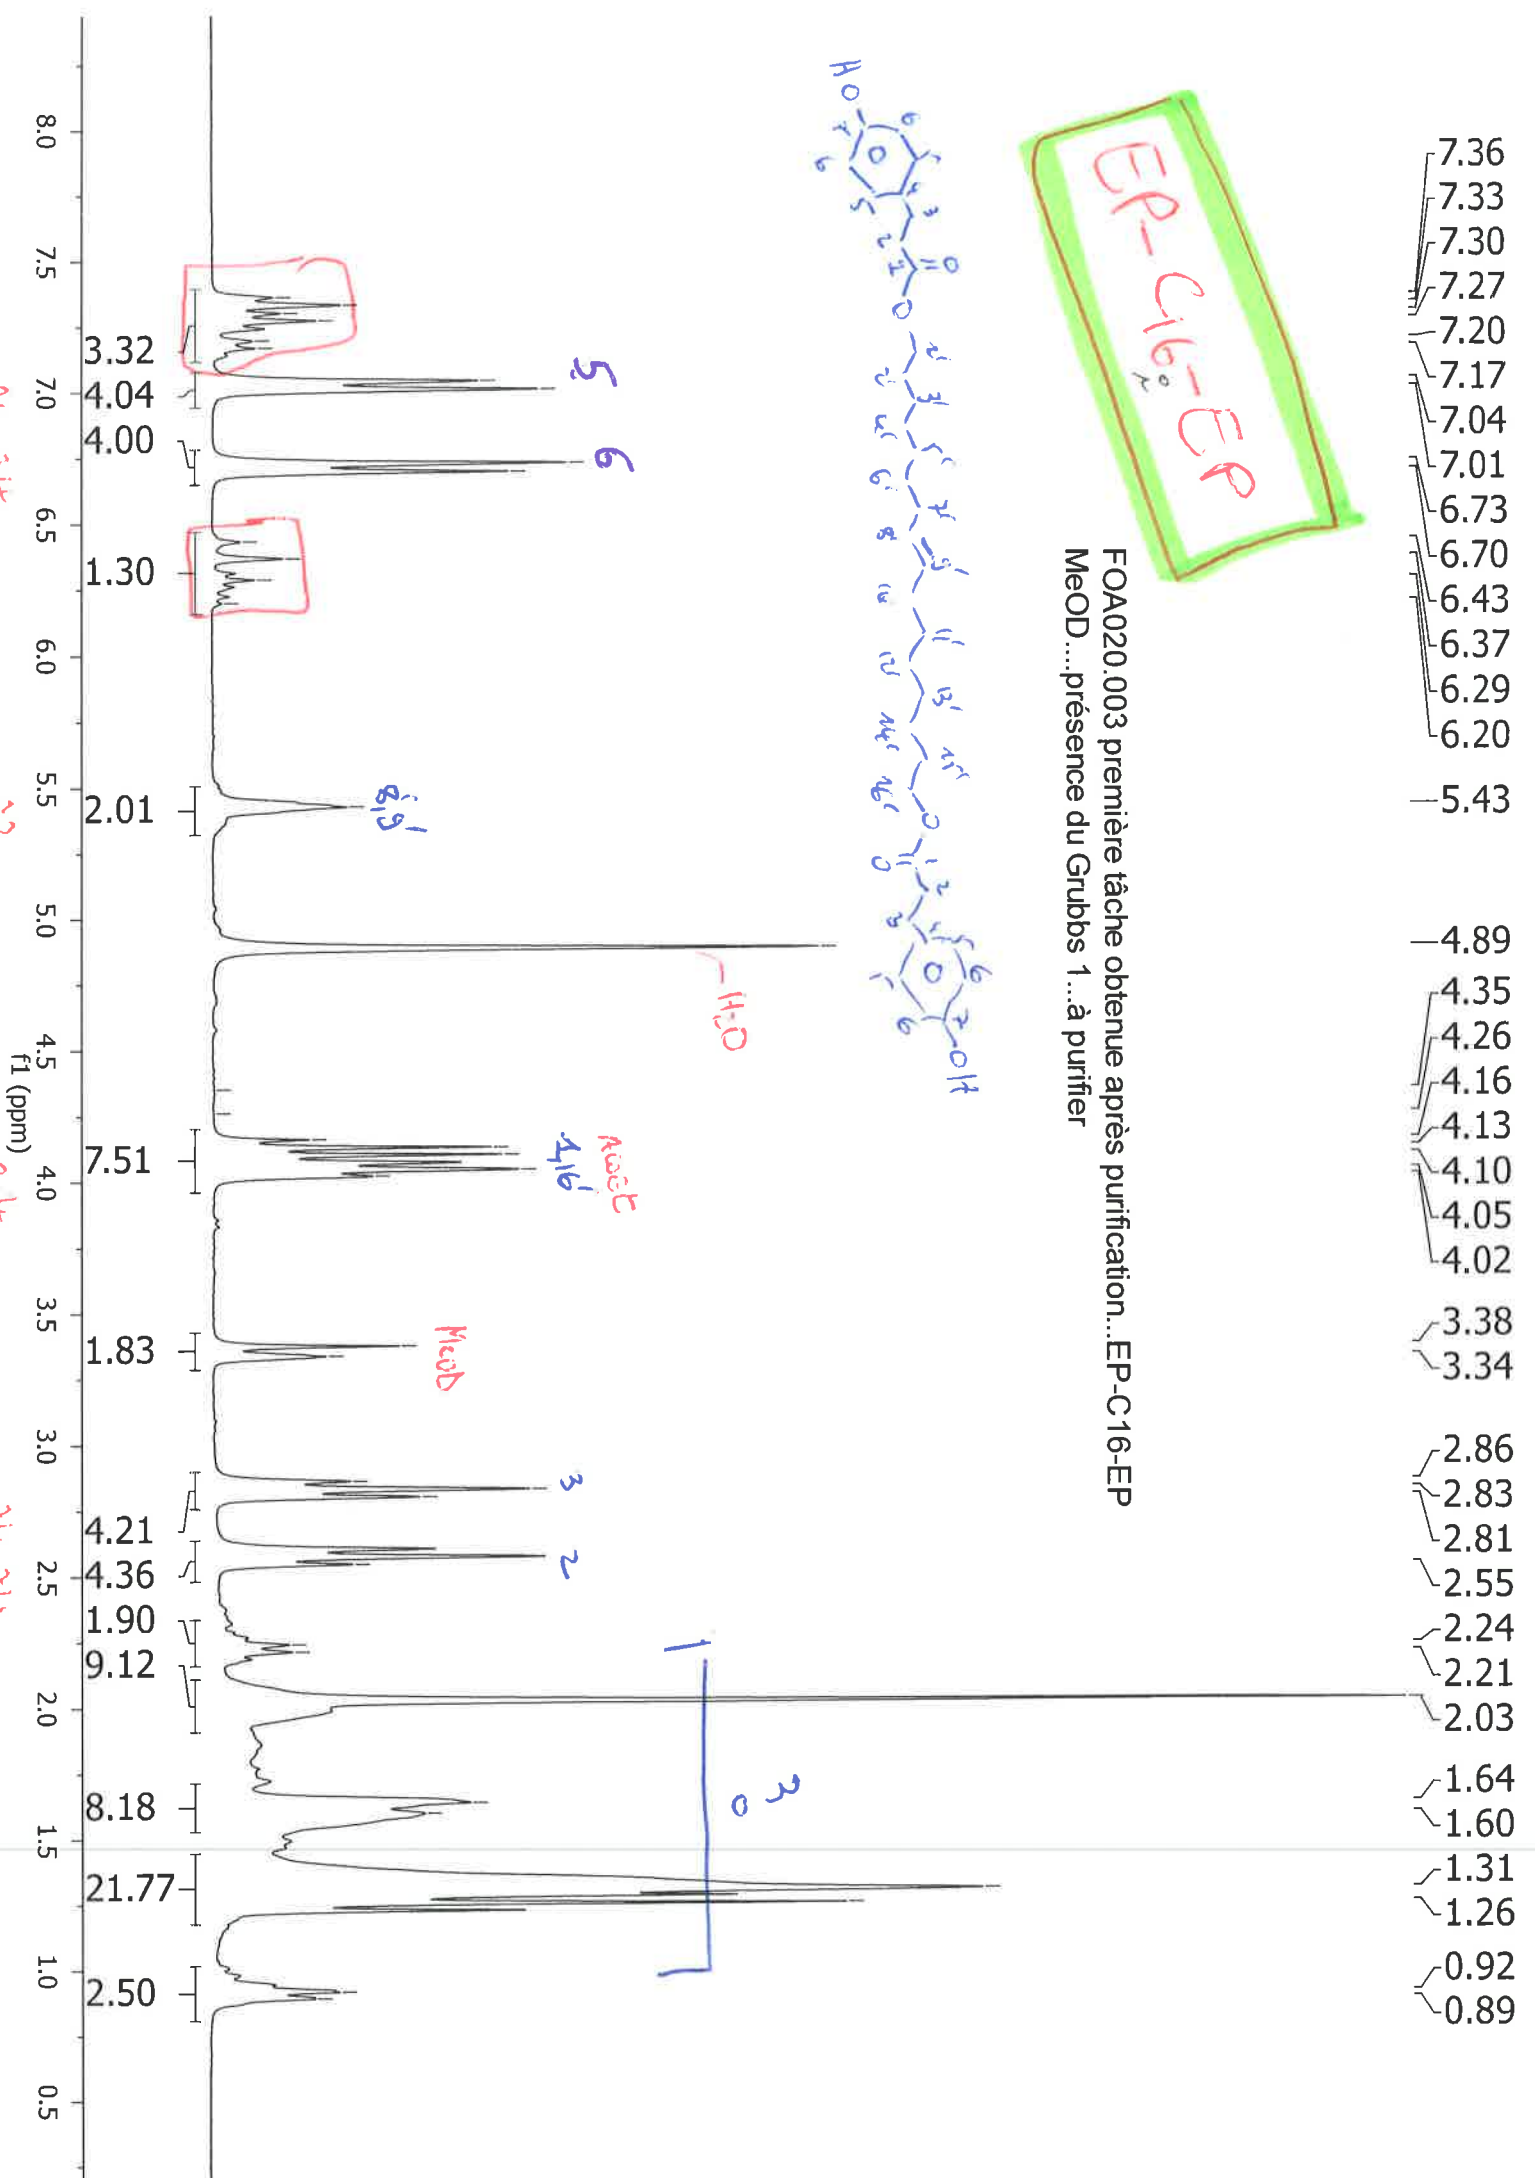

EP-C16-EP

FOA020.002 Deuxième tâche obtenue après purification sur colonne...EP-C16-EP  
 MeOD...on est parti de 800mg on obtient 450 mg

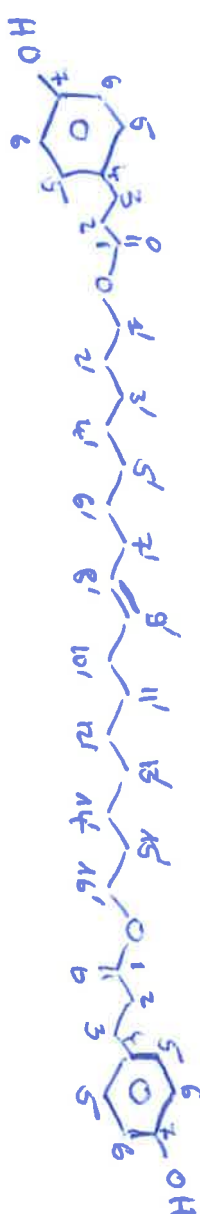

- 7.01
- 6.97
- 6.70
- 6.67
- 5.38
- 4.87
- 4.03
- 4.01
- 3.98
- 3.30
- 2.83
- 2.80
- 2.77
- 2.57
- 2.54
- 2.51
- 2.00
- 1.55
- 1.27

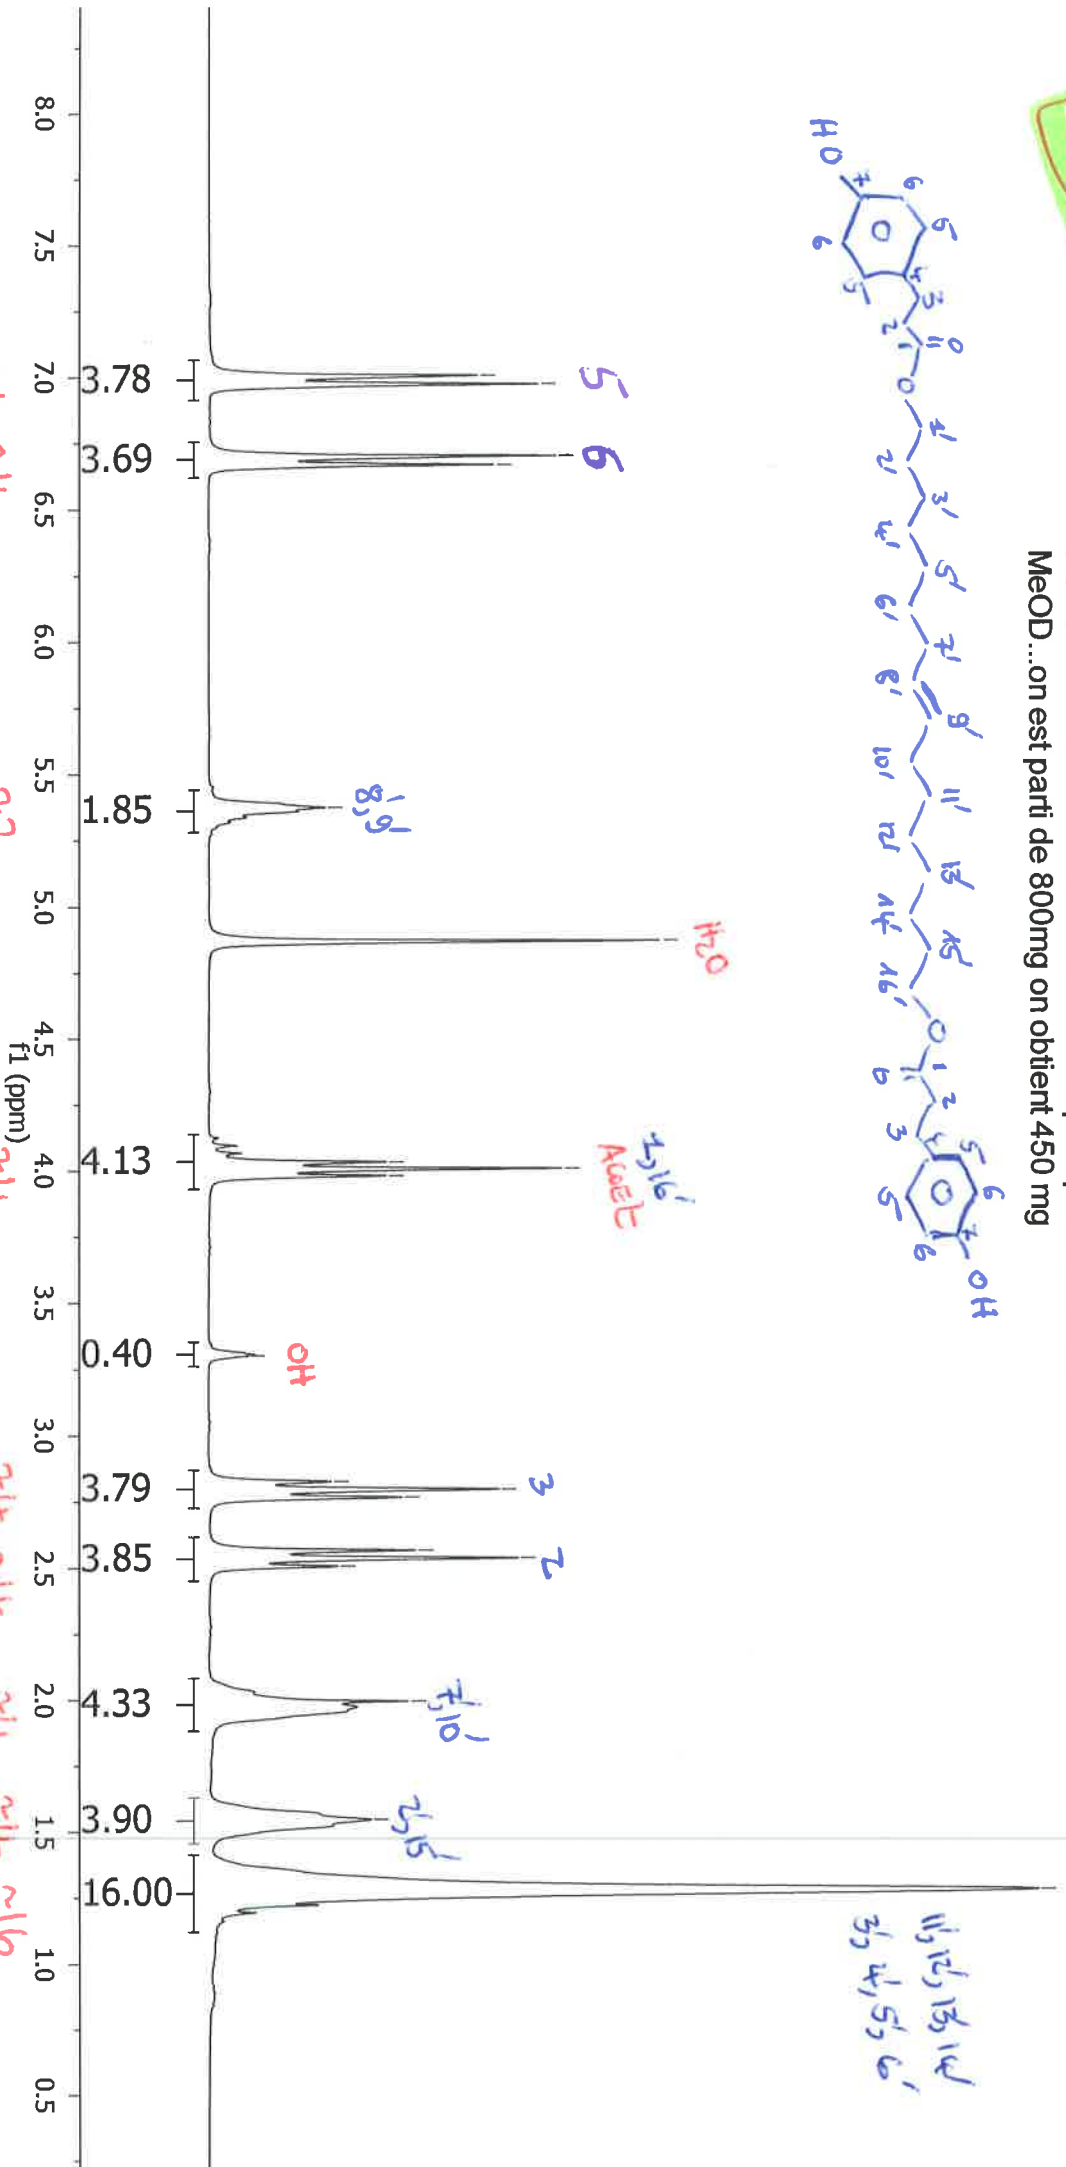

24 24

22

24

24 24

24

24 24

216

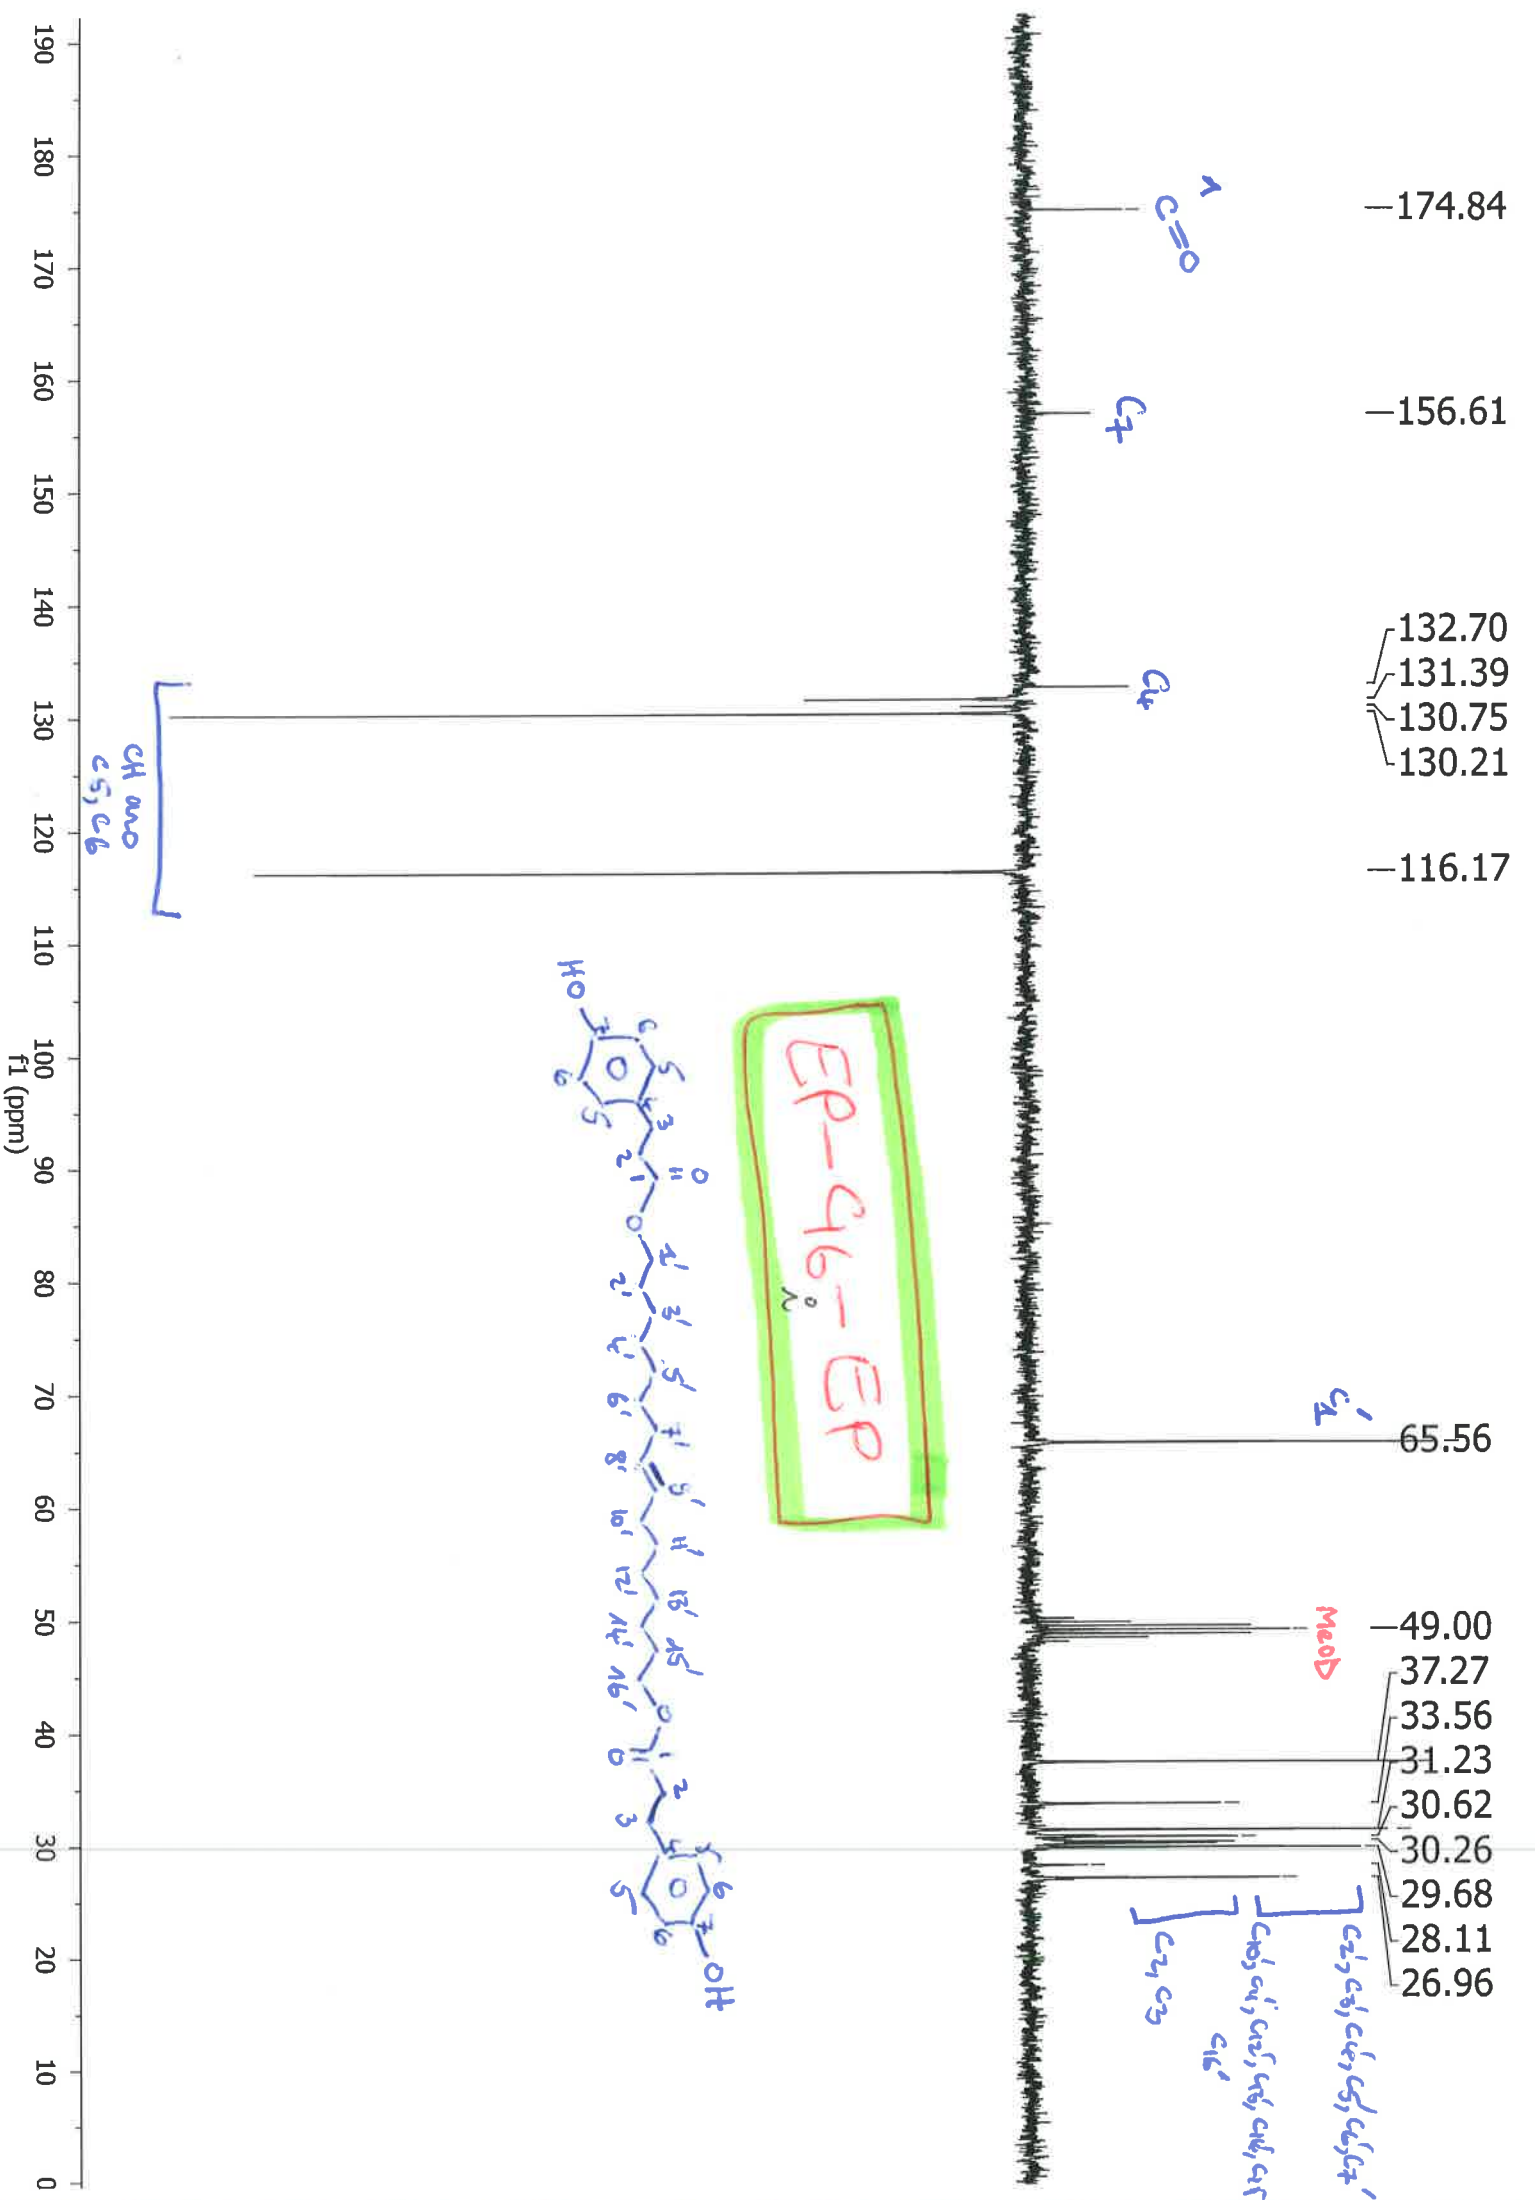

Supplement: c5gc00448a8.pdf [file c5gc00448a8.pdf]
