# Supplementary material for: Efficient syntheses of bolaform surfactants froml-rhamnose and/or 3-(4-hydroxyphenyl)propionic acid
Source: Royal Society of Chemistry journal article supplement (doi:10.1039/c5gc00448a), 2015-01-01
Supplement: c5gc00448a9.pdf [file c5gc00448a9.pdf]

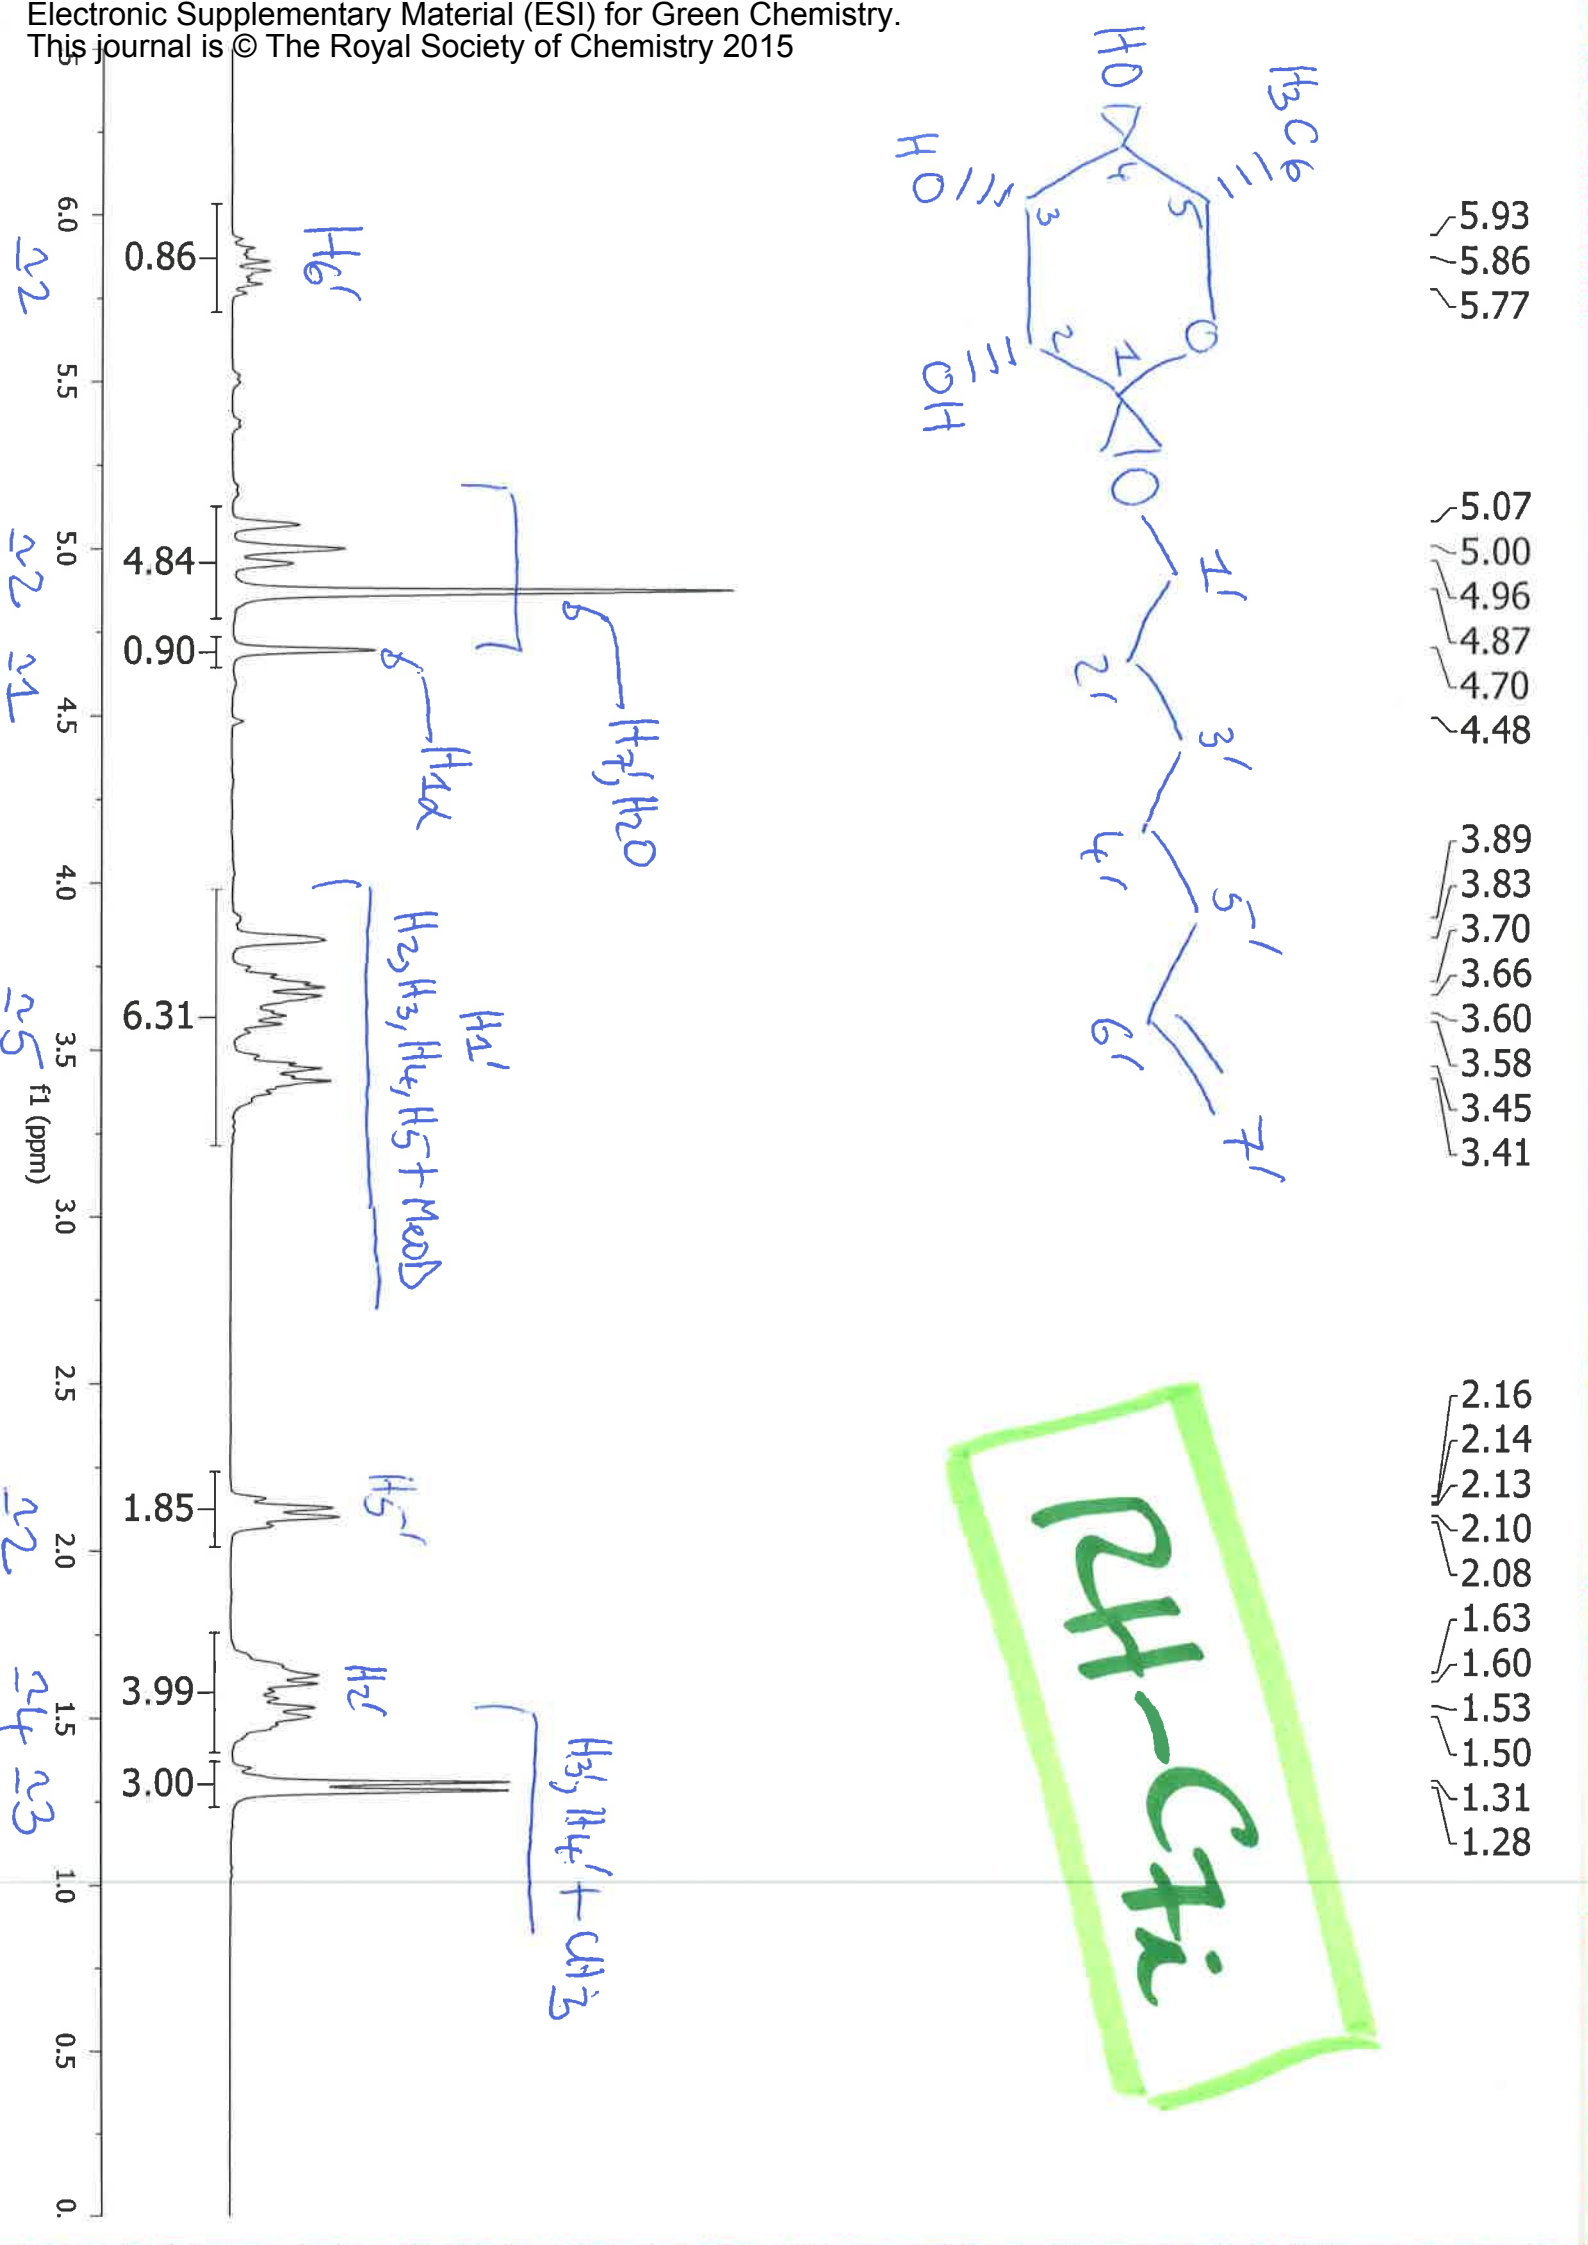

FOA043 RMN 13C  
produit brun visqueux soluble  
dans le MeOD ....RH-C7i

**RH-C7i**

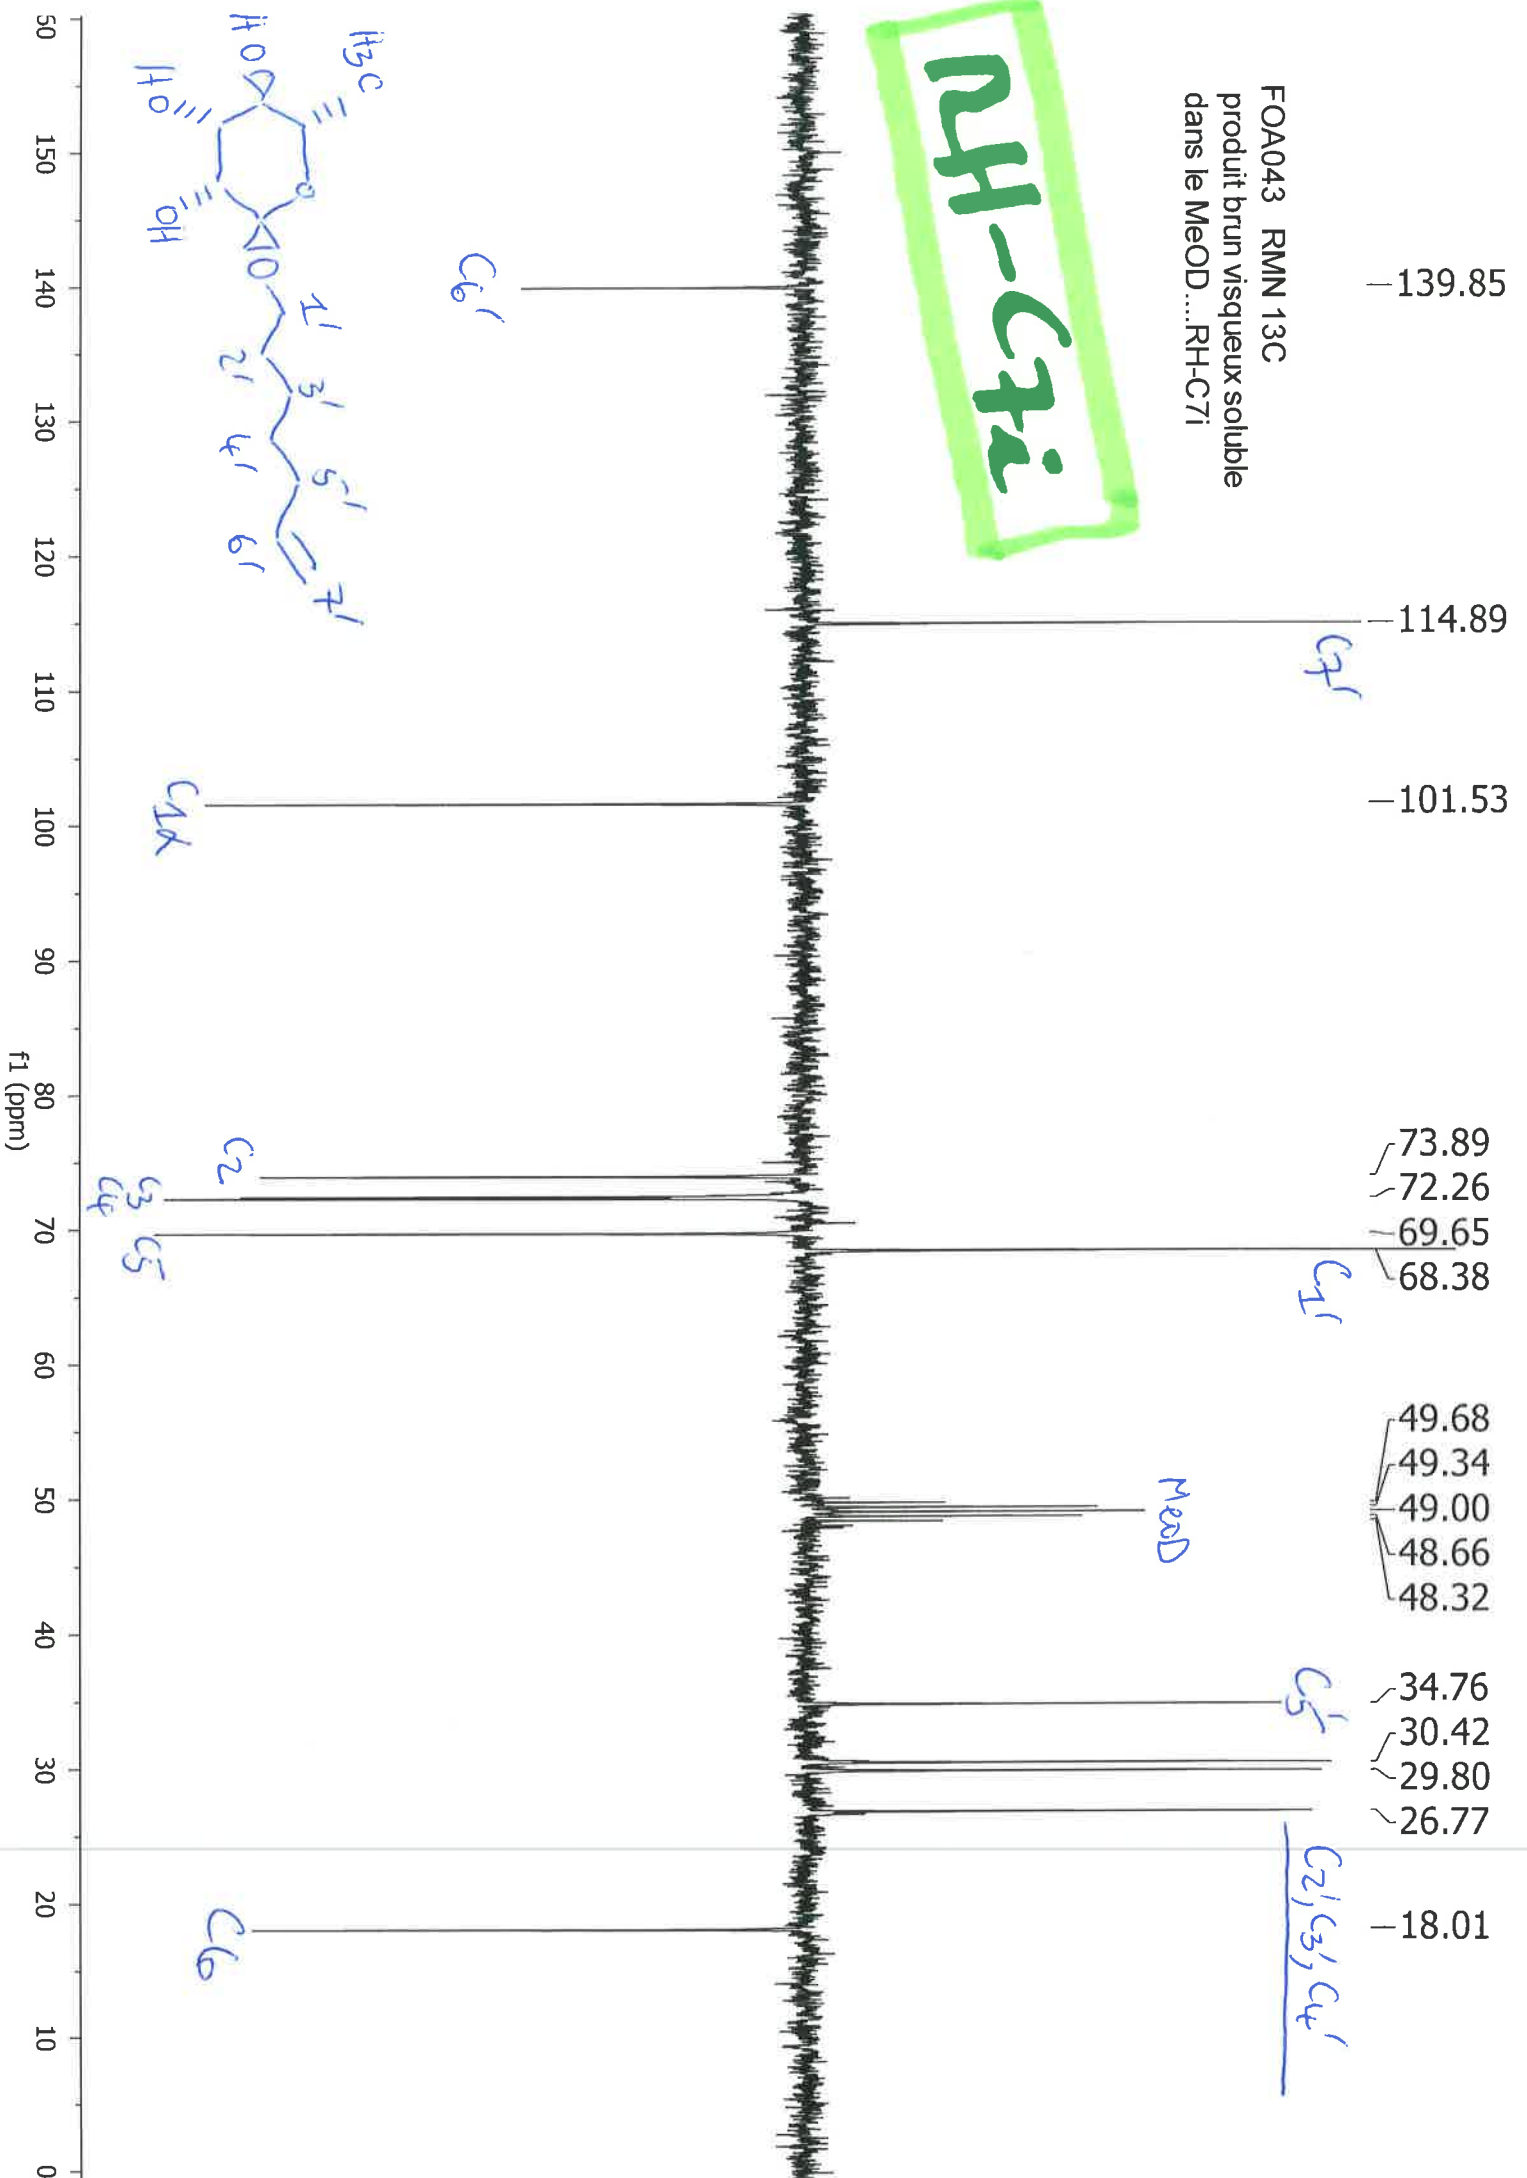

Analyse Administrator  
Date lundi 23 mars 2015 20:53

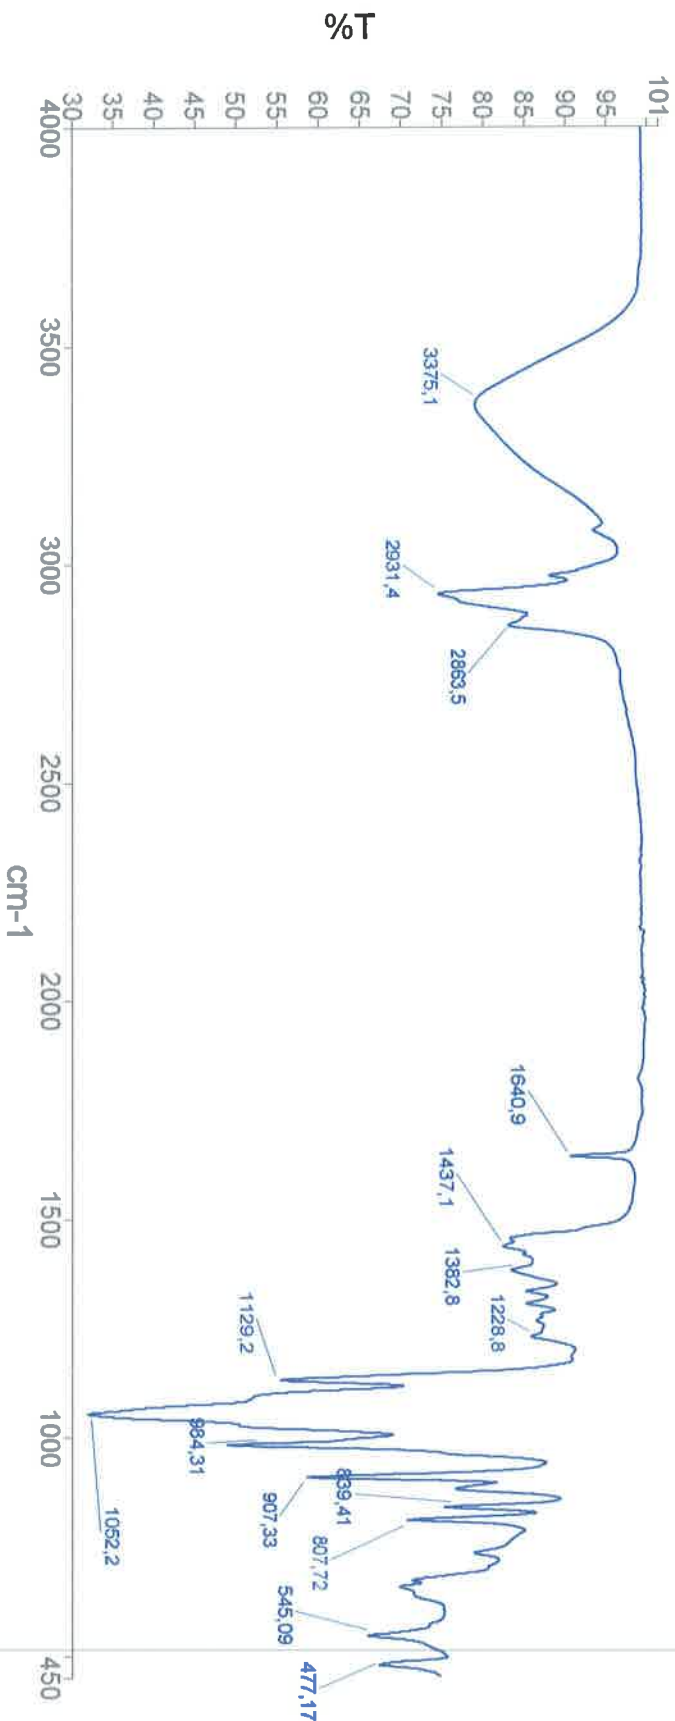

| Nom de l'échantillon | Description                                                | Trajet Optique (mm) |
|----------------------|------------------------------------------------------------|---------------------|
| RHC7I                | Echantillon 002 Par Administrator Date lundi, mars 23 2015 | 1                   |
