# Supplementary material for: Efficient syntheses of bolaform surfactants froml-rhamnose and/or 3-(4-hydroxyphenyl)propionic acid
Source: Royal Society of Chemistry journal article supplement (doi:10.1039/c5gc00448a), 2015-01-01
Supplement: c5gc00448a10.pdf [file c5gc00448a10.pdf]

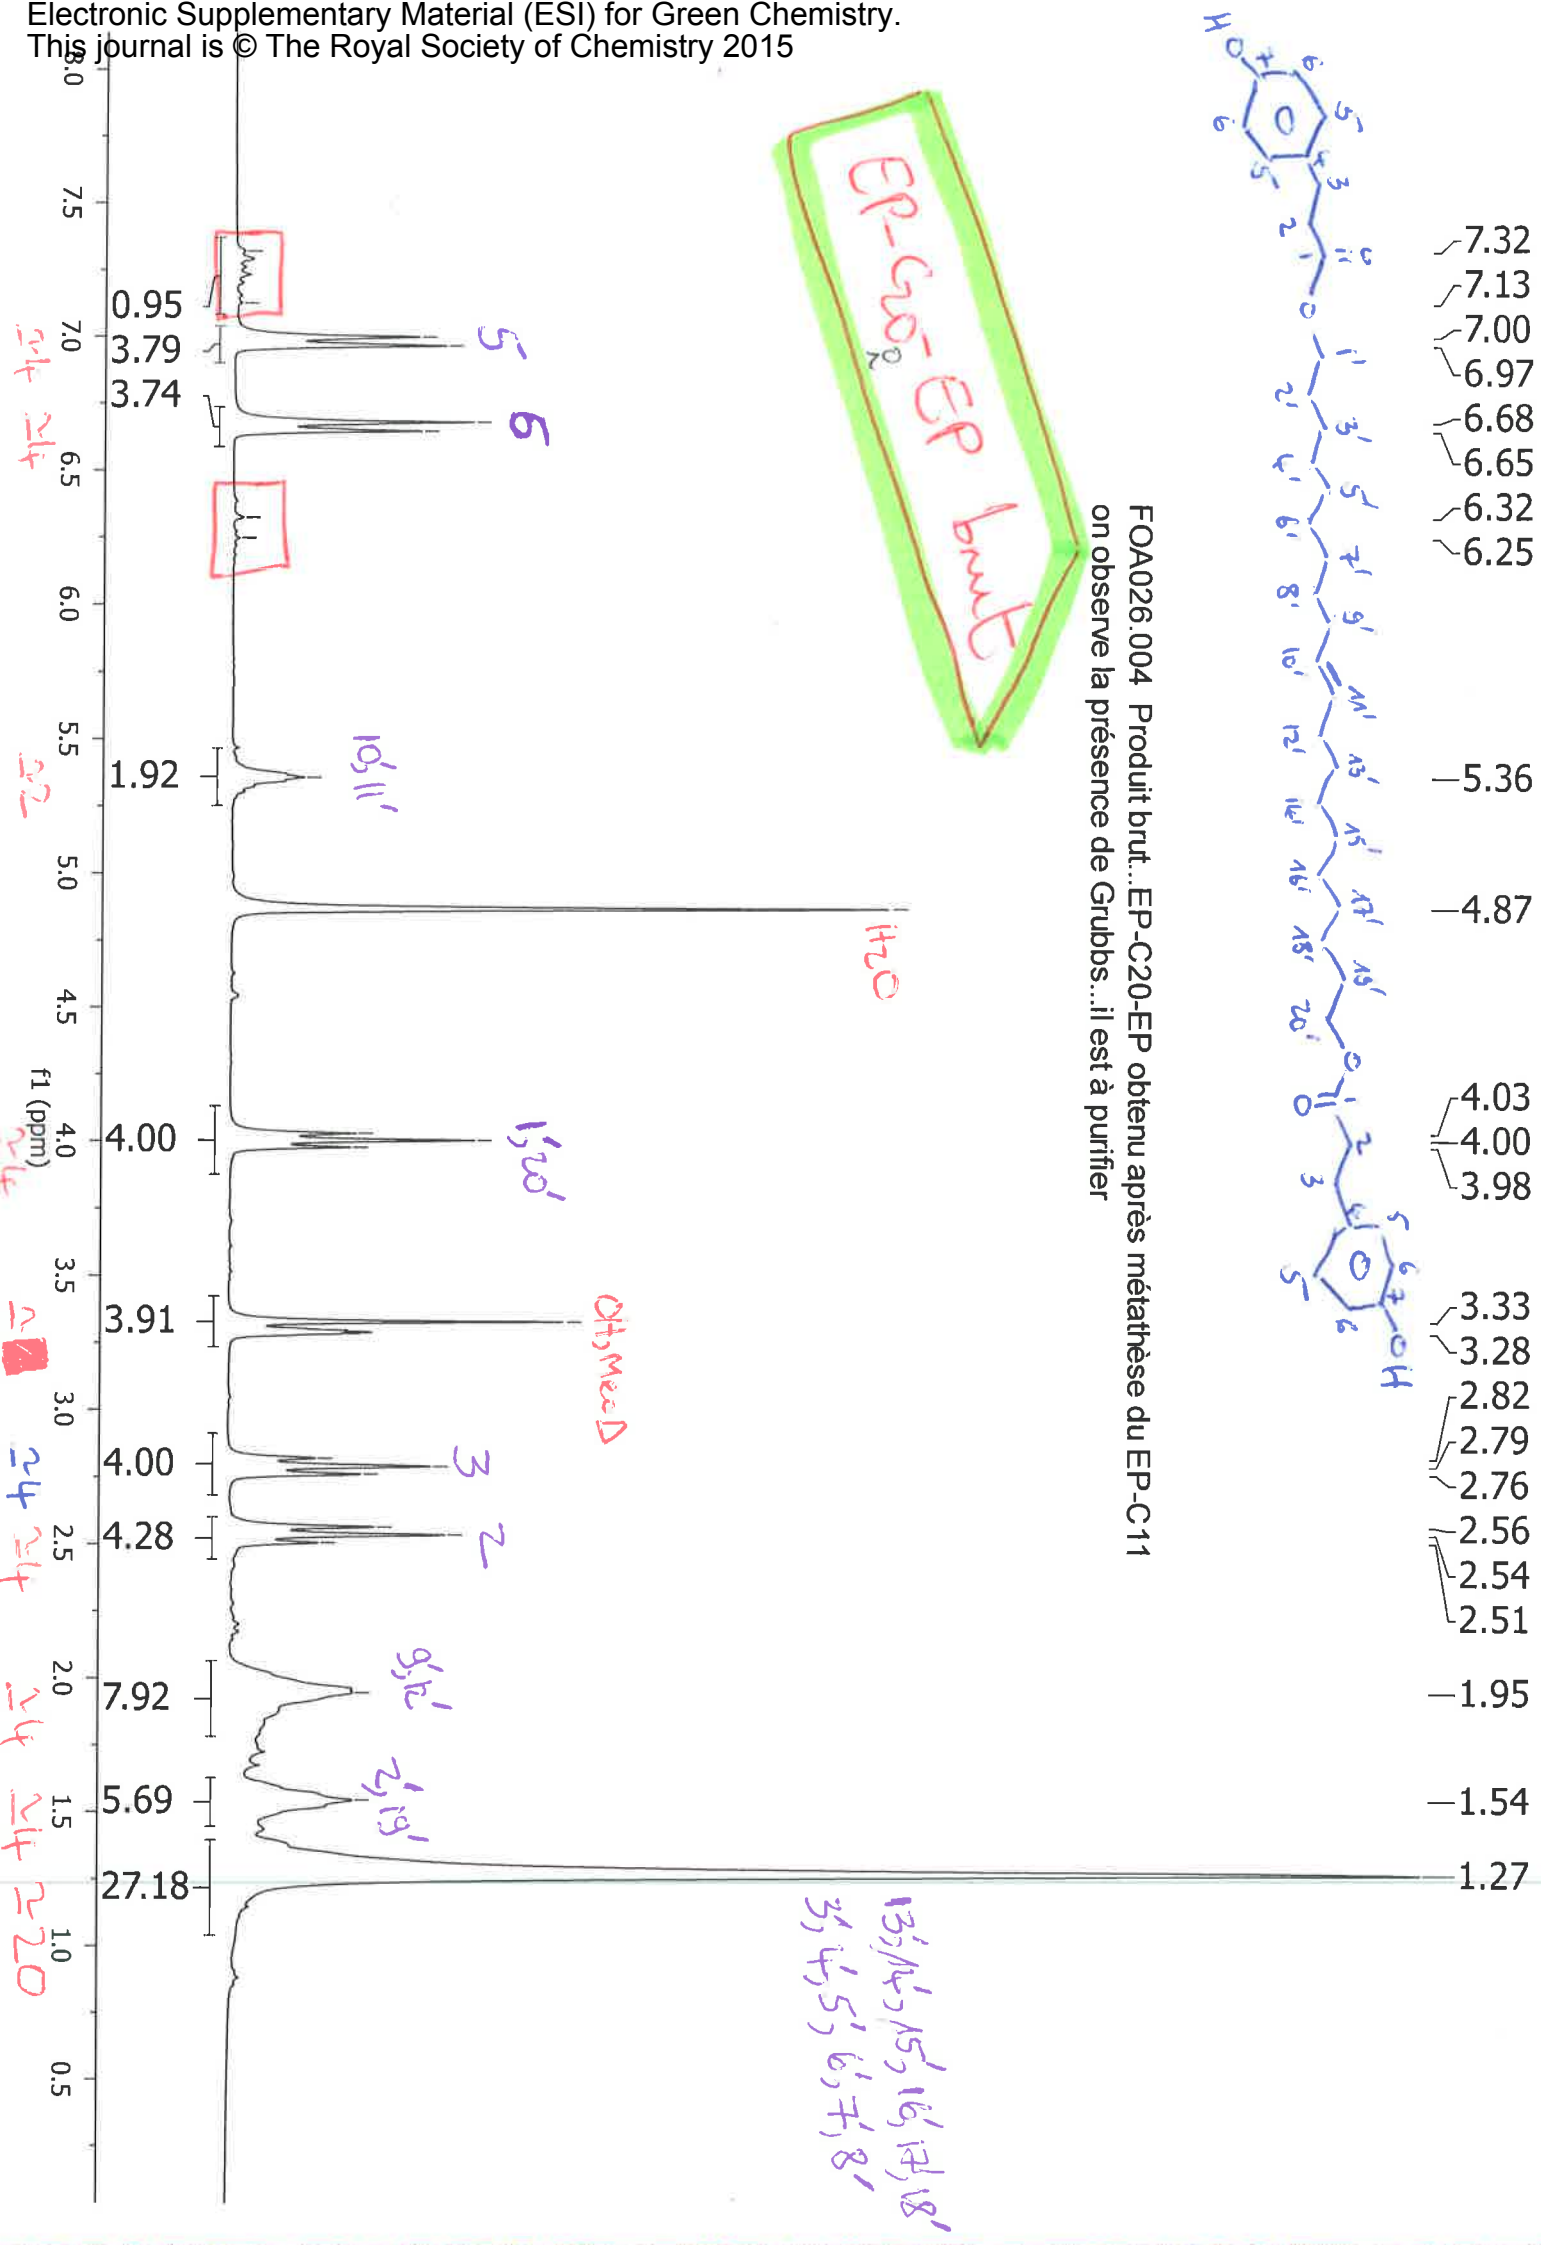

FOA026.005 Produit désiré...EP-C20-EP...obtenu après purification sur chromatographie sur colonne soluble dans le MeOD

- 7.00
- 6.96
- 6.69
- 6.66
- 5.36
- 4.87
- 4.03
- 4.00
- 3.98
- 3.34
- 3.30
- 2.82
- 2.79
- 2.76
- 2.56
- 2.53
- 2.50
- 1.97
- 1.54
- 1.27

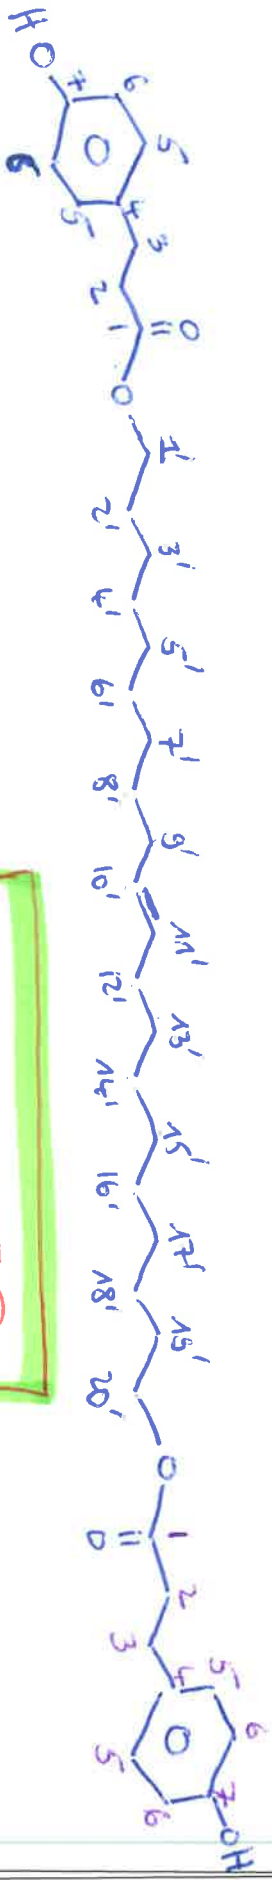

EP-C20-EP

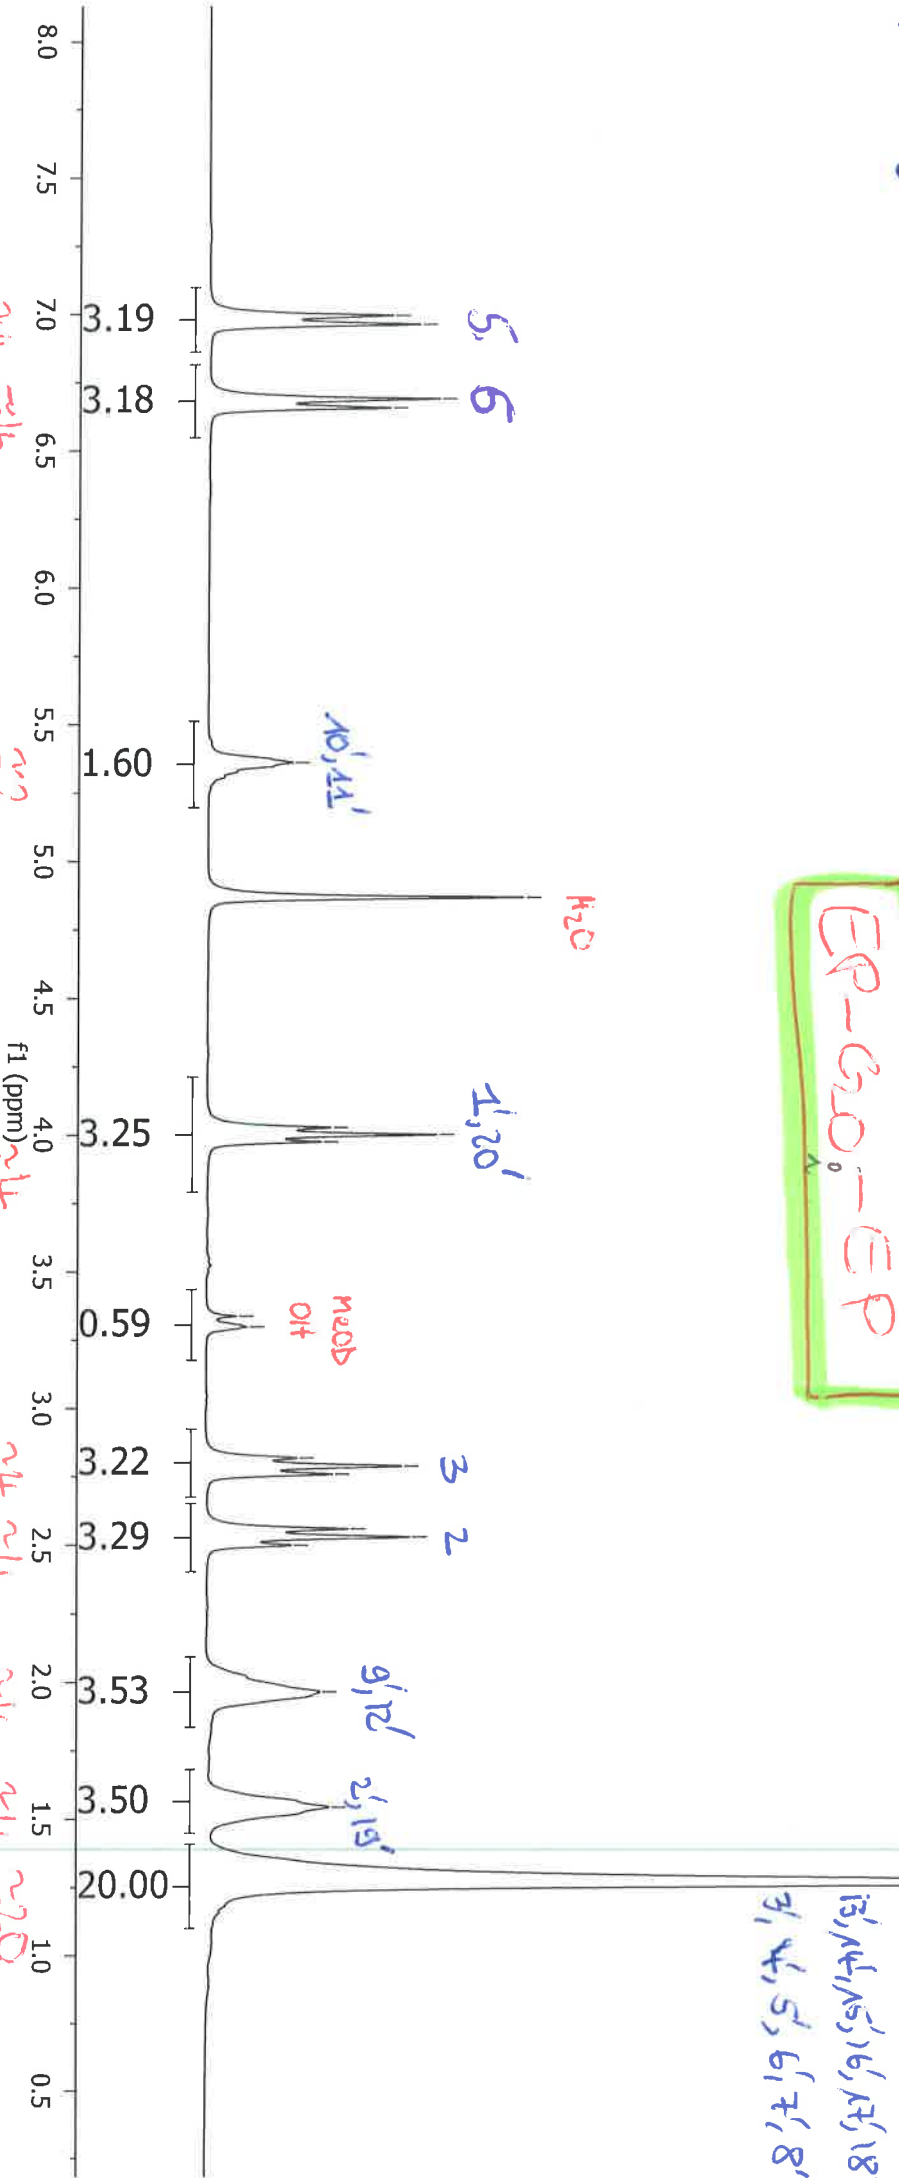



Analyste Administrator  
Date lundi 23 mars 2015 21:36

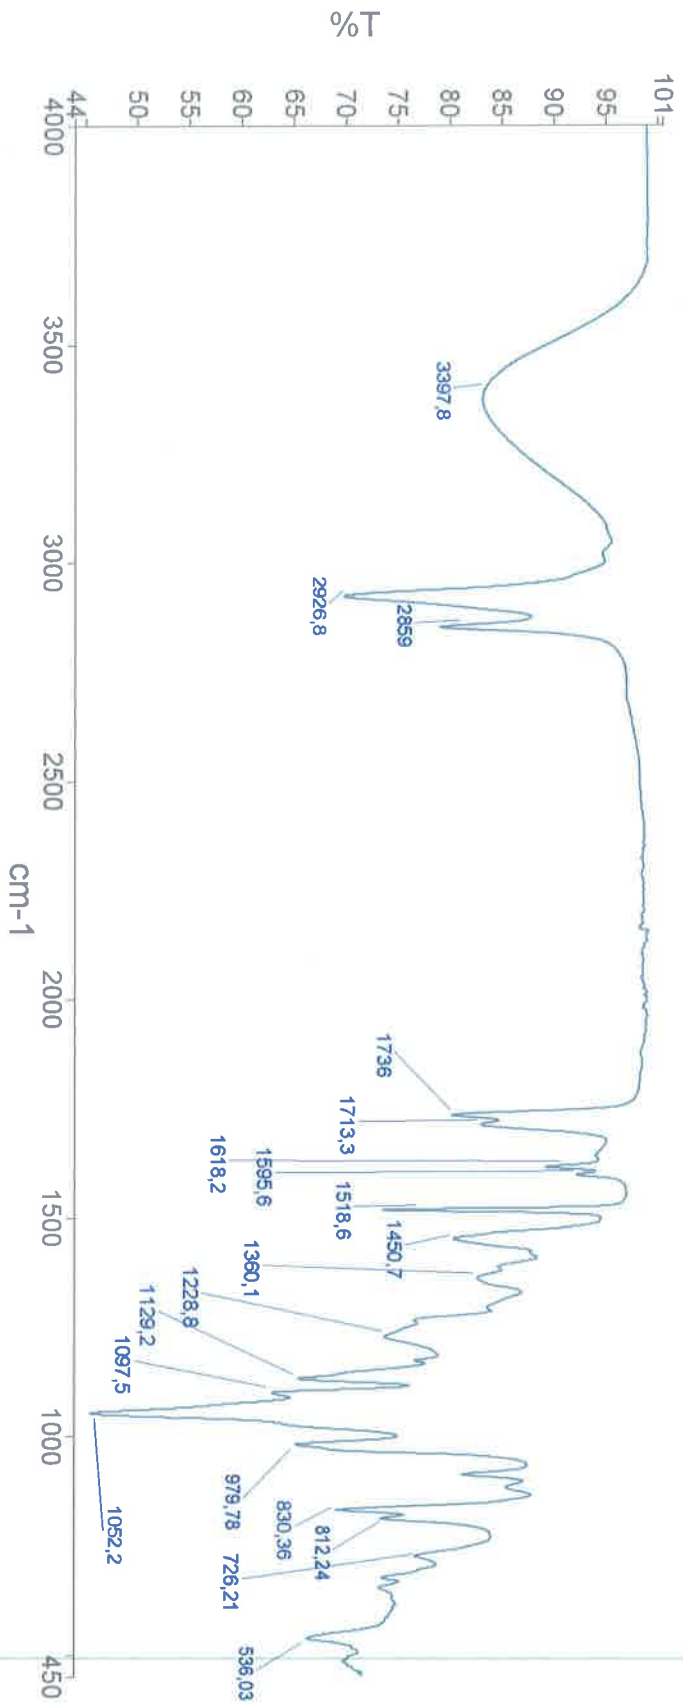

| Nom de l'échantillon | Description                                                | Trajet Optique (mm) |
|----------------------|------------------------------------------------------------|---------------------|
| RHC16IEP             | Echantillon 007 Par Administrator Date lundi, mars 23 2015 | 1                   |
