# Supplementary material for: Efficient syntheses of bolaform surfactants froml-rhamnose and/or 3-(4-hydroxyphenyl)propionic acid
Source: Royal Society of Chemistry journal article supplement (doi:10.1039/c5gc00448a), 2015-01-01
Supplement: c5gc00448a11.pdf [file c5gc00448a11.pdf]

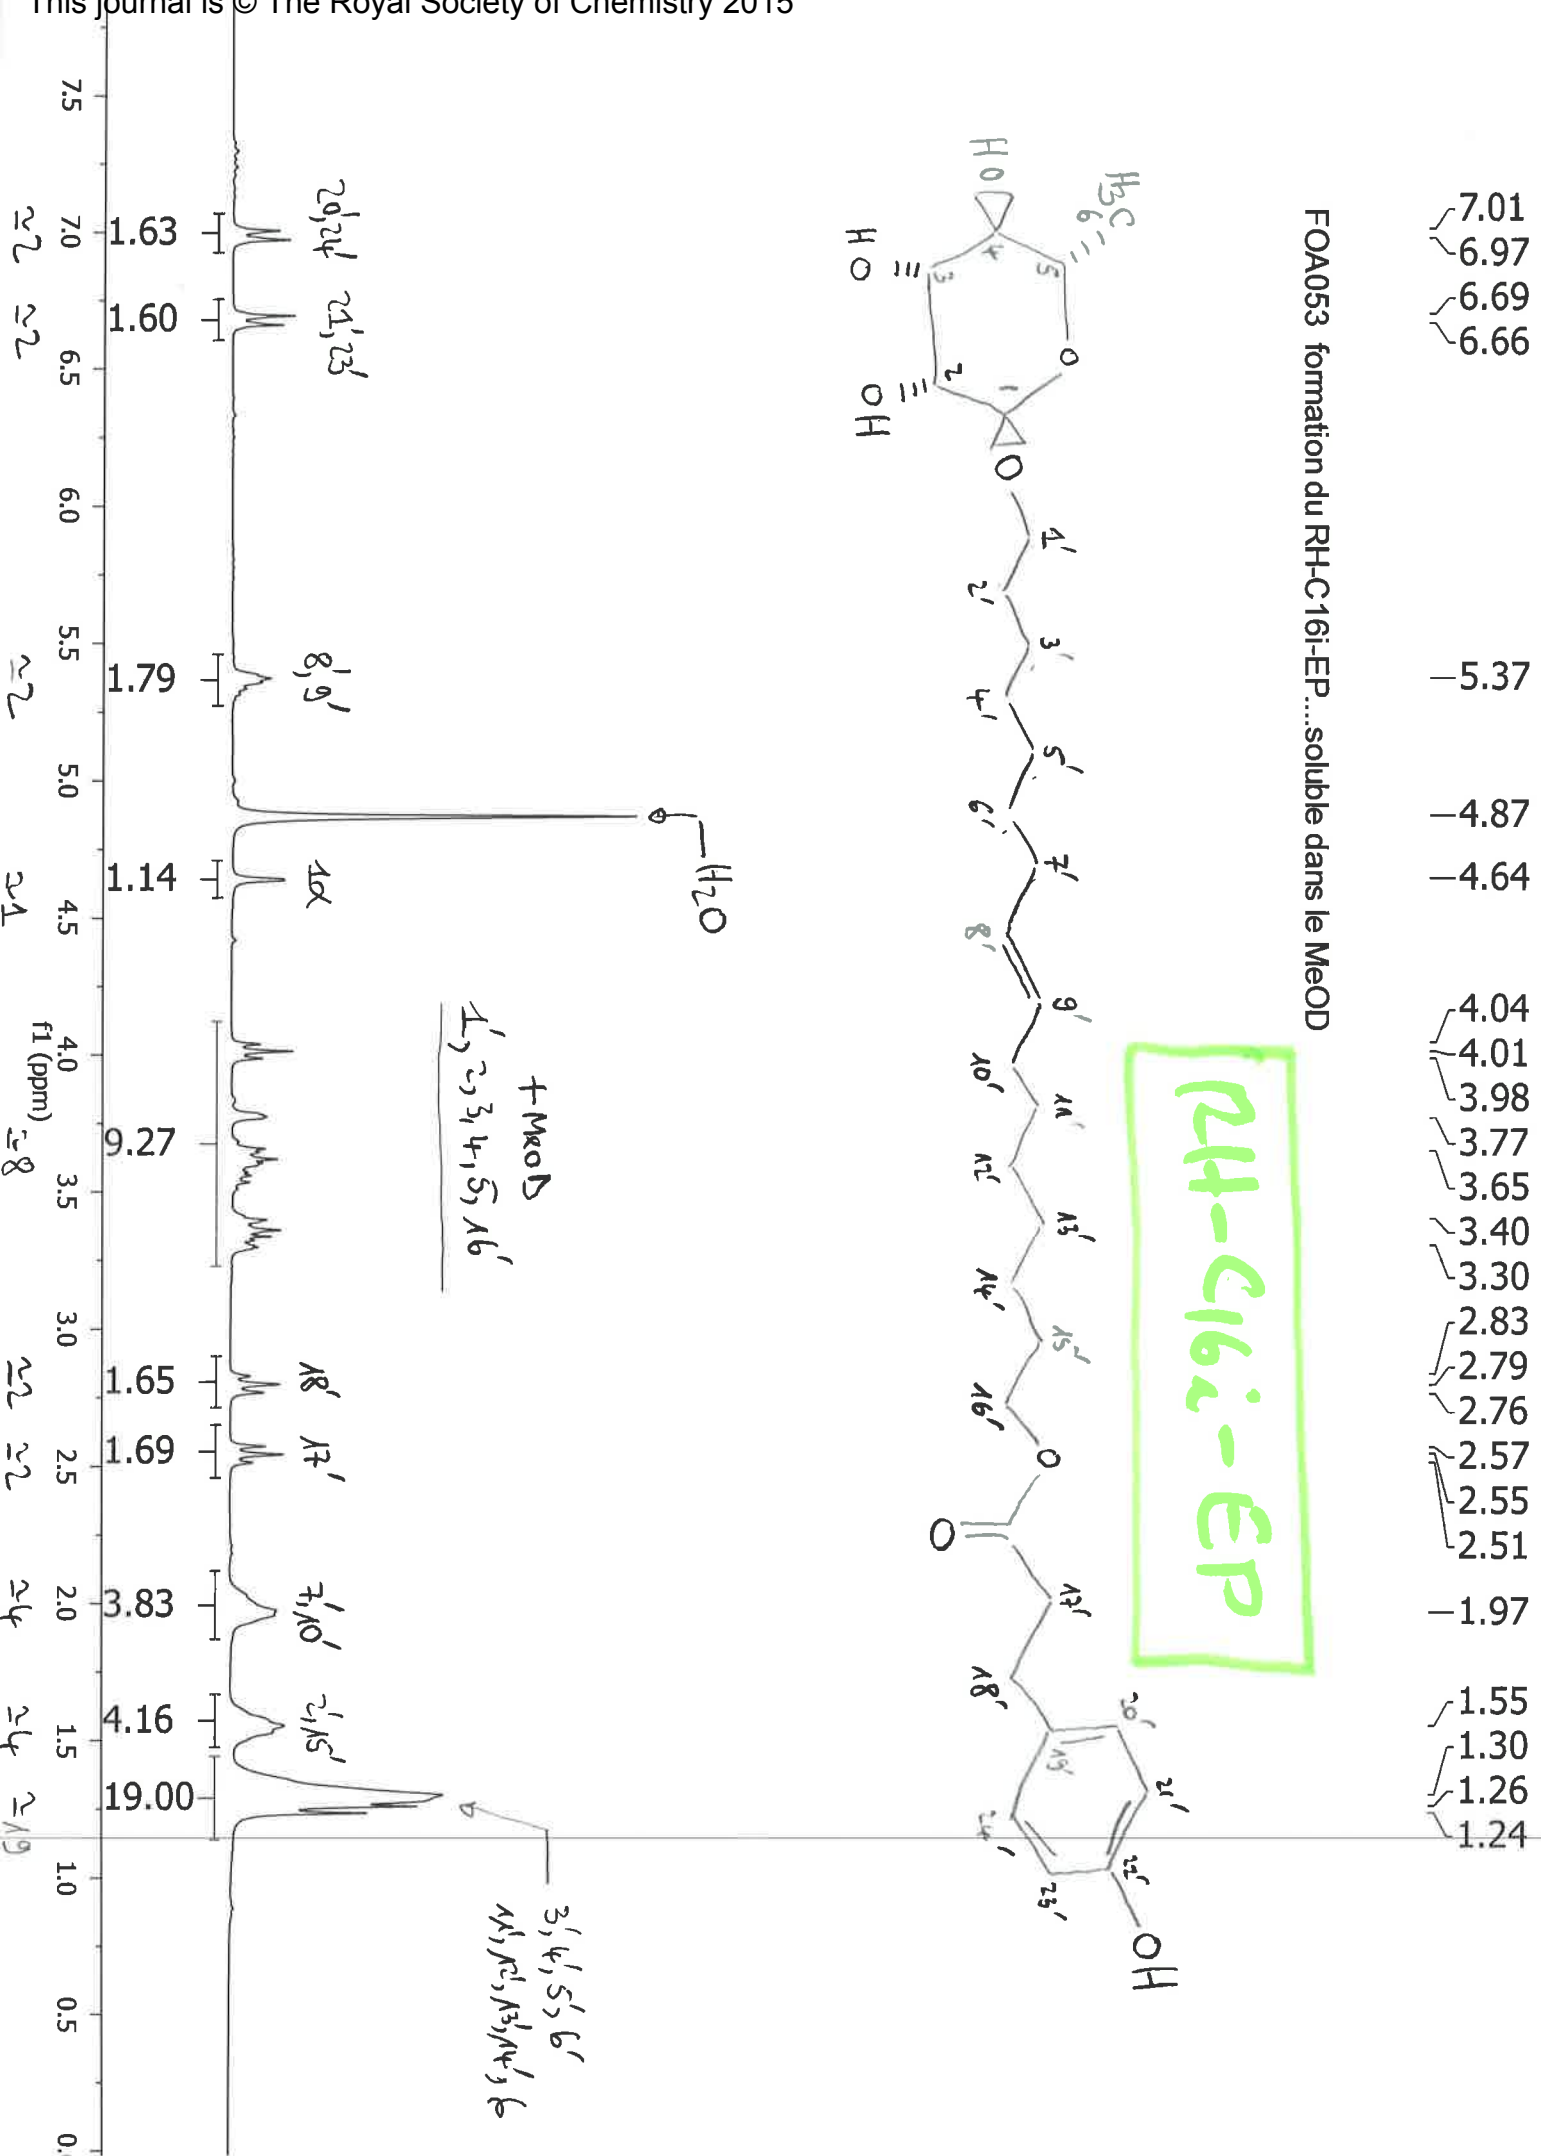

FOA053 formation du RH-C16i-RH...soluble MeOD

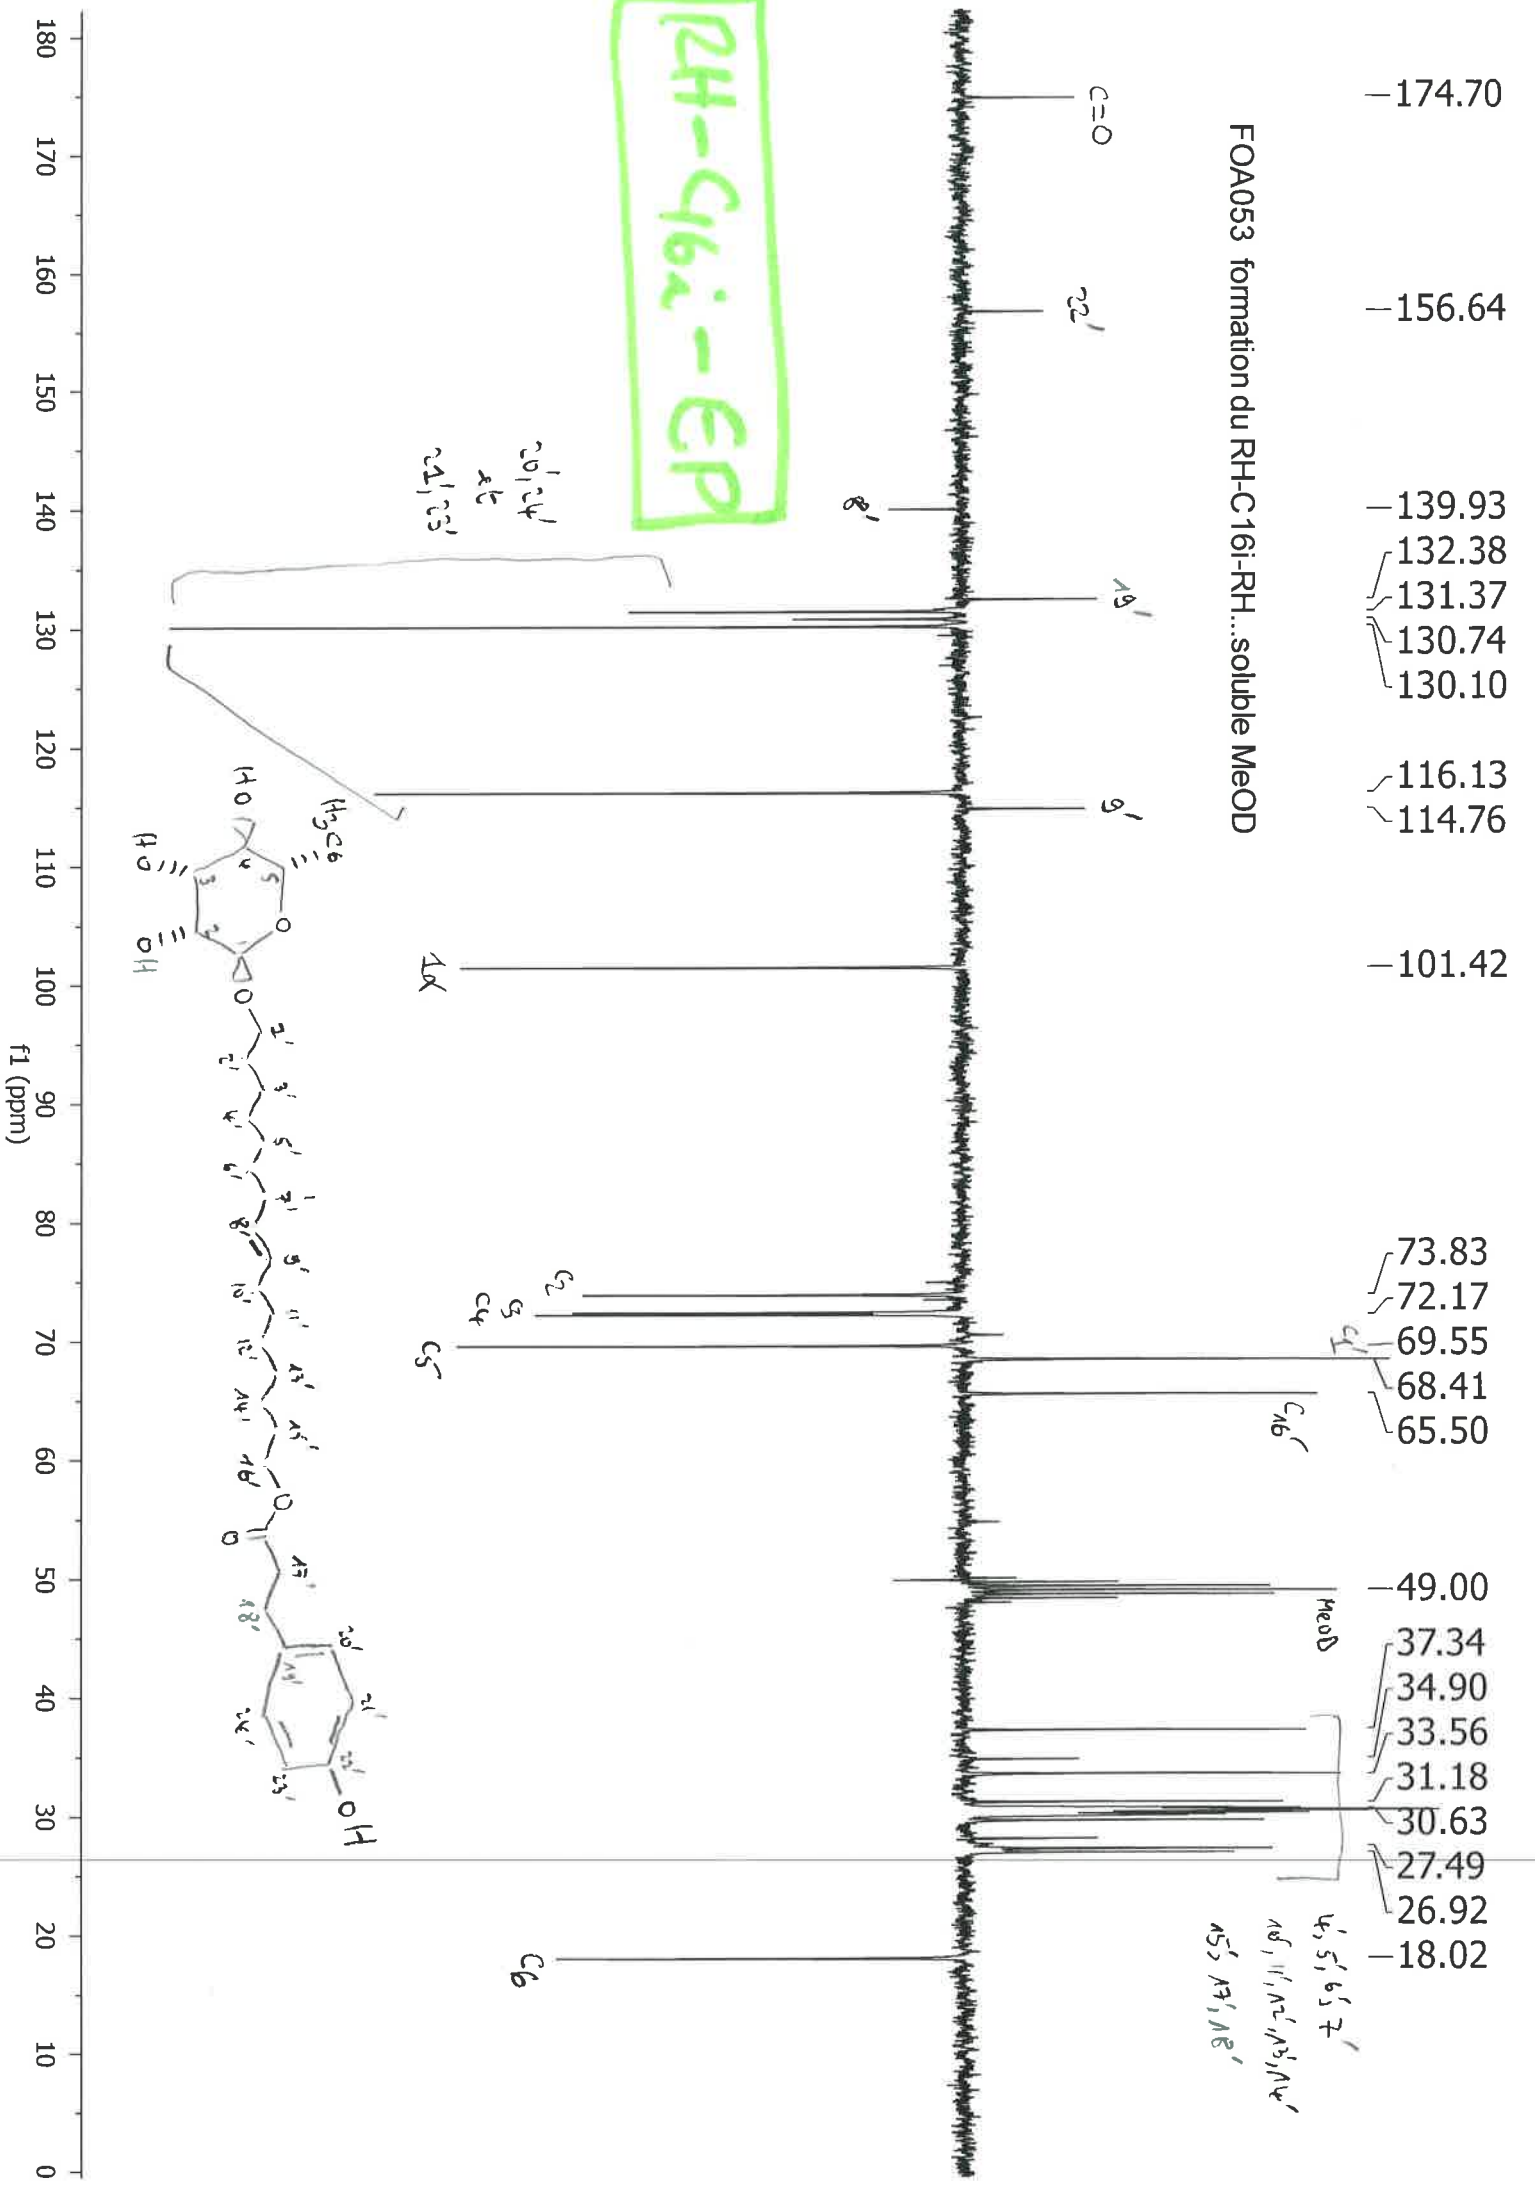

**RH-C16i-EP**

Analyse  
Date

Administrator  
lundi 23 mars 2015 21:36

PerkinElmer Spectrum Version 10.4.2  
lundi 23 mars 2015 21:36

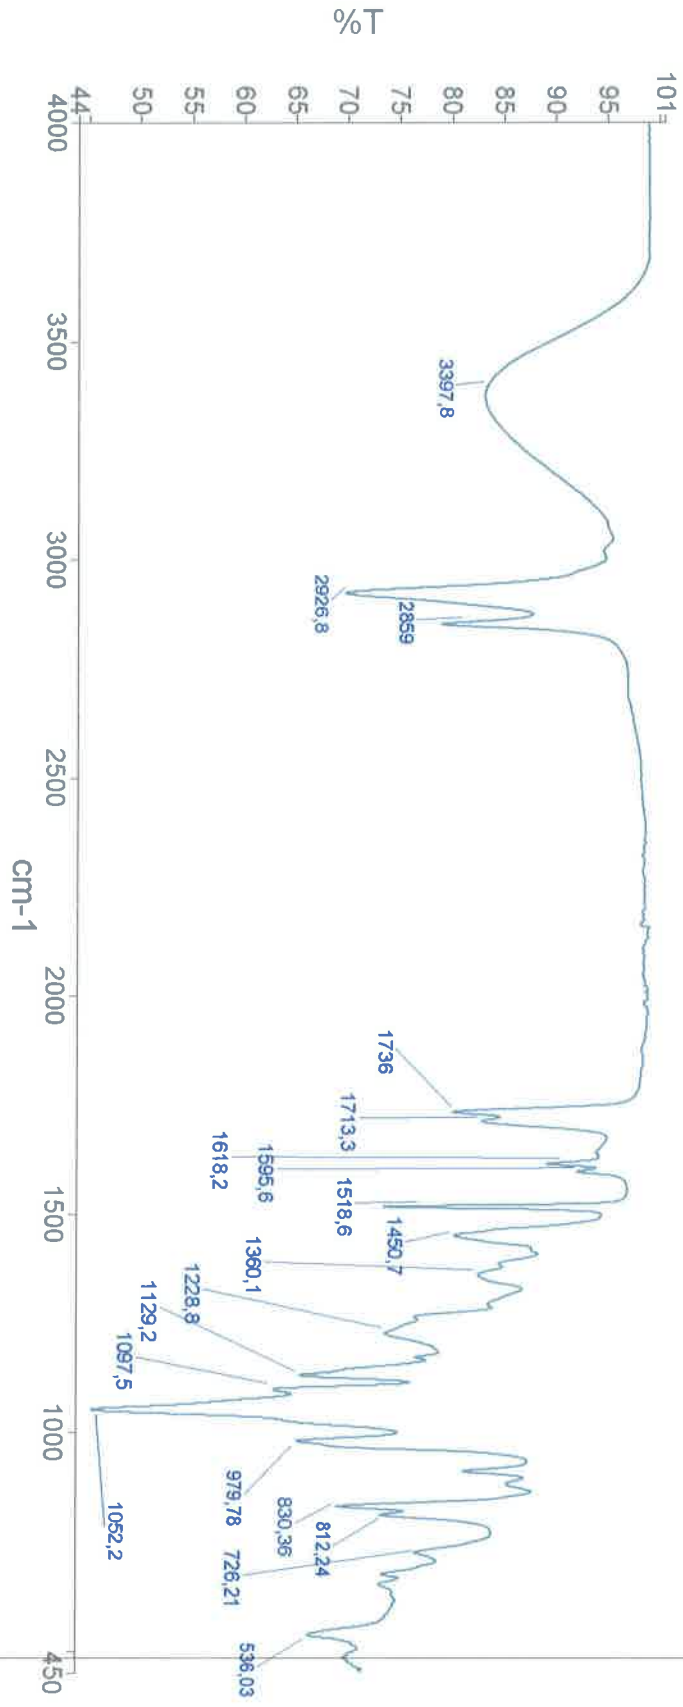

| Nom de l'échantillon | Description                                                | Trajet Optique (mm) |
|----------------------|------------------------------------------------------------|---------------------|
| RHC16IEP             | Echantillon 007 Par Administrator Date lundi, mars 23 2015 | 1                   |

|      |
|------|
| 7.02 |
| 6.99 |
| 6.72 |
| 6.70 |
| 5.48 |
| 5.39 |
| 4.87 |
| 4.68 |
| 4.06 |
| 4.04 |
| 4.01 |
| 3.82 |
| 3.68 |
| 3.64 |
| 3.59 |
| 3.57 |
| 3.43 |
| 3.40 |
| 3.36 |
| 2.85 |
| 2.82 |
| 2.79 |
| 2.59 |
| 2.56 |
| 2.53 |
| 2.00 |
| 1.58 |
| 1.31 |
| 1.27 |

FOA041 Enantiomere fächer abtrennen ohne permutikation von ophanen --- MeOD --- R<sub>1</sub>-C<sub>18</sub>-EP

**2H-4R<sub>1</sub>-EP**

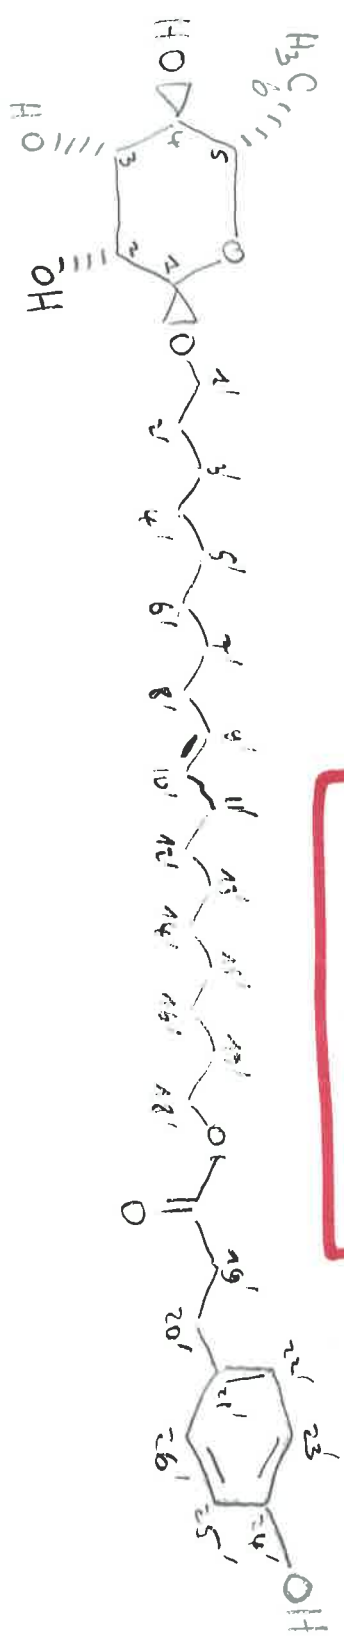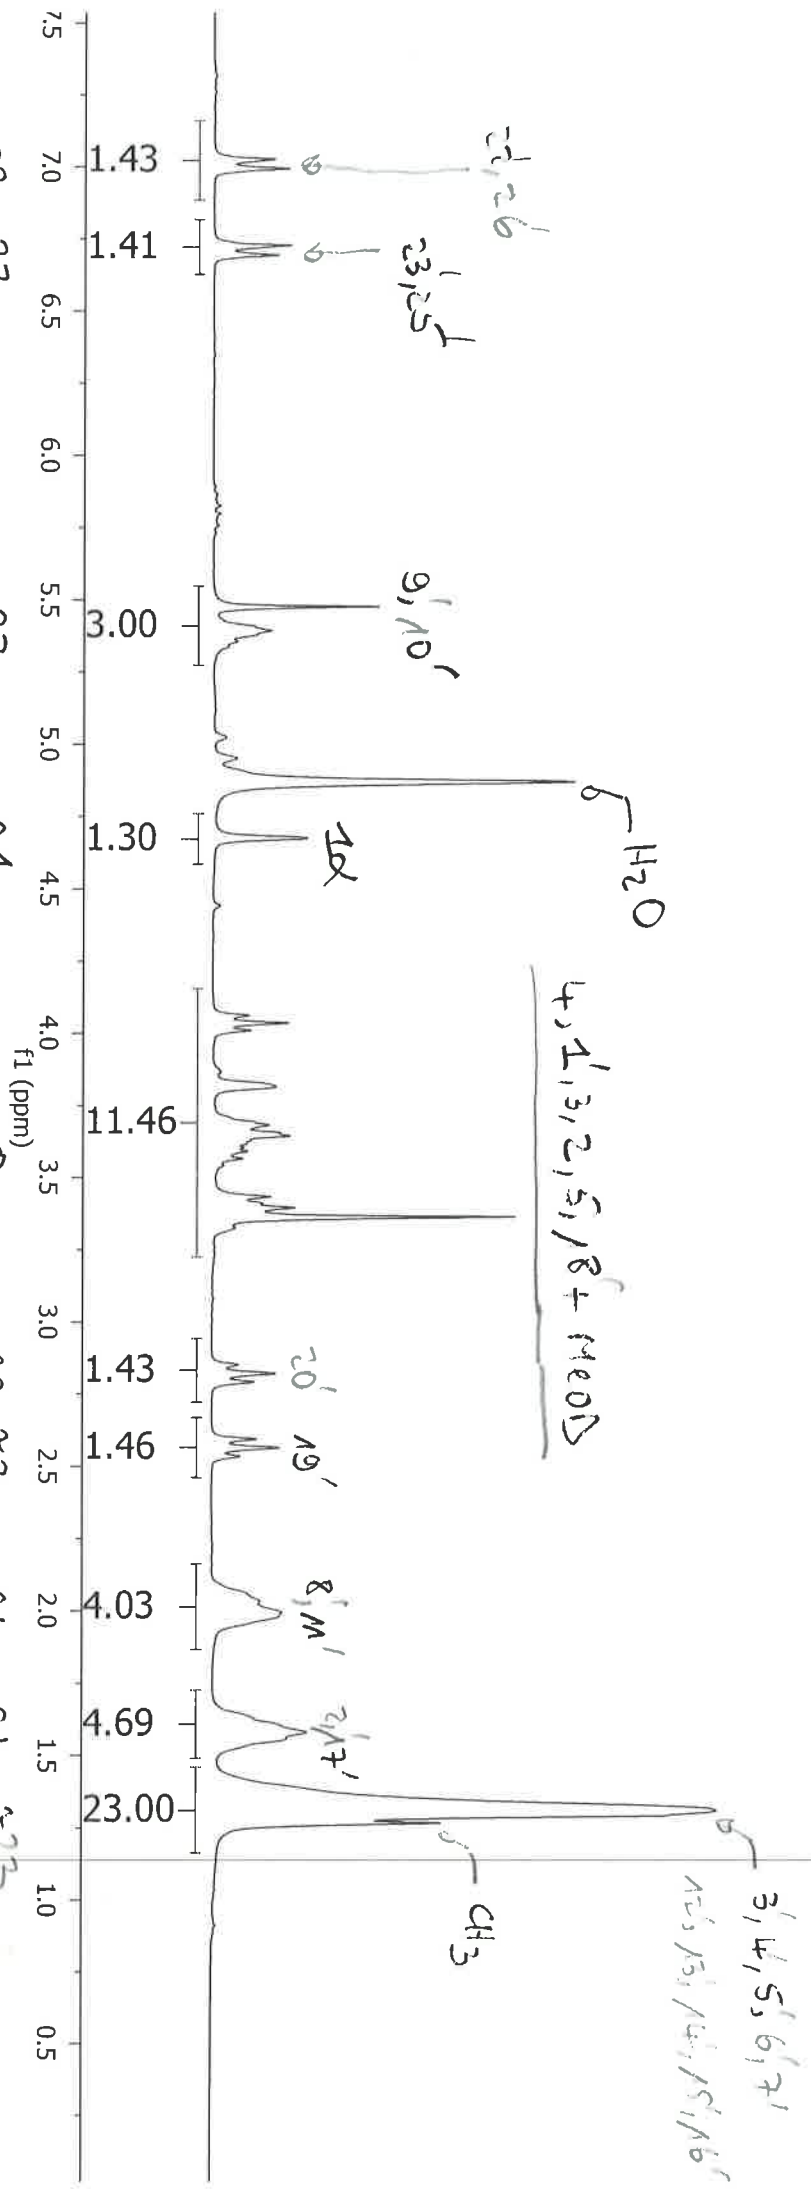



Analyse Administrator  
Date lundi 23 mars 2015 21:21

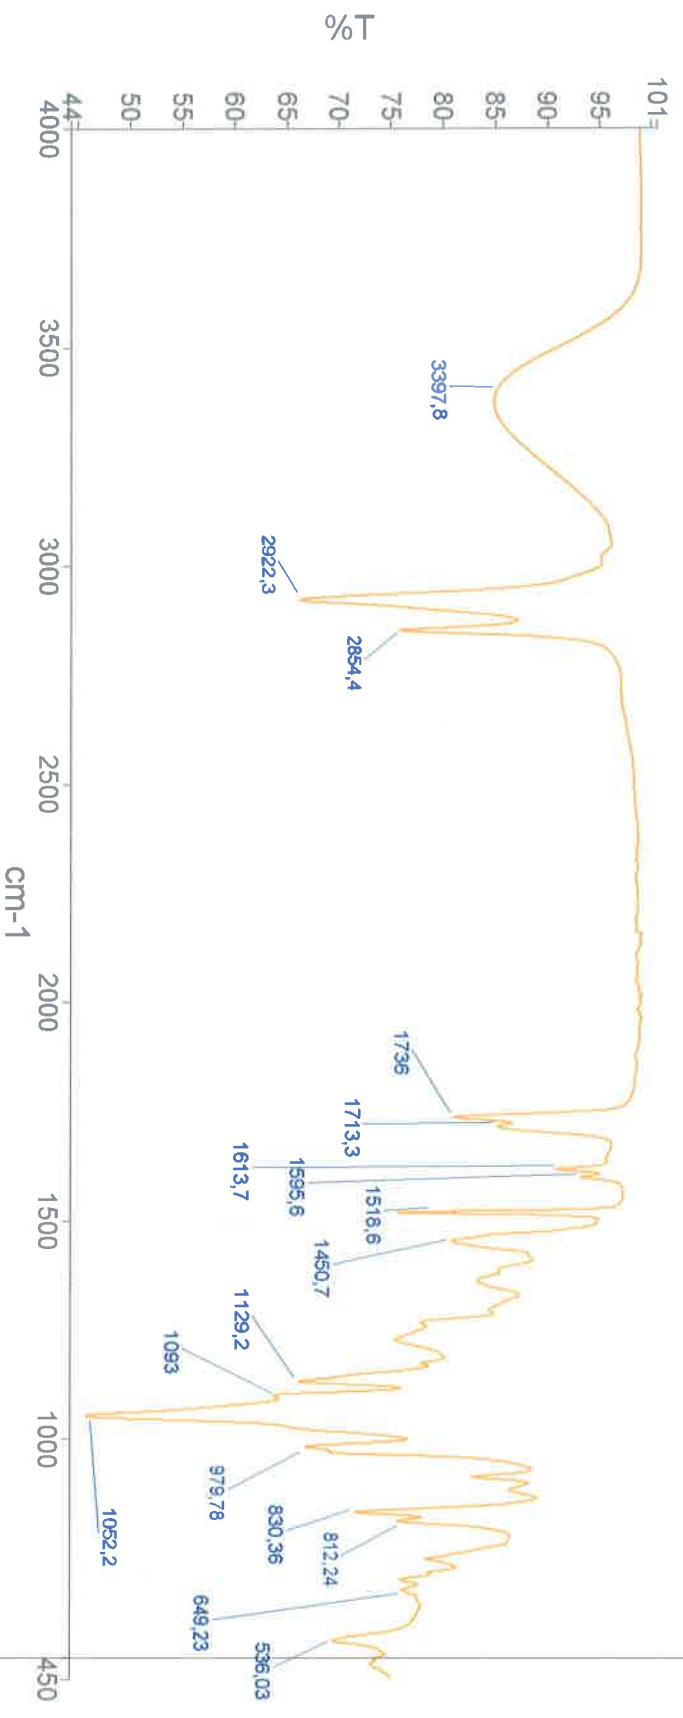

| Nom de l'échantillon | Description                                                | Trajet Optique (mm) |
|----------------------|------------------------------------------------------------|---------------------|
| RHC181EP             | Echantillon 005 Par Administrator Date lundi, mars 23 2015 | 1                   |

|      |      |      |      |      |      |      |      |      |      |      |      |      |      |      |      |      |      |      |      |      |      |      |      |      |      |      |
|------|------|------|------|------|------|------|------|------|------|------|------|------|------|------|------|------|------|------|------|------|------|------|------|------|------|------|
| 7.01 | 6.97 | 6.70 | 6.66 | 5.37 | 4.87 | 4.65 | 4.05 | 4.02 | 3.99 | 3.78 | 3.66 | 3.62 | 3.40 | 3.36 | 3.30 | 2.83 | 2.80 | 2.78 | 2.57 | 2.55 | 2.52 | 1.98 | 1.57 | 1.29 | 1.26 | 1.24 |
|------|------|------|------|------|------|------|------|------|------|------|------|------|------|------|------|------|------|------|------|------|------|------|------|------|------|------|

FOA054 formation du RH-C20i-EP... soluble dans le MeOD

**RH-C20i-EP**

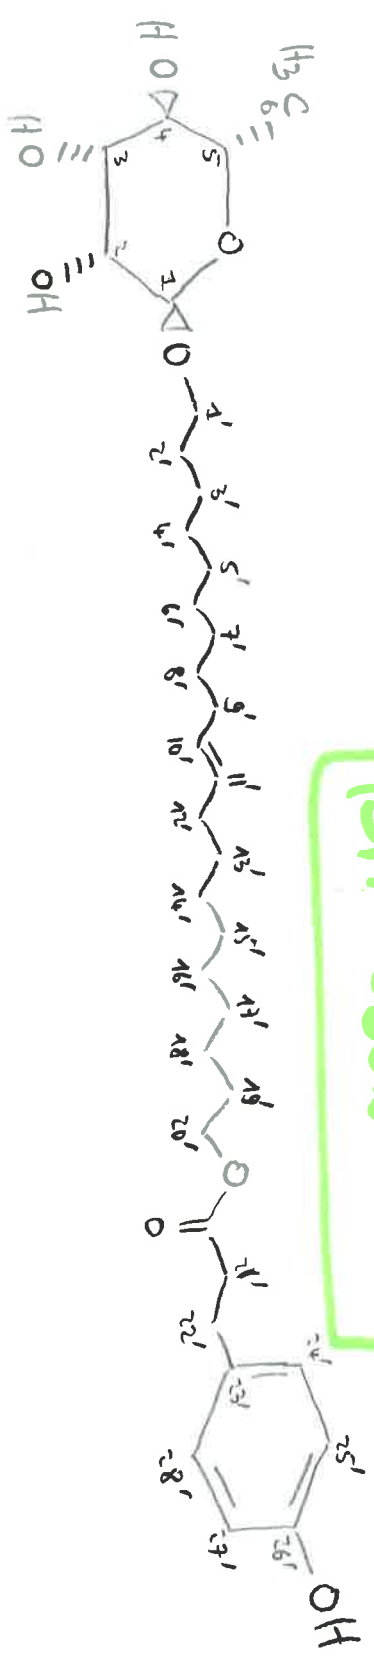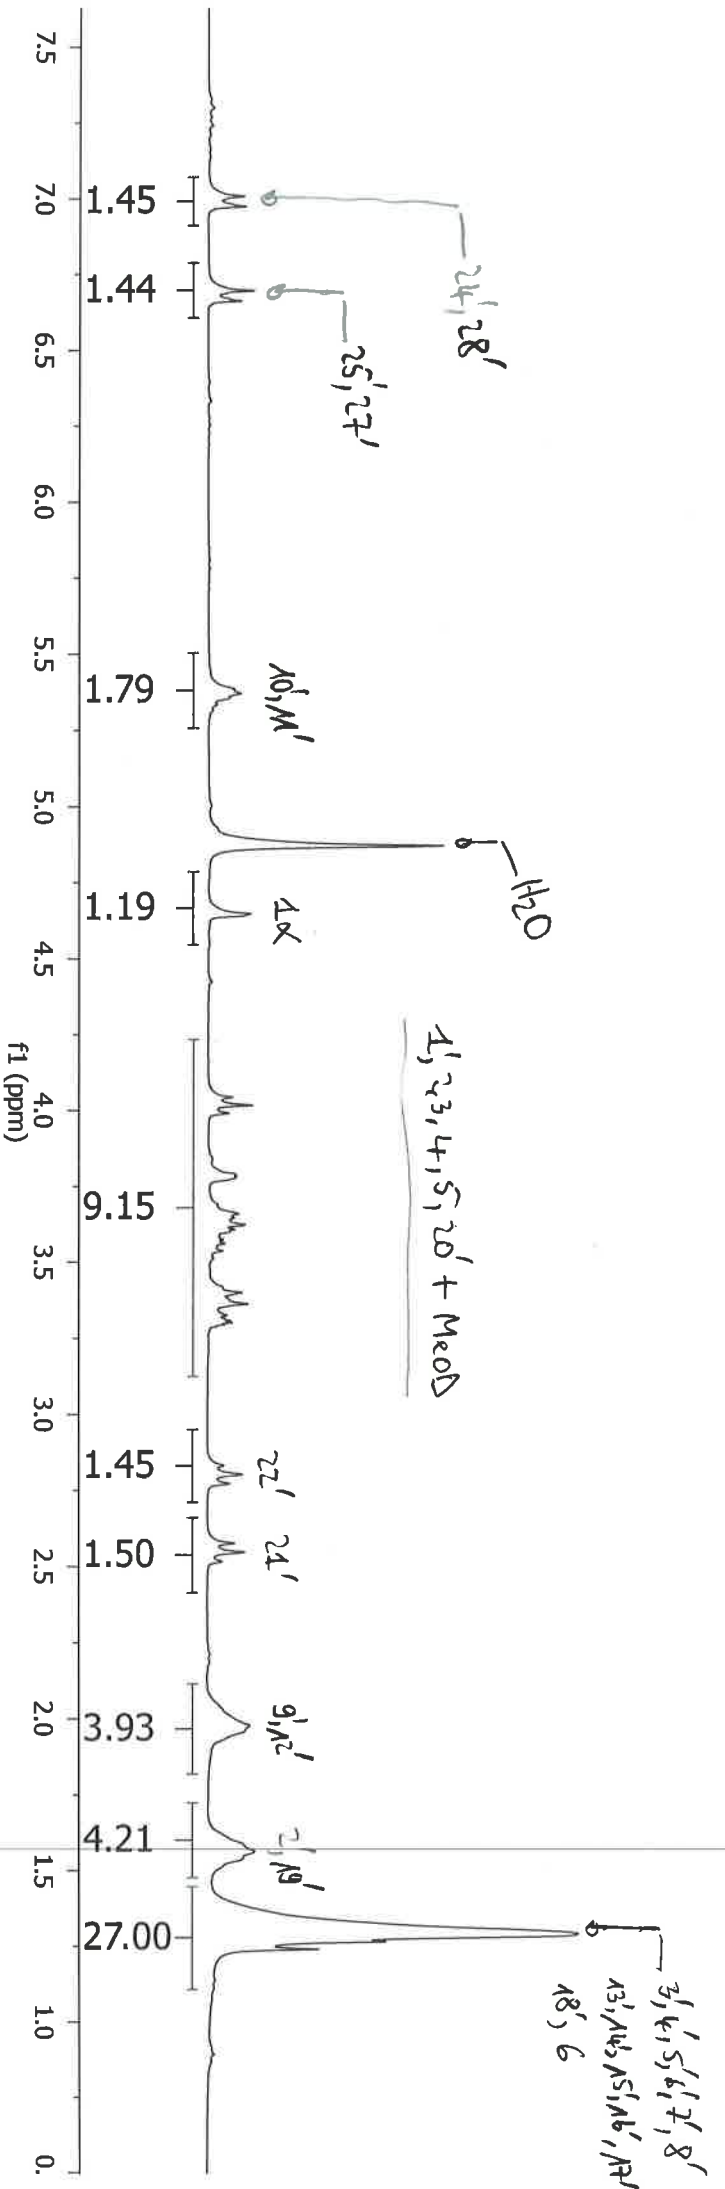



FOA054 formation du RH-C20i-RH... soluble MeOD

RH-C20i-EP

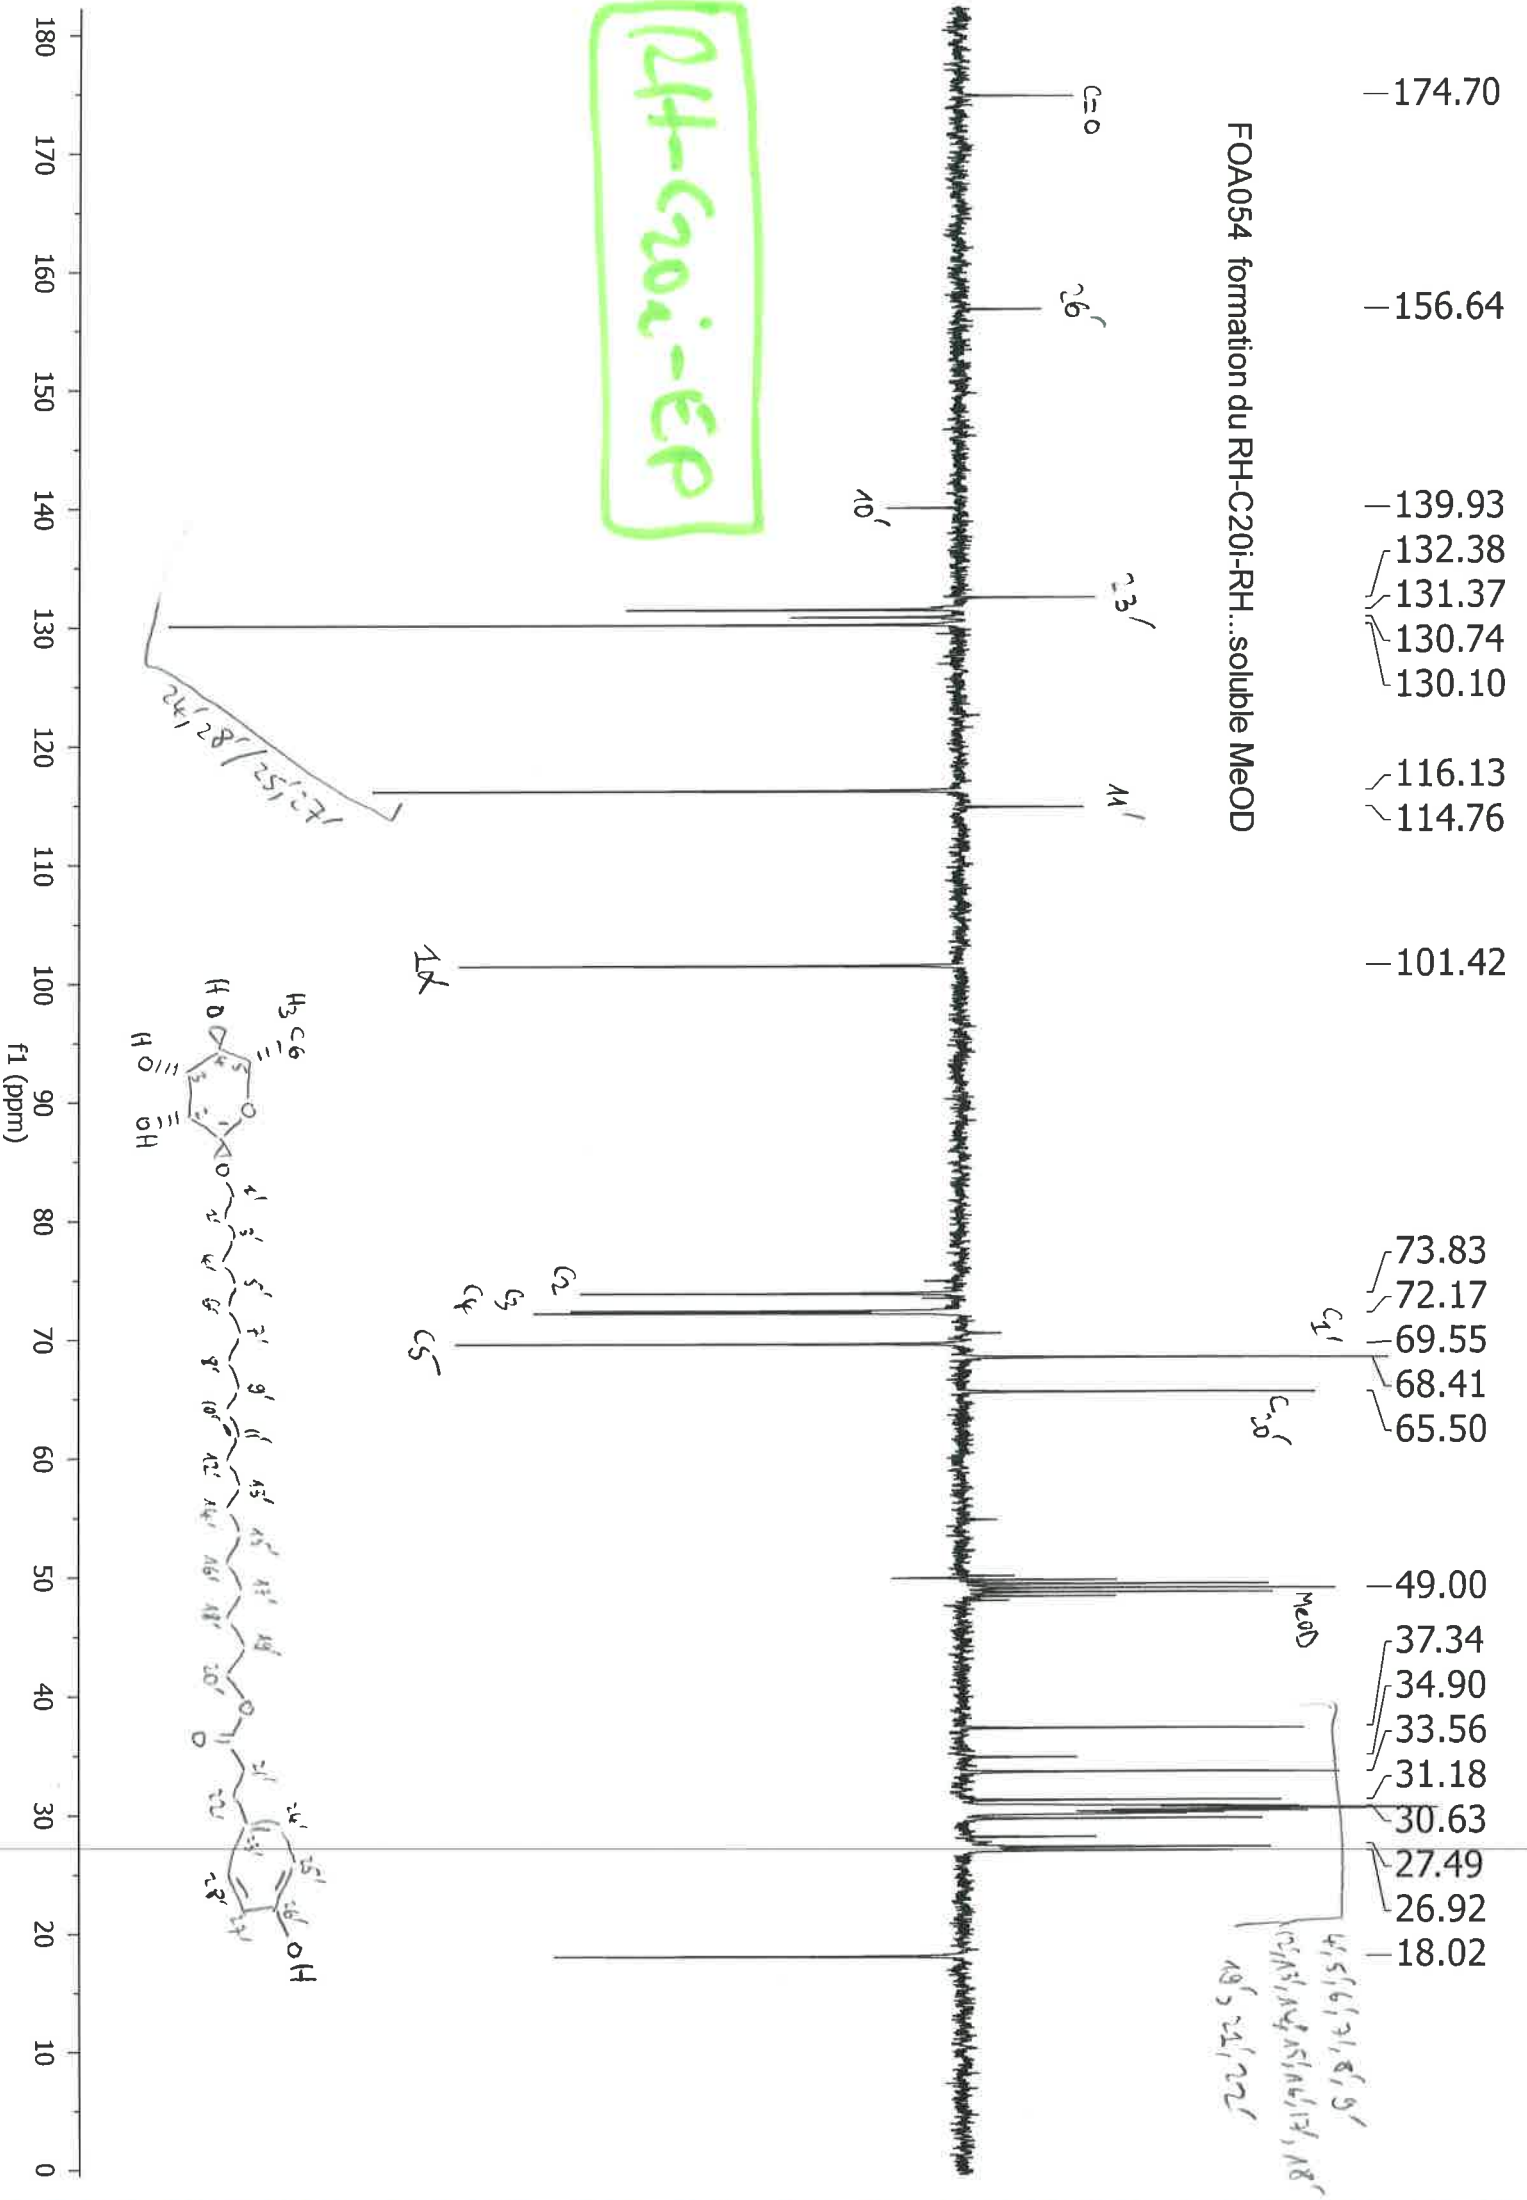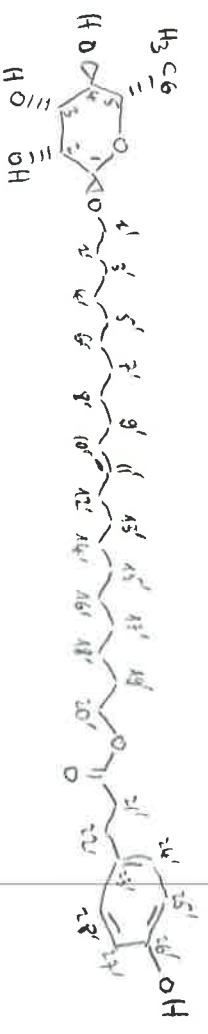



Analyste  
Date  
Administrateur  
lundi 23 mars 2015 21:28

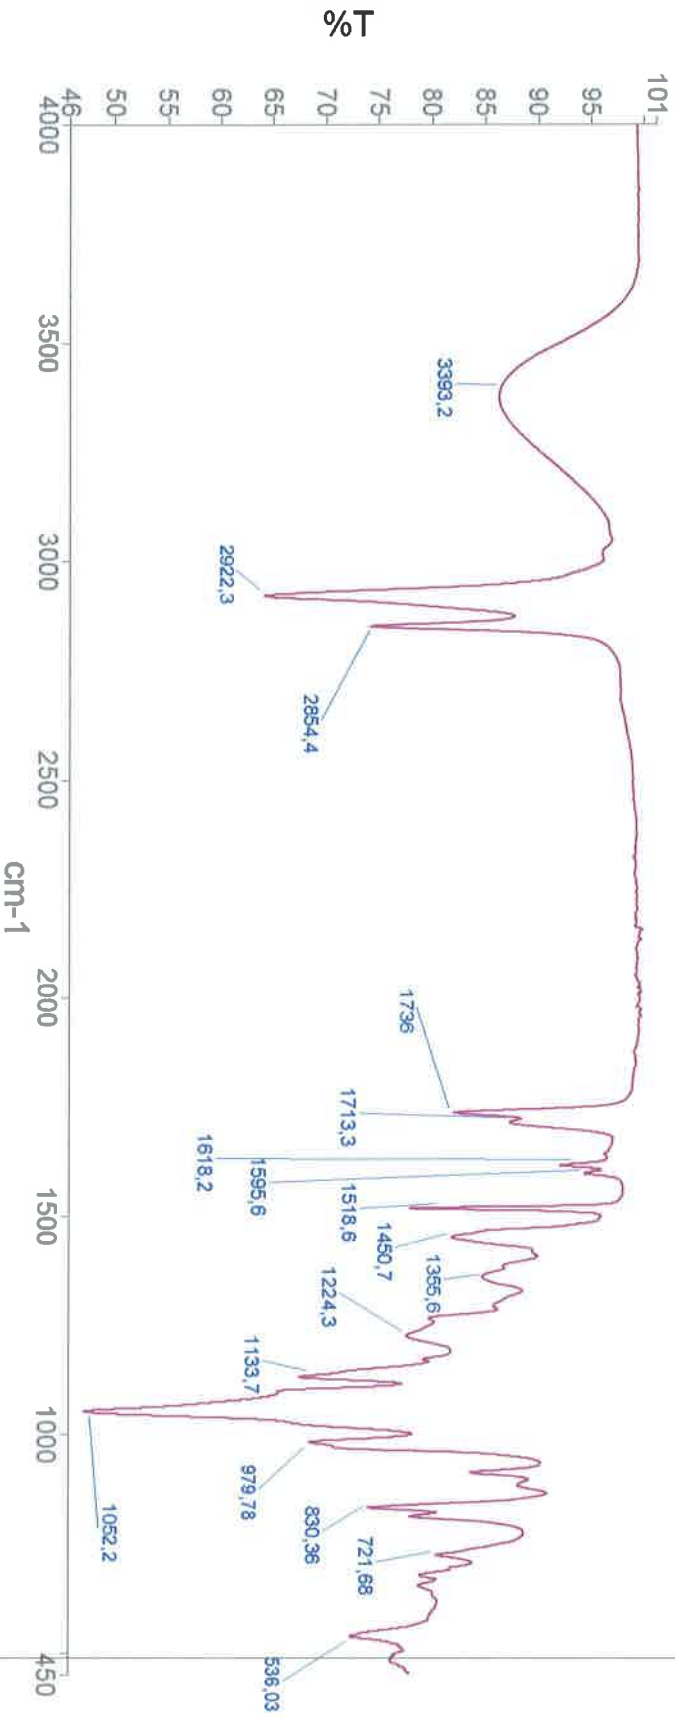

| Nom de l'échantillon | Description                                                 | Trajet Optique (mm) |
|----------------------|-------------------------------------------------------------|---------------------|
| RHC201EP             | Echantillon 006 Par Administrateur Date lundi, mars 23 2015 | 1                   |
