# Supplementary material for: Efficient syntheses of bolaform surfactants froml-rhamnose and/or 3-(4-hydroxyphenyl)propionic acid
Source: Royal Society of Chemistry journal article supplement (doi:10.1039/c5gc00448a), 2015-01-01
Supplement: c5gc00448a12.pdf [file c5gc00448a12.pdf]

FOA044 Produit brun clair obtenu après passage sur colonne chromatographique.. il s'agit de la deuxième tâche  
 .....RH-C8i.....il est soluble dans le MeOD .....RMN 1H

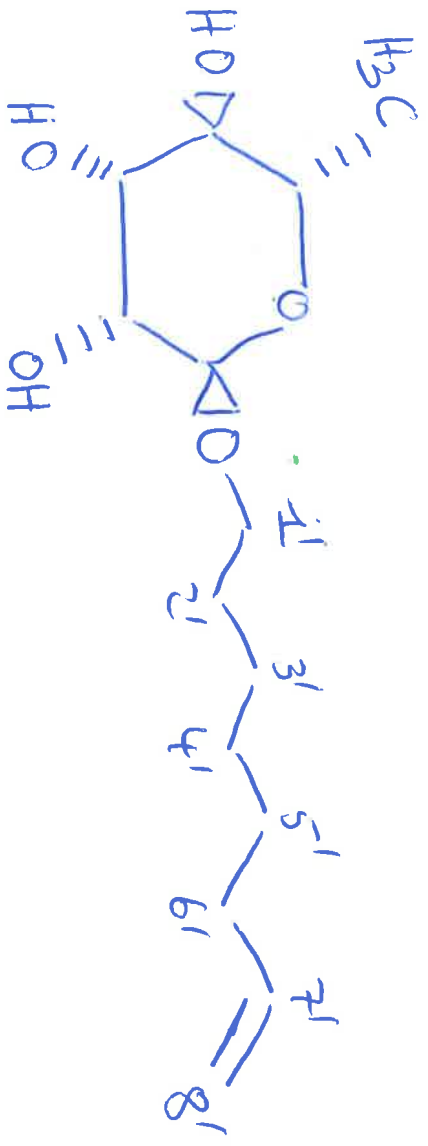

**RH-C8i**

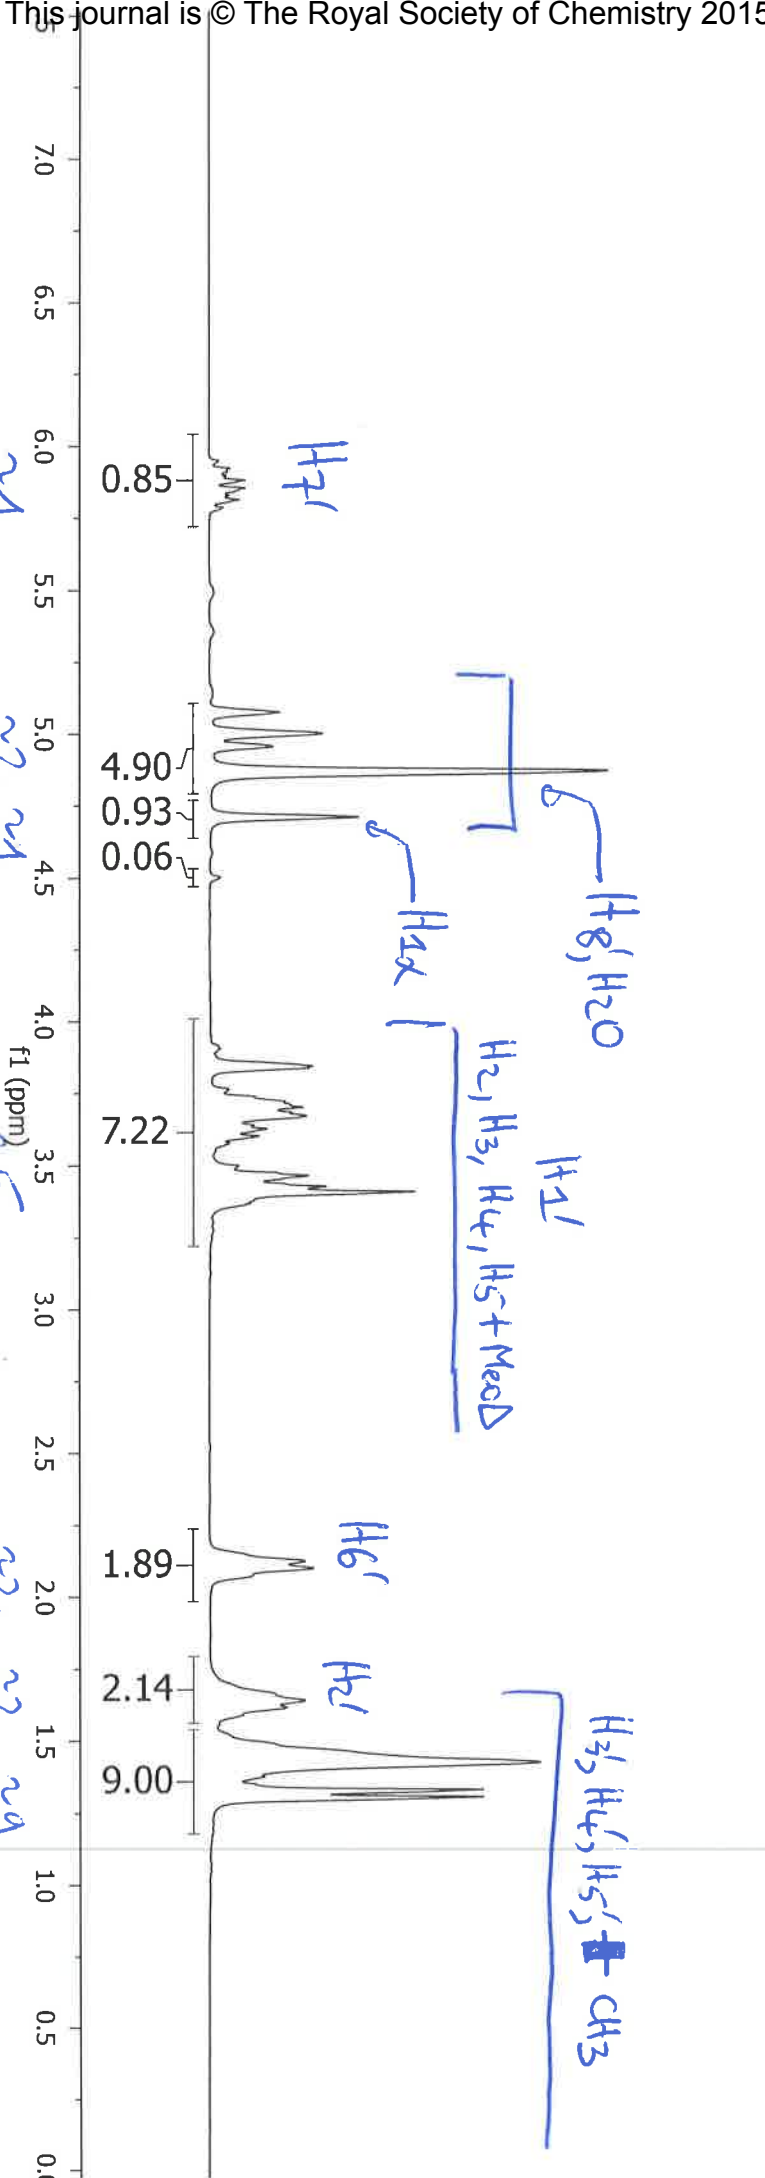

FOA044....Produit brun clair obtenu après passage sur colonne chromatographique...il s'agit de la deuxième tâche...il est soluble dans le MeOD  
 ...RMN 13C RH-C8i

**RH-C8i**

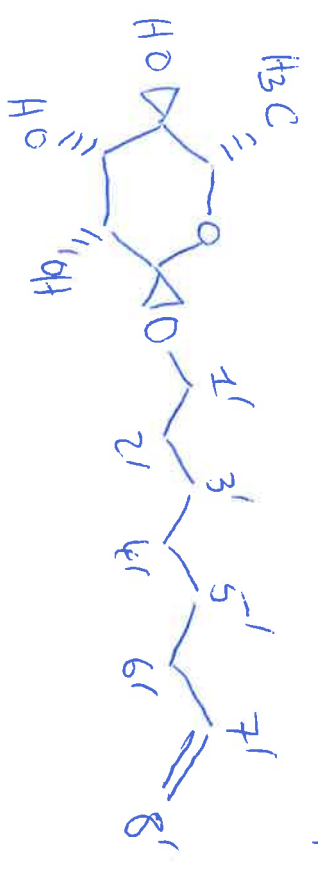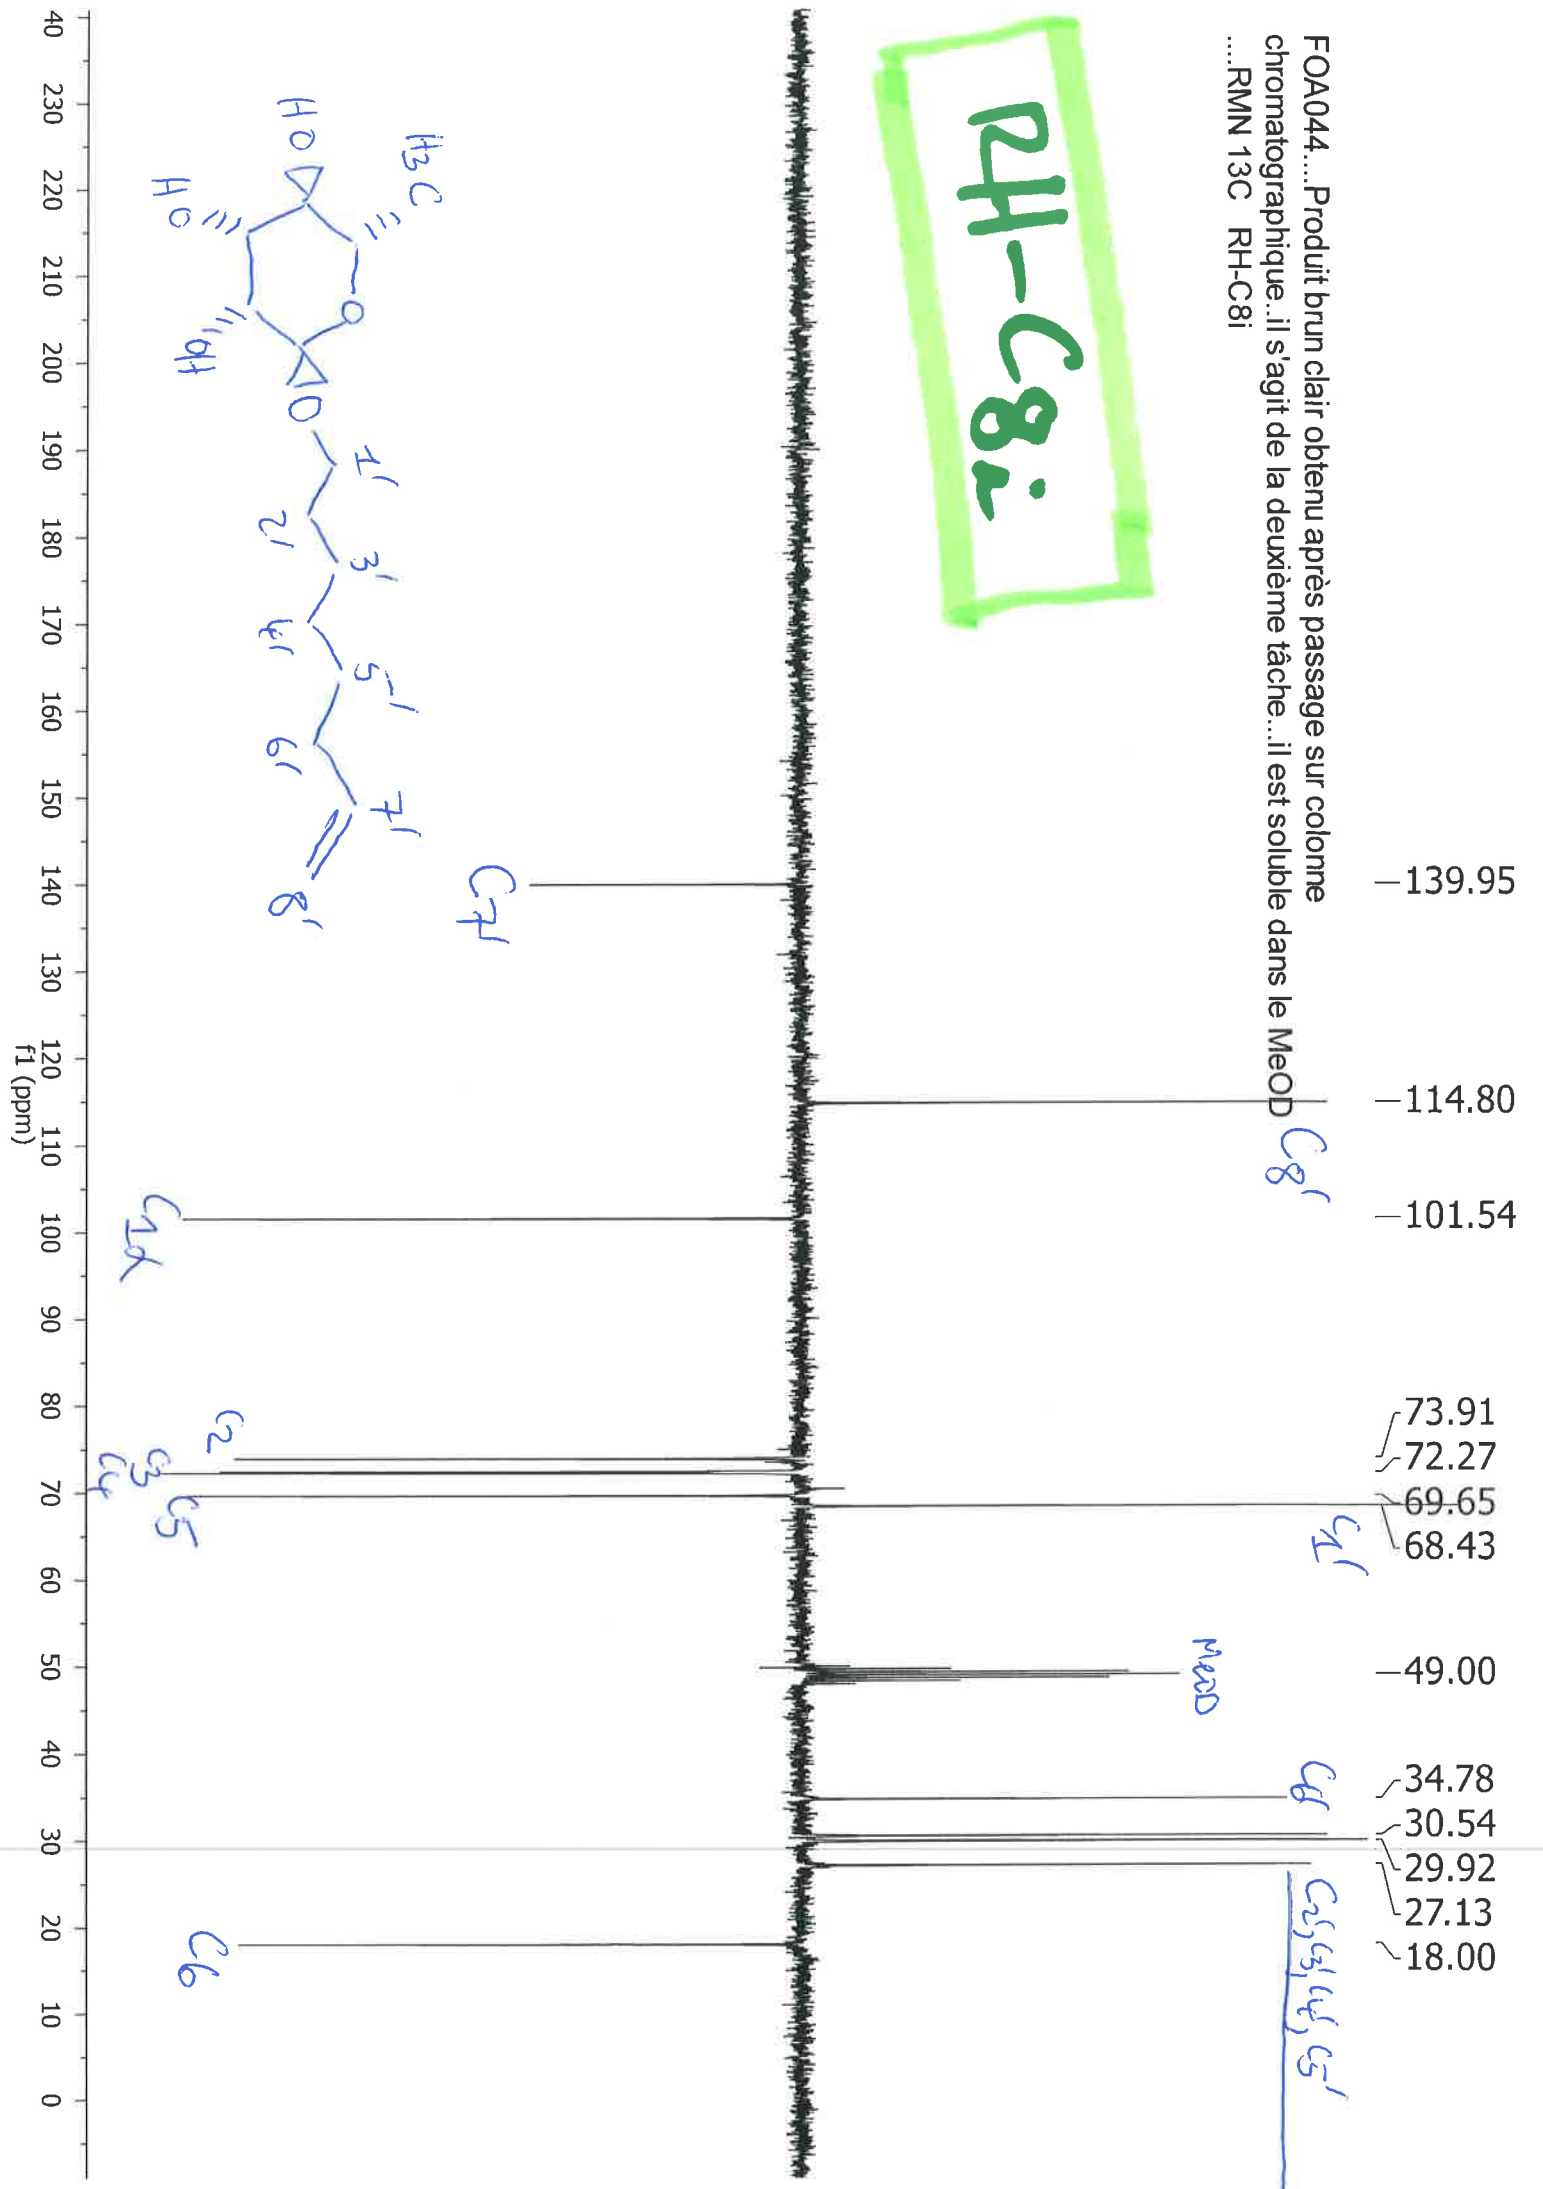

Analyse Administrator  
Date lundi 23 mars 2015 20:59

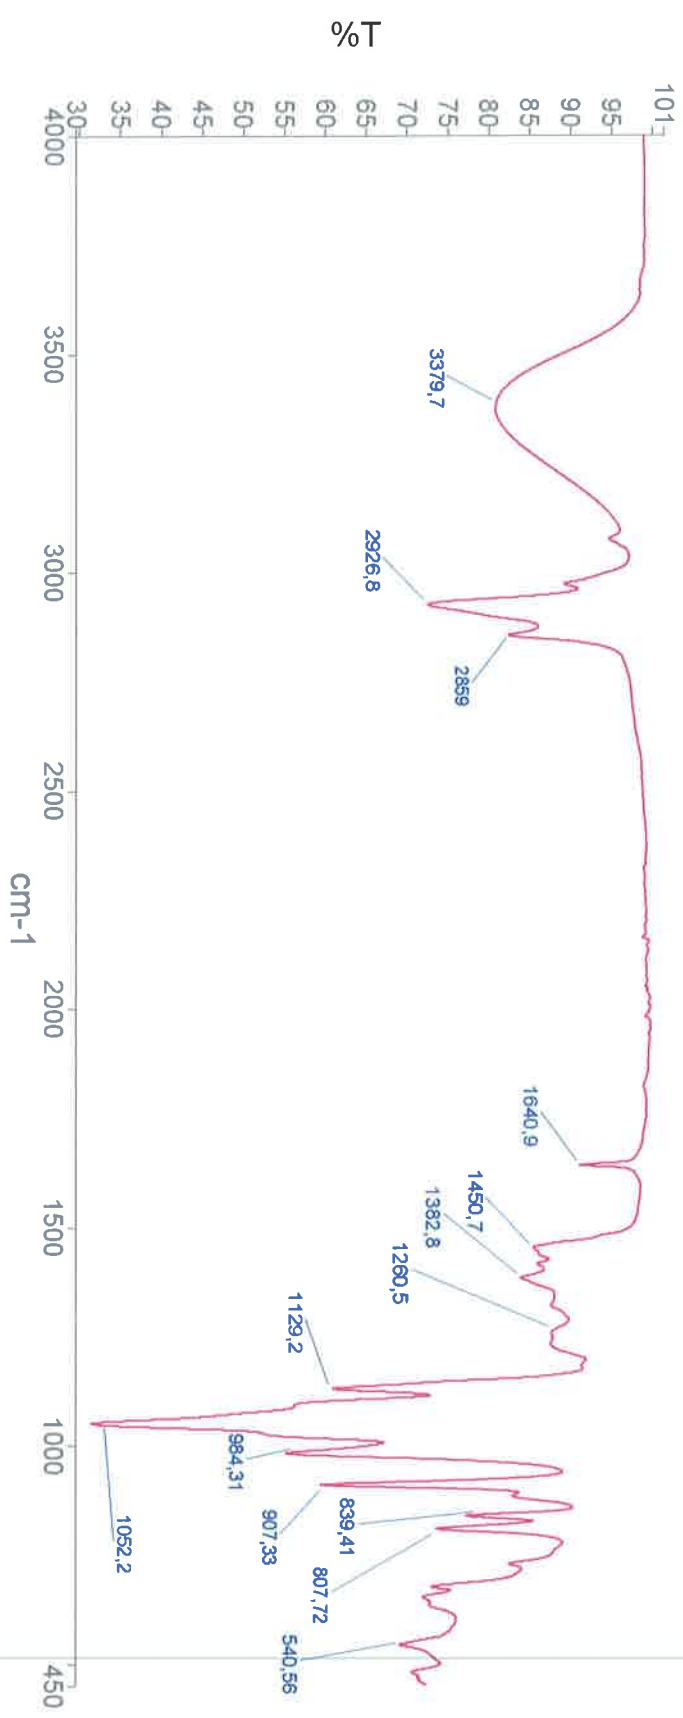

| Nom de l'échantillon | Description                                                | Trajet Optique (mm) |
|----------------------|------------------------------------------------------------|---------------------|
| RHC8i                | Echantillon 003 Par Administrator Date lundi, mars 23 2015 | 1                   |
