# Supplementary material for: Efficient syntheses of bolaform surfactants froml-rhamnose and/or 3-(4-hydroxyphenyl)propionic acid
Source: Royal Society of Chemistry journal article supplement (doi:10.1039/c5gc00448a), 2015-01-01
Supplement: c5gc00448a13.pdf [file c5gc00448a13.pdf]

FOA036 Produit brun obtenu après passage sur colonne chromatographique... il s'agit de la deuxième tâche  
 ..... RH-C9i..... il est soluble dans le MeOD..... RMN 1H

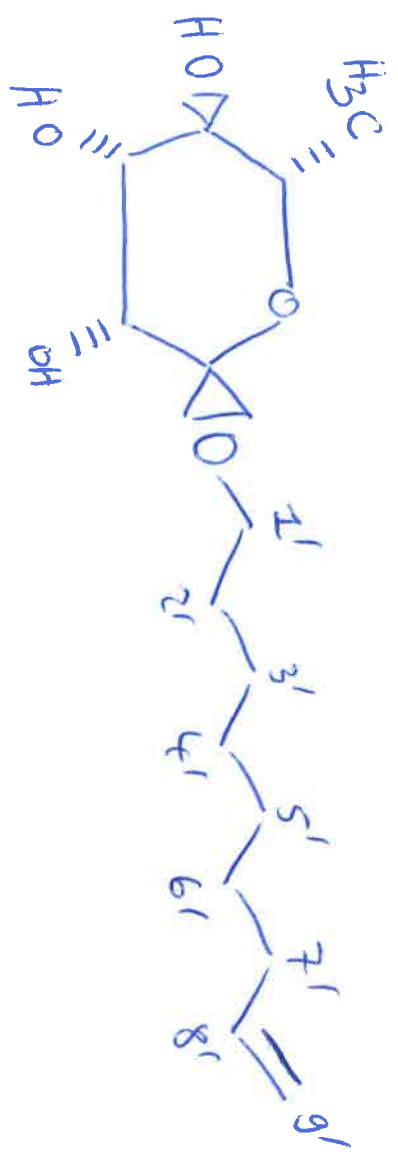

**RH-C9i**

- 5.89
- 5.72
- 5.01
- 4.94
- 4.65
- 4.44
- 3.84
- 3.79
- 3.40
- 3.37
- 3.35
- 3.31
- 2.06
- 2.04
- 2.01
- 1.58
- 1.34
- 1.27
- 1.24

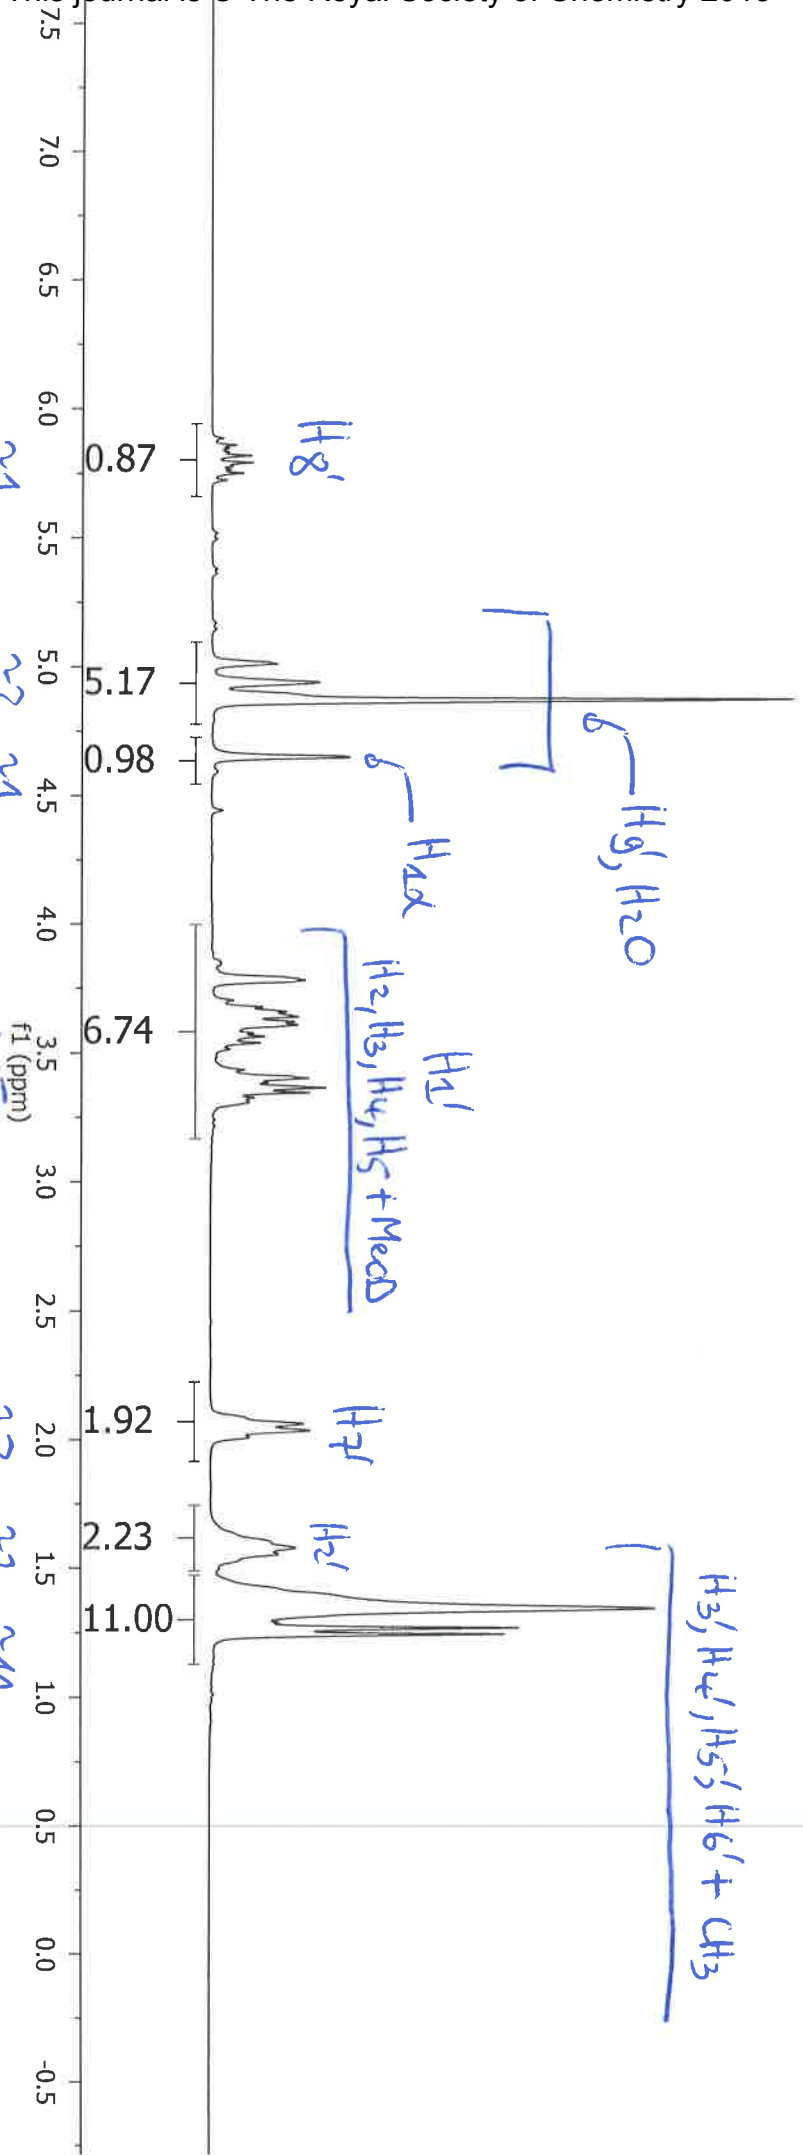

FOA036 Produit brun obtenu après passage sur colonne chromatographique... il s'agit de la deuxième tâche... RH-C9i il est soluble dans le MeOD .... RMN 13C

**RH-C9i**

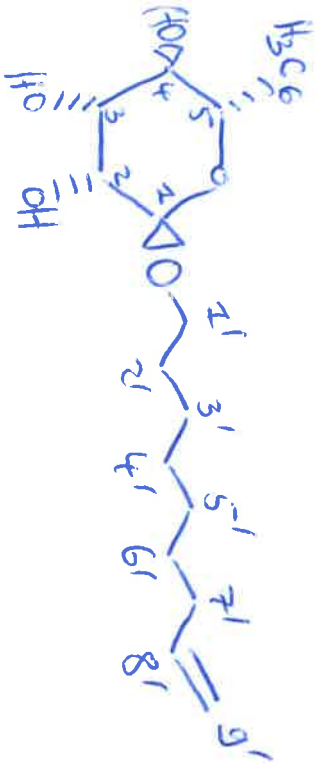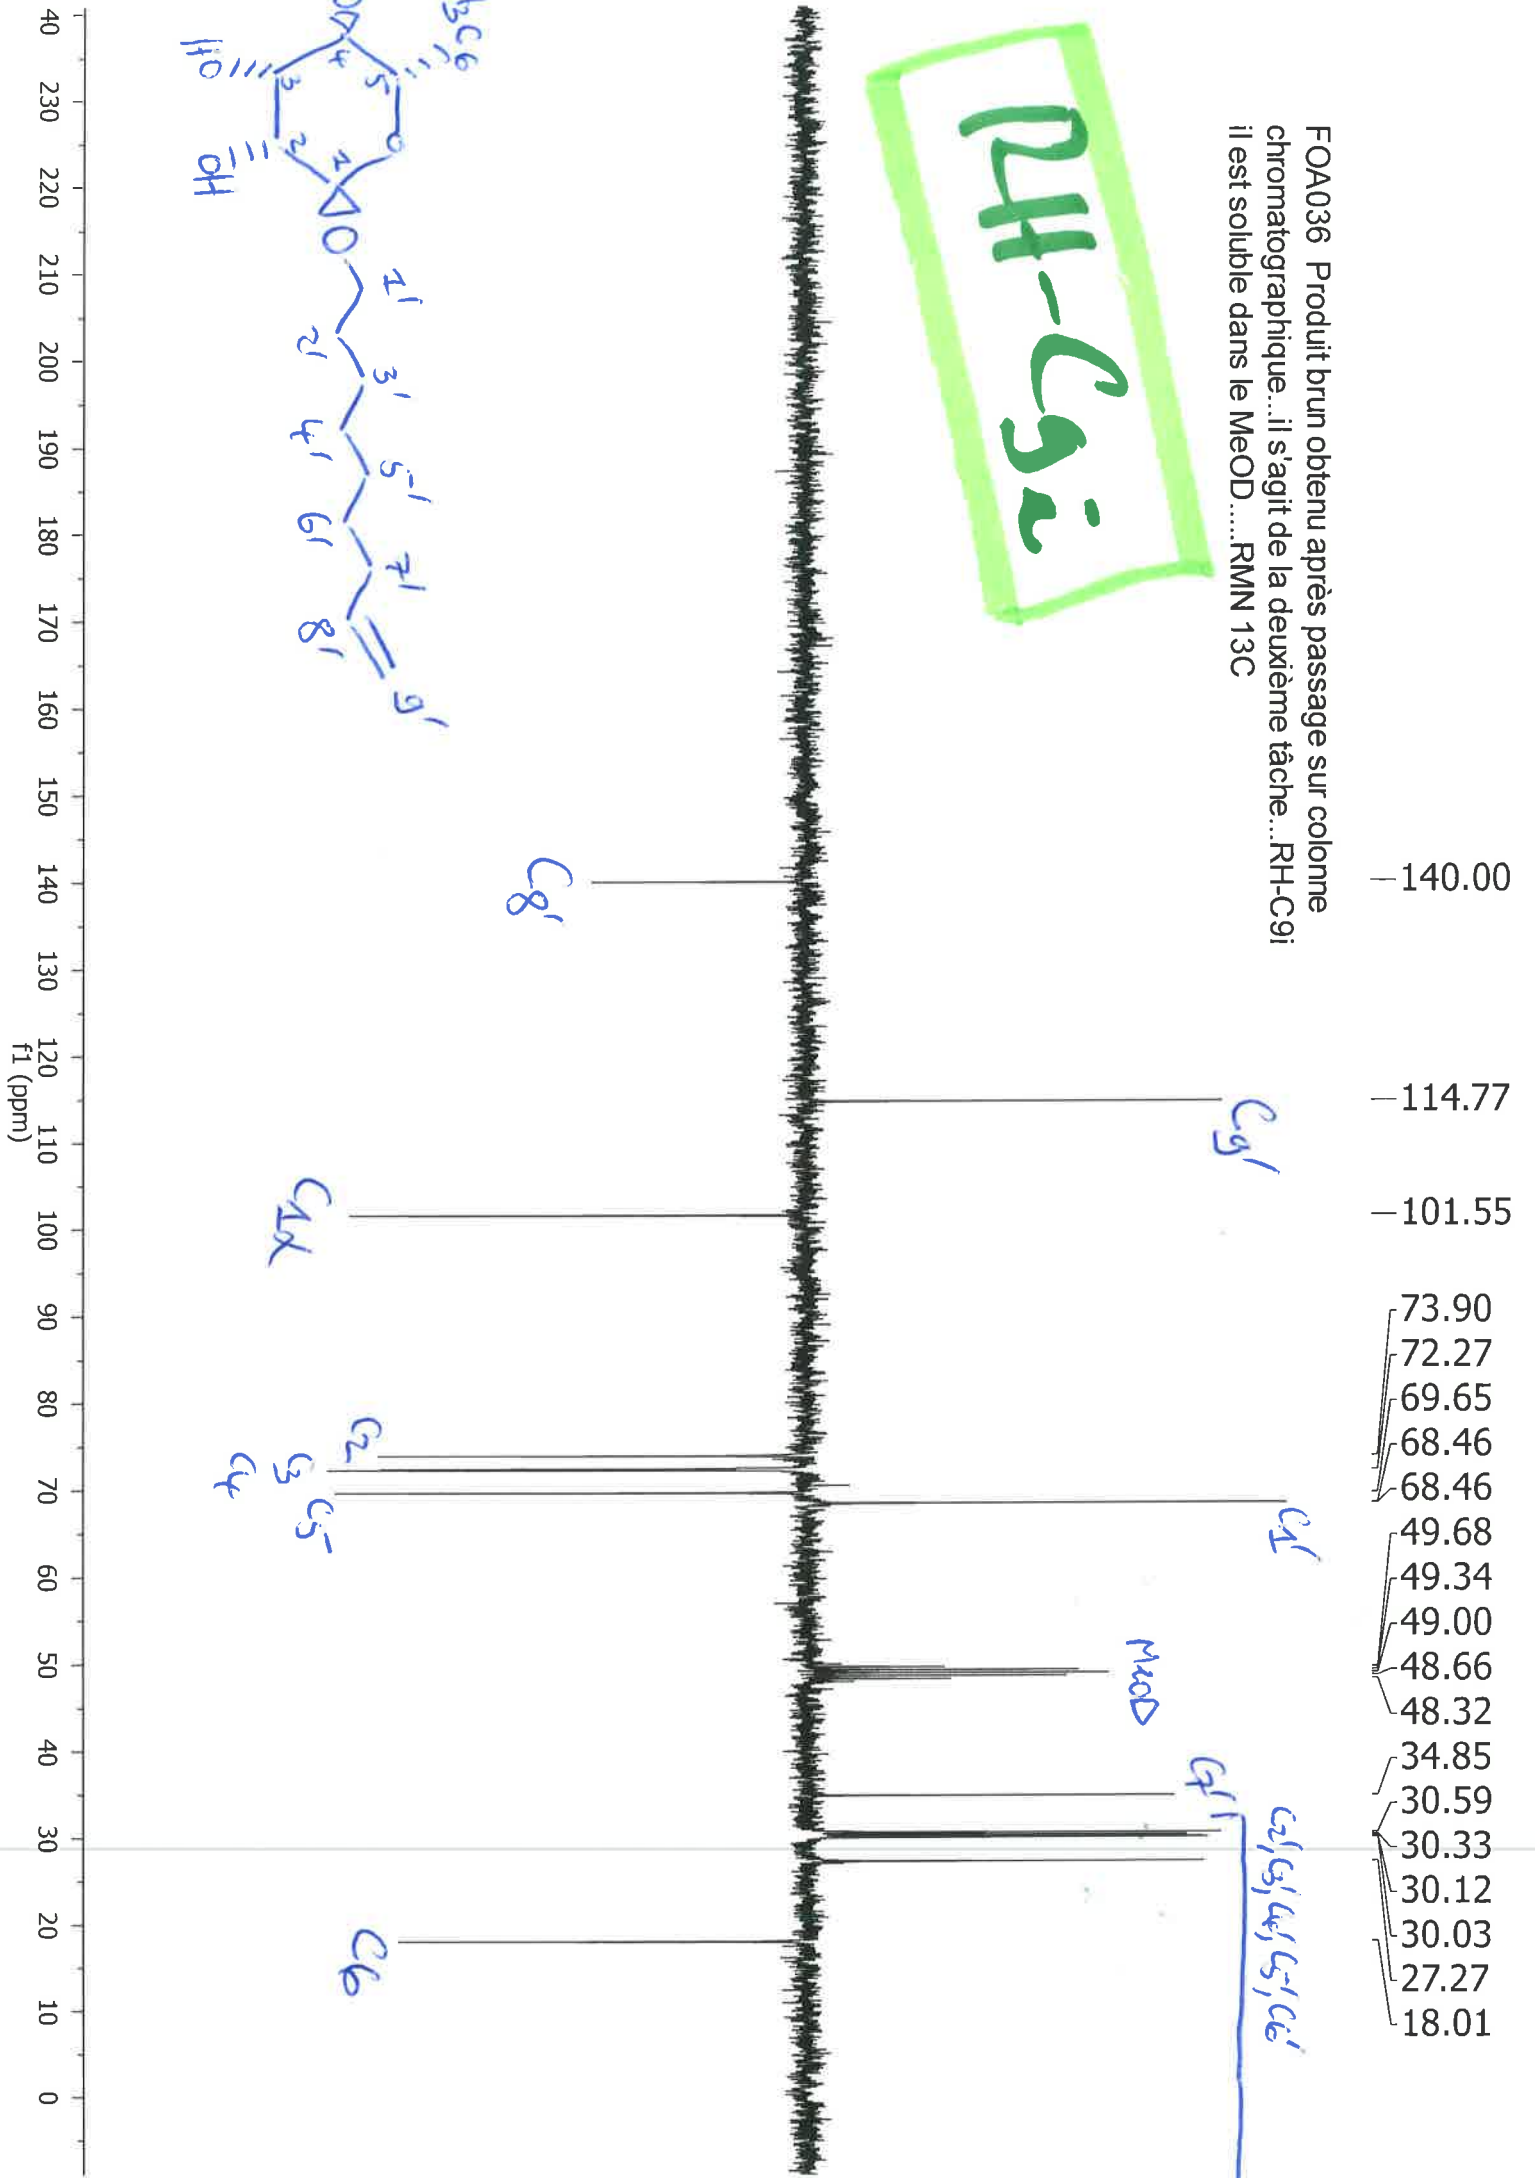

Analyse Administrator  
Date lundi 23 mars 2015 21:08

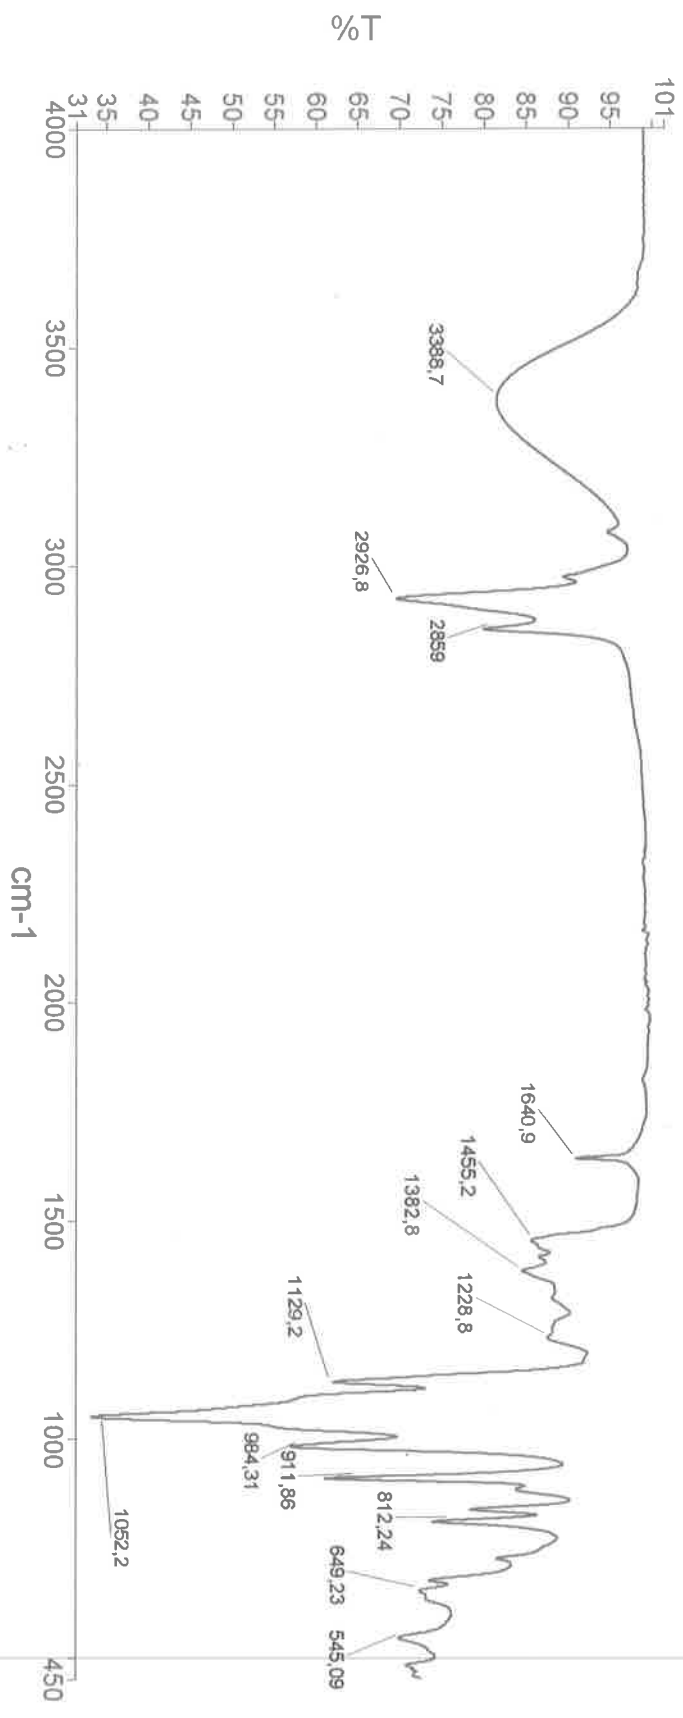

| Nom de l'échantillon | Description                                                | Trajet Optique (mm) |
|----------------------|------------------------------------------------------------|---------------------|
| RHC91                | Echantillon 004 Par Administrator Date lundi, mars 23 2015 | 1                   |
