# Supplementary material for: Efficient syntheses of bolaform surfactants froml-rhamnose and/or 3-(4-hydroxyphenyl)propionic acid
Source: Royal Society of Chemistry journal article supplement (doi:10.1039/c5gc00448a), 2015-01-01
Supplement: c5gc00448a14.pdf [file c5gc00448a14.pdf]

FOA045 Produit brun visqueux  
 bcp plus sombre..RH-C10i  
 RMN 13C...soluble dans le MeOD

**RH-C10i**

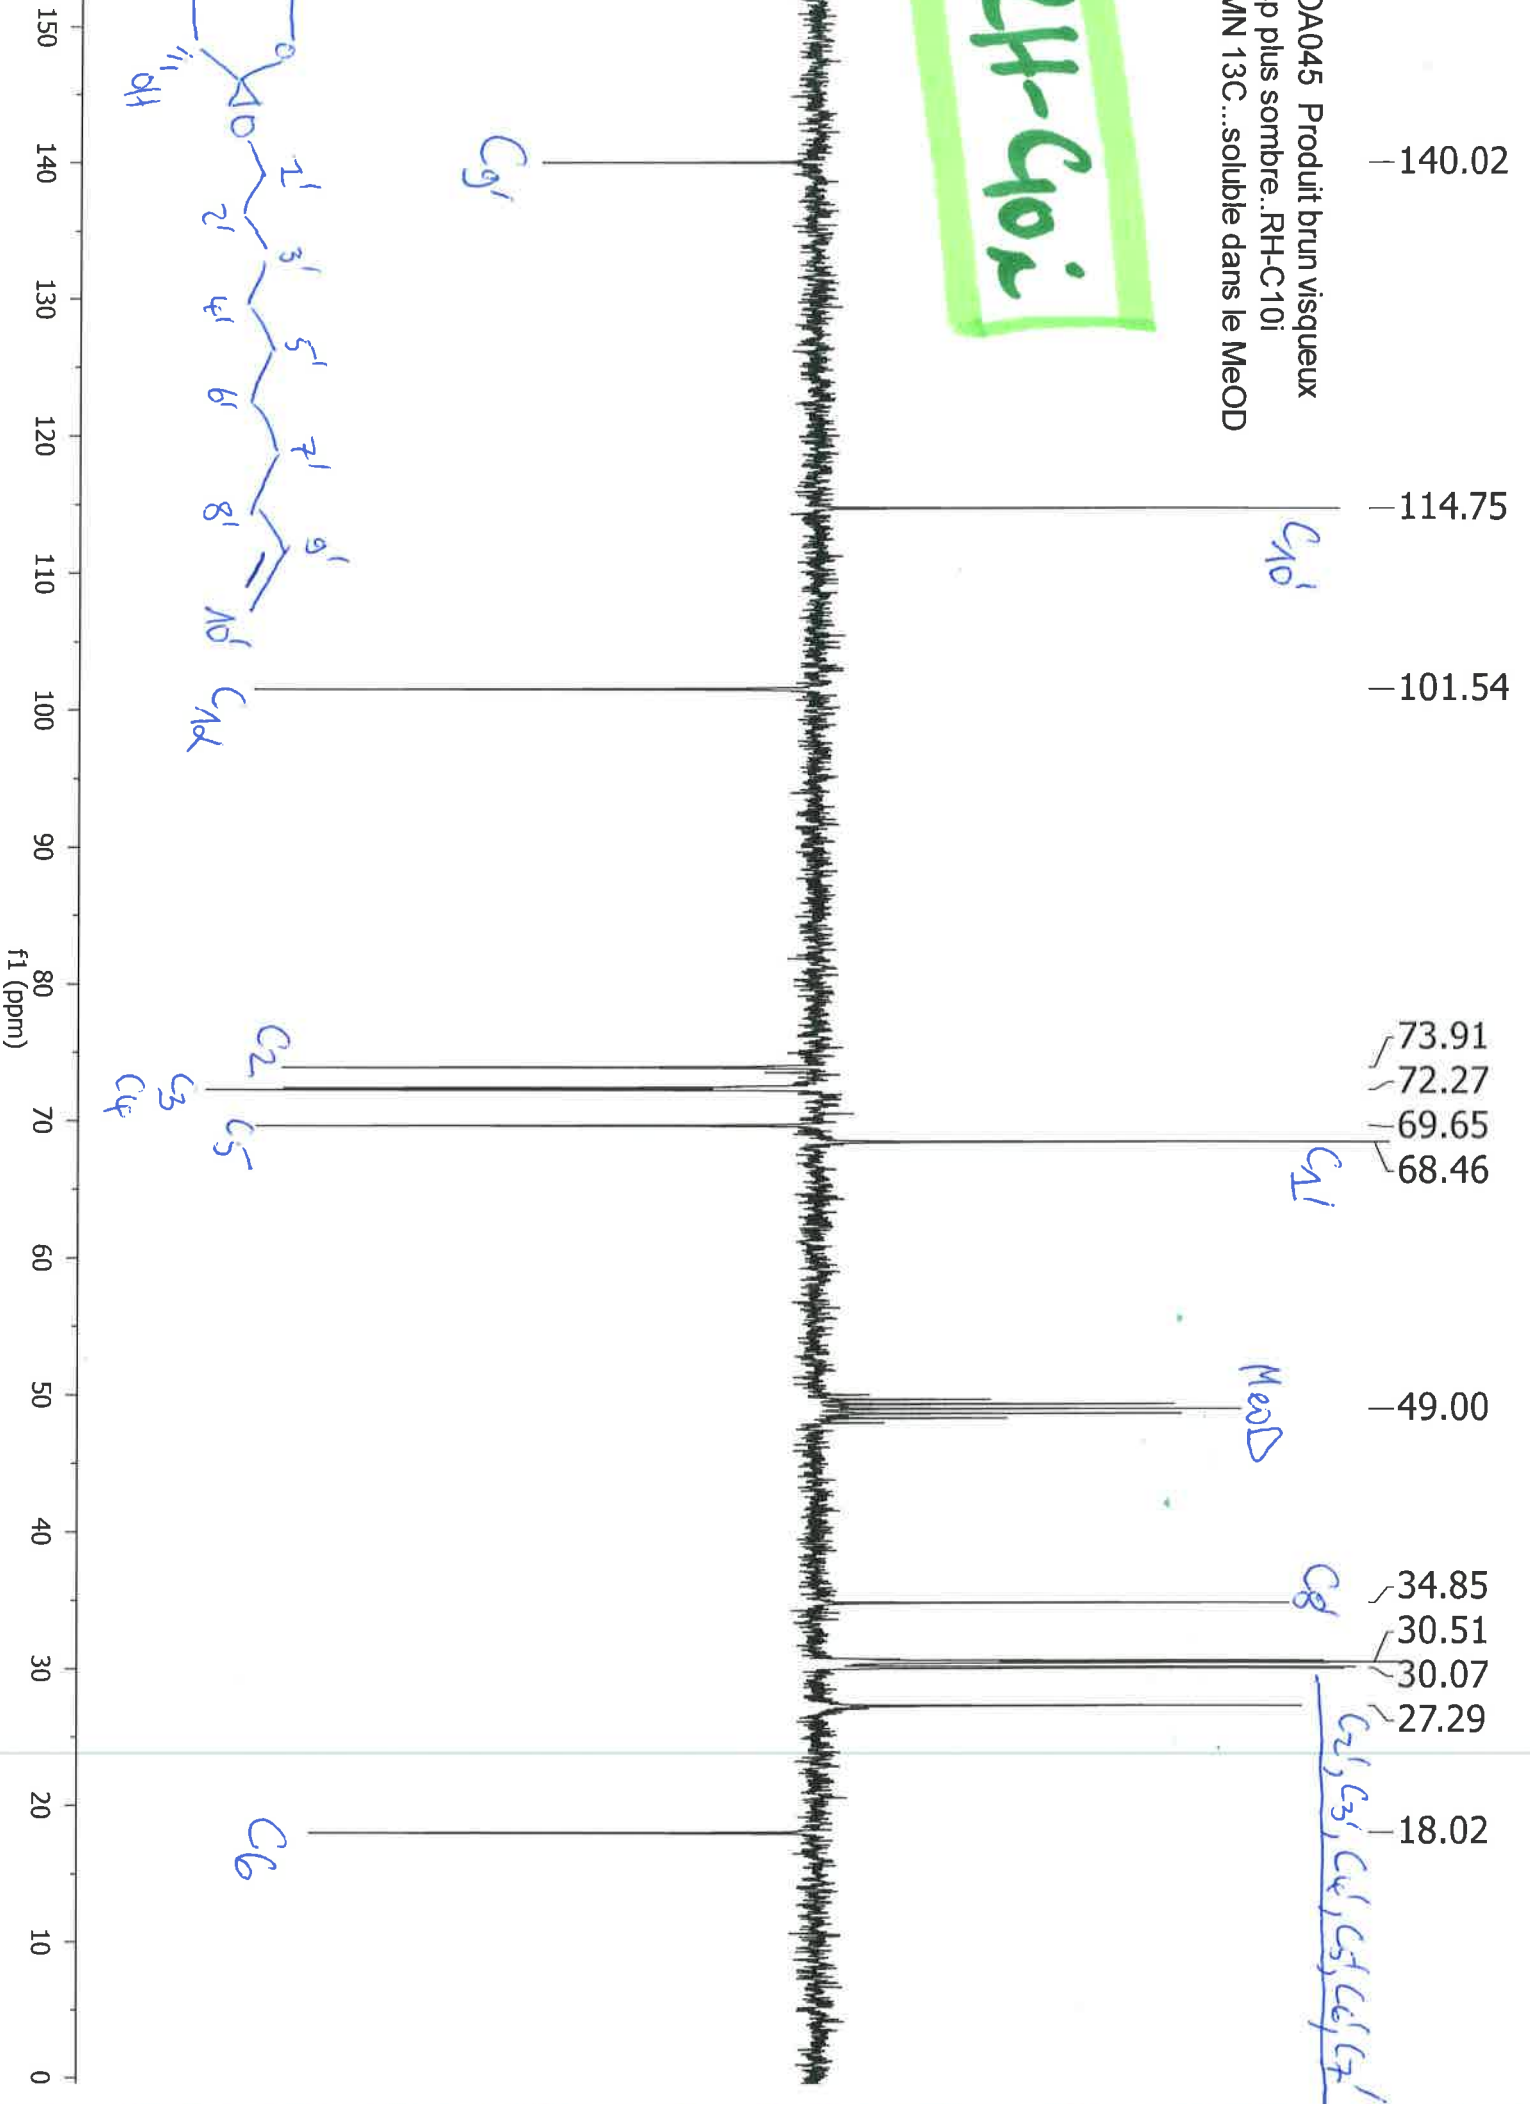

Analyse Administrator  
Date lundi 23 mars 2015 20:45

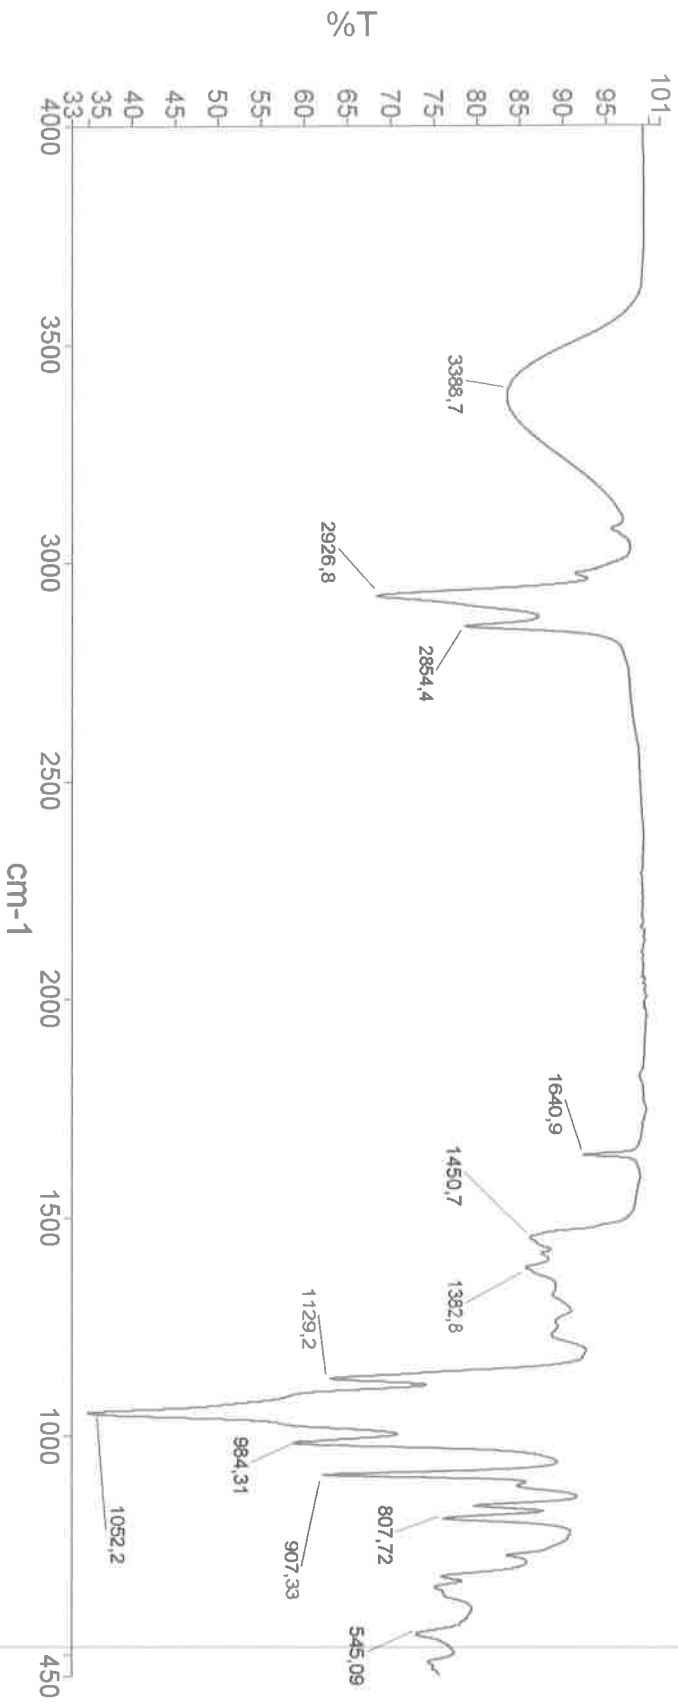

| Nom de l'échantillon | Description                                                      | Trajet Optique (mm) |
|----------------------|------------------------------------------------------------------|---------------------|
| RHC10i               | Echantillon 018 Par Administrator Date vendredi, février 27 2015 | 1                   |
