# Supplementary material for: Efficient syntheses of bolaform surfactants froml-rhamnose and/or 3-(4-hydroxyphenyl)propionic acid
Source: Royal Society of Chemistry journal article supplement (doi:10.1039/c5gc00448a), 2015-01-01
Supplement: c5gc00448a15.pdf [file c5gc00448a15.pdf]

FOA039 Produit brun visqueux obtenu après purification sur colonne...RH-C11i...il s'agit de la deuxième tâche  
 il est soluble dans le MeOH

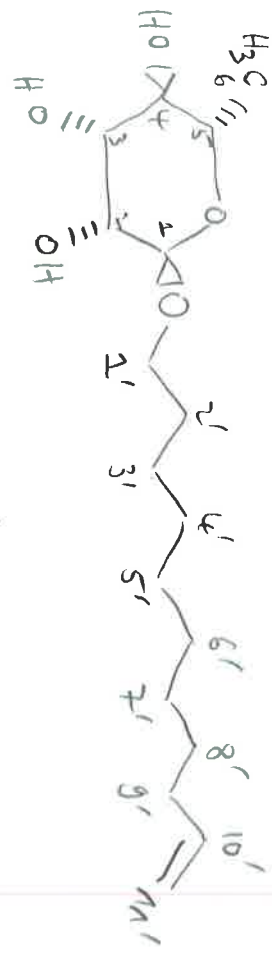

**RH-C11i**

- 5.91
- 5.74
- 5.03
- 4.95
- 4.91
- 4.87
- 4.67
- 4.46
- 3.87
- 3.80
- 3.42
- 3.39
- 3.33
- 2.08
- 2.05
- 2.02
- 1.62
- 1.60
- 1.57
- 1.34
- 1.29
- 1.27

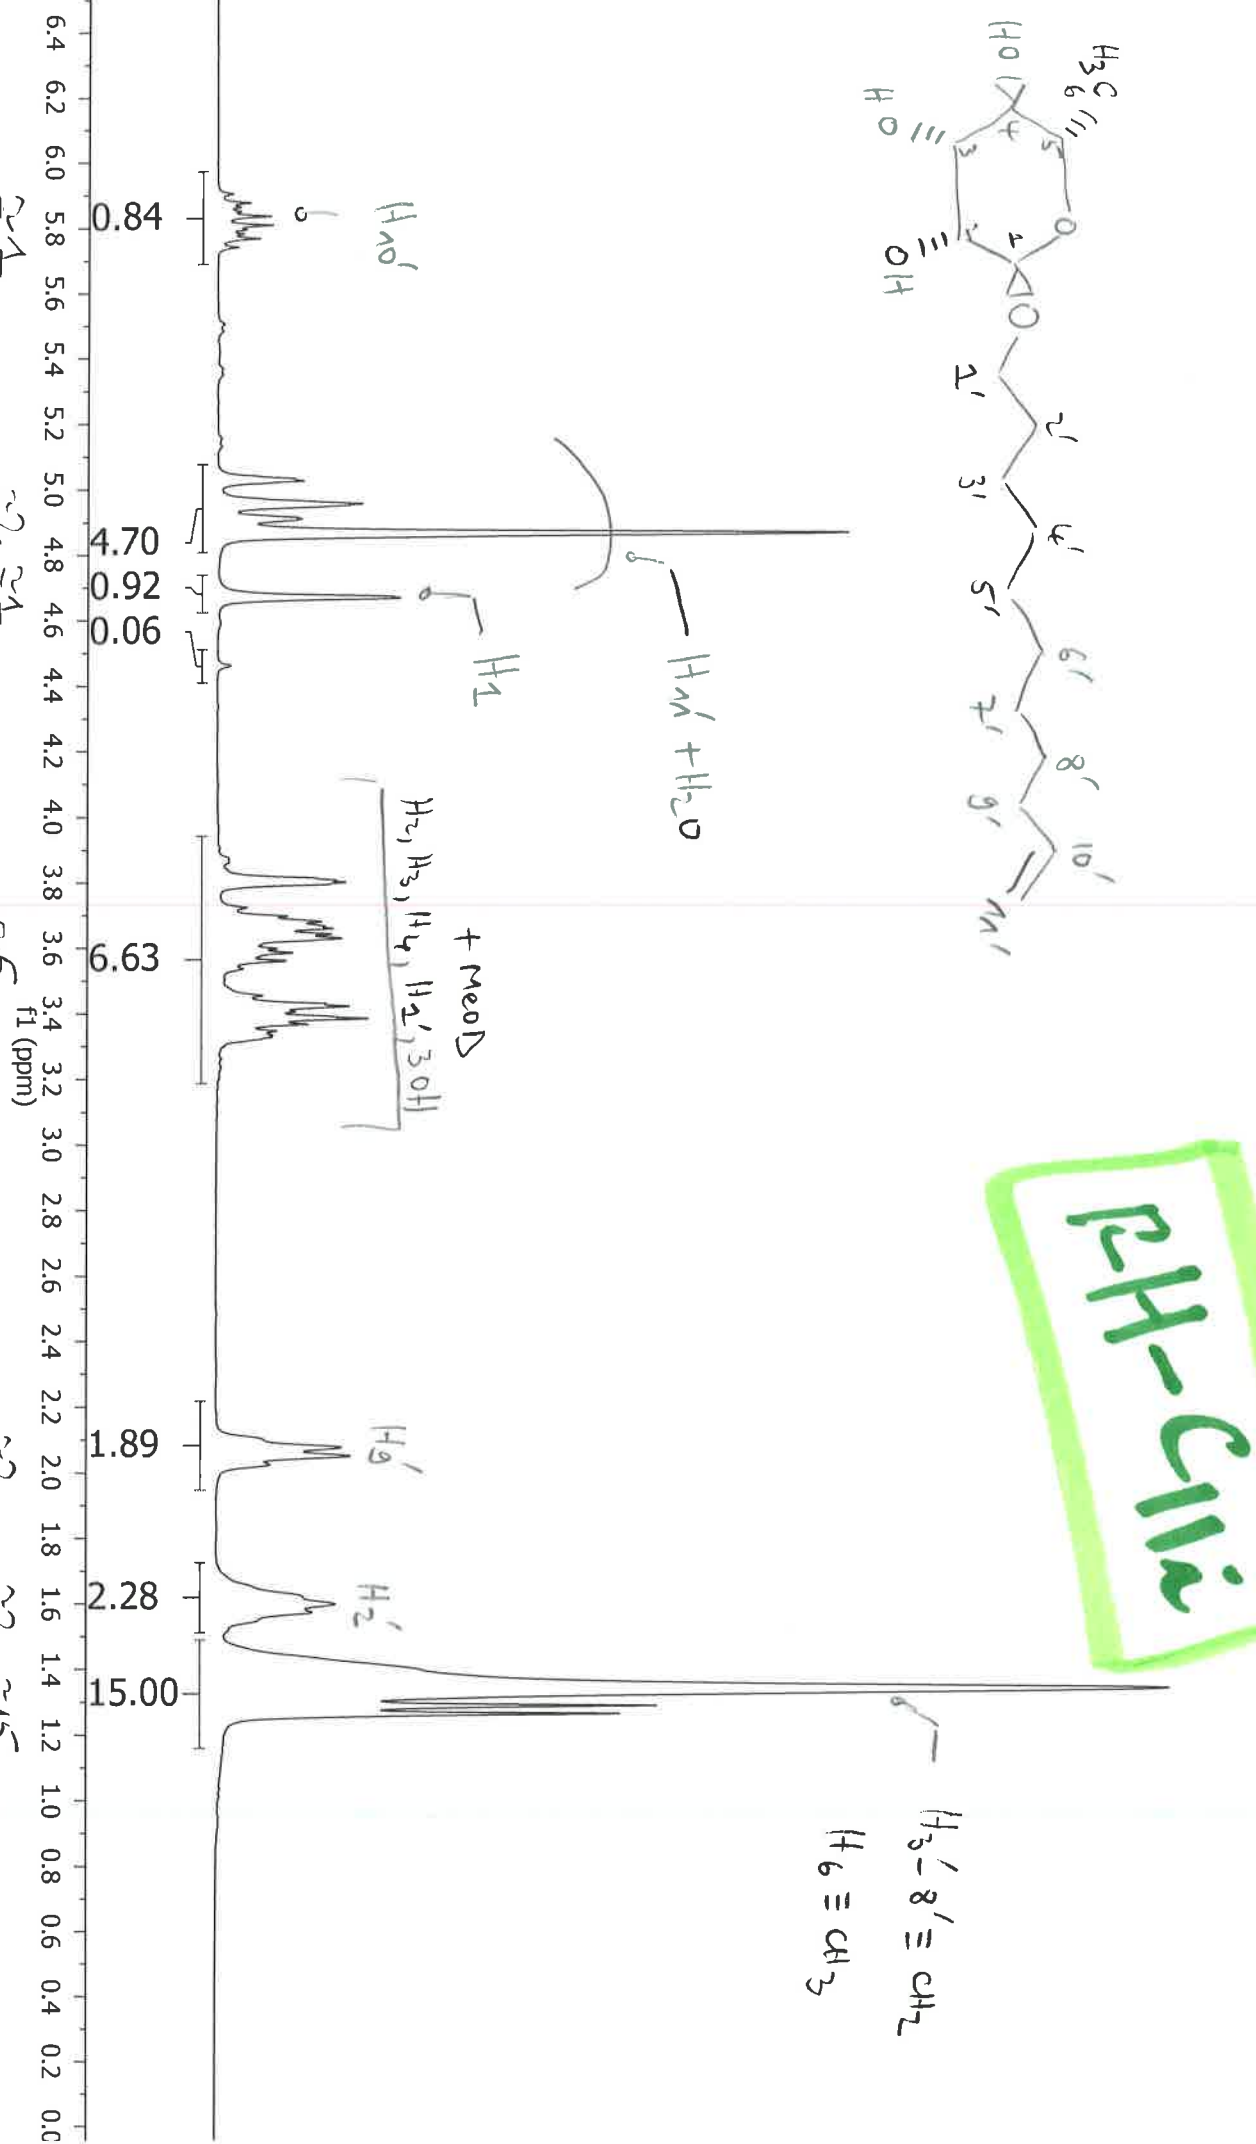

FOA039 Produit brun visqueux obtenu  
après purification sur colonne... il s'agit de  
deuxième tâche.. il est soluble dans le MeOH  
RH-C11i

**RH-C11i**

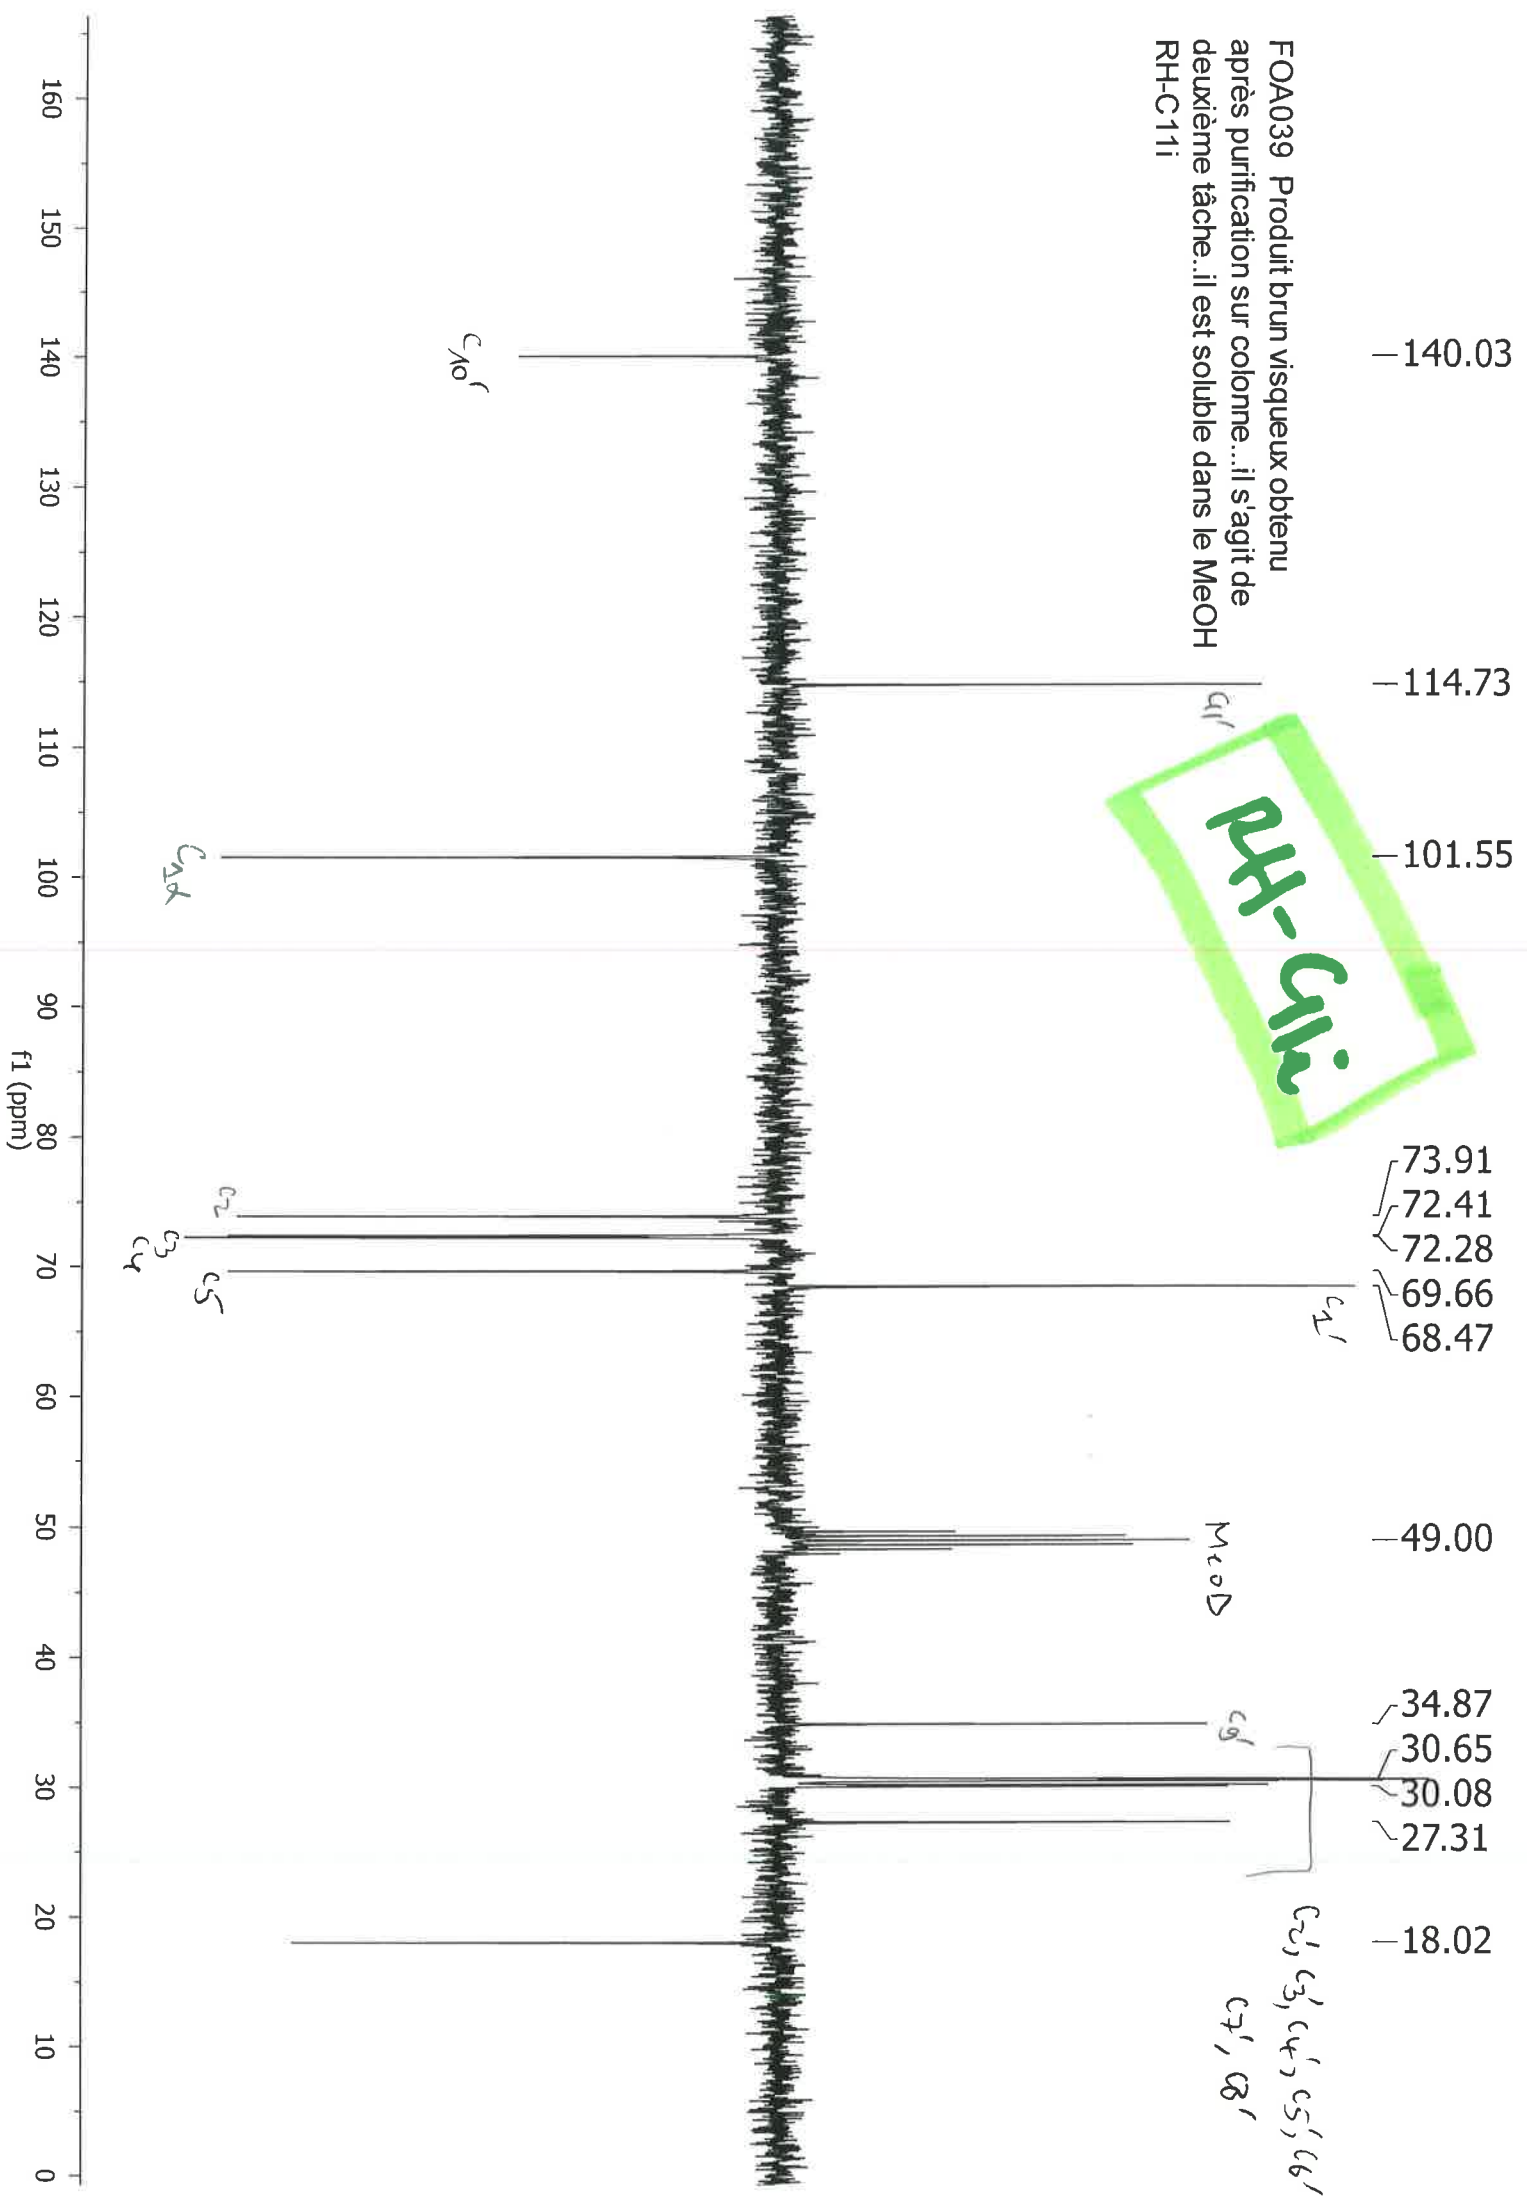

Analyse Administrator  
Date lundi 23 mars 2015 21:10

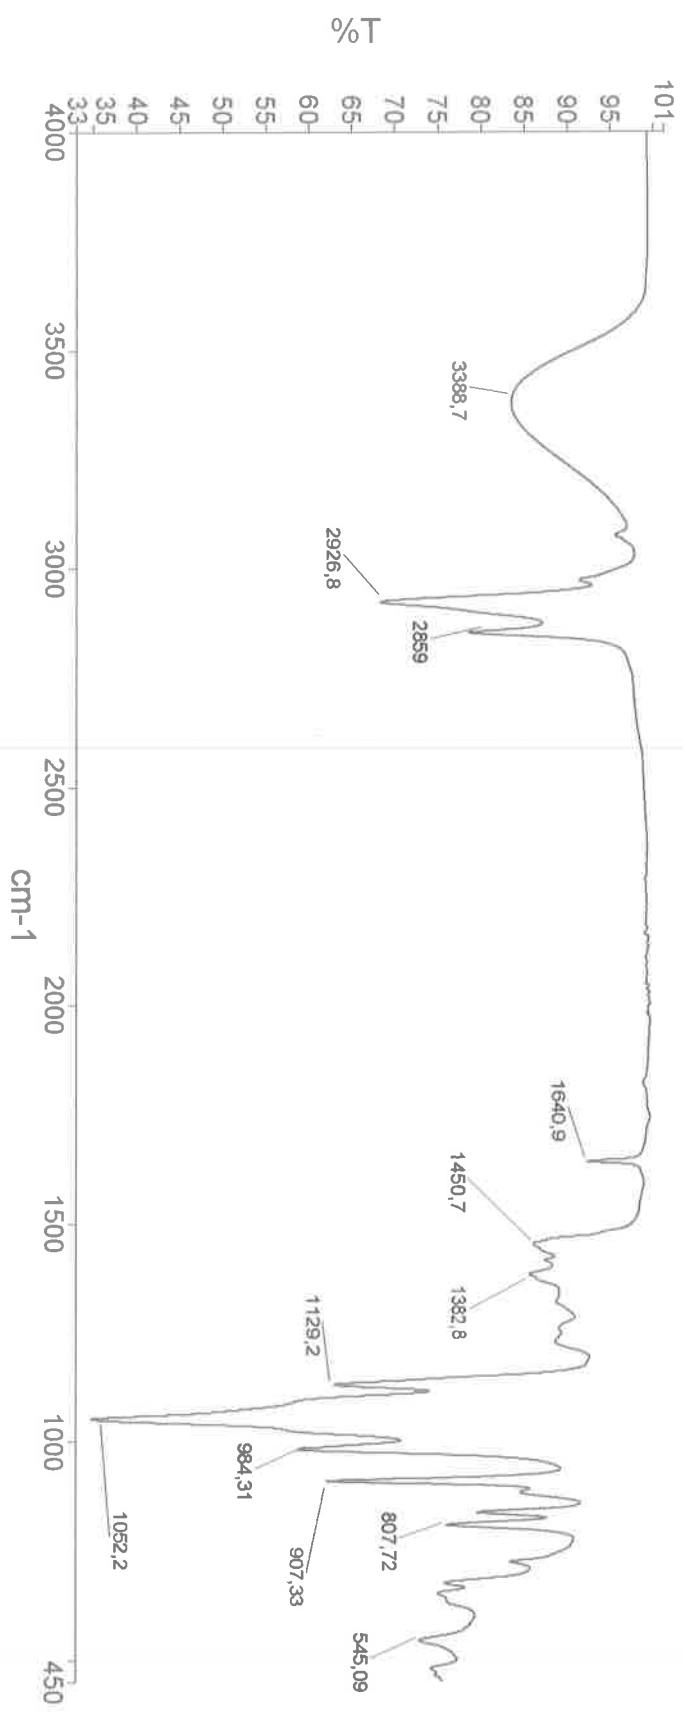

| Nom de l'échantillon | Description                                                      | Trajet Optique (mm) |
|----------------------|------------------------------------------------------------------|---------------------|
| RHC11                | Echantillon 018 Par Administrator Date vendredi, février 27 2015 | 1                   |
