# Supplementary material for: Efficient syntheses of bolaform surfactants froml-rhamnose and/or 3-(4-hydroxyphenyl)propionic acid
Source: Royal Society of Chemistry journal article supplement (doi:10.1039/c5gc00448a), 2015-01-01
Supplement: c5gc00448a16.pdf [file c5gc00448a16.pdf]

FOA046 Produit brun visqueux...RH-C10i-RH... obtenu après purification sur colonne... il est soluble dans le MeOD... il s'agit de la deuxième tâche

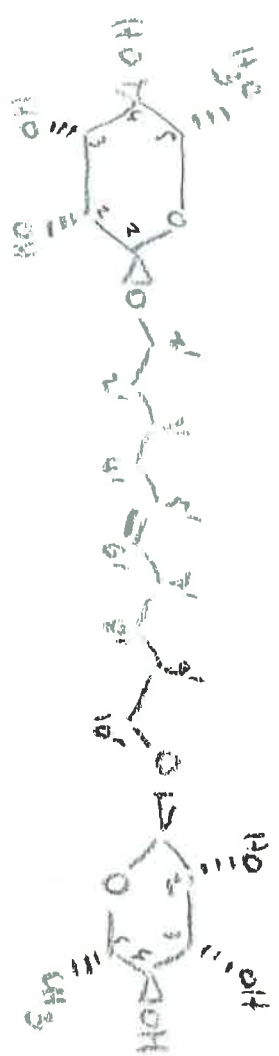

- 5.49
- 5.41
- 4.87
- 4.65
- 4.45
- 3.84
- 3.78
- 3.34
- 2.01
- 1.57
- 1.54
- 1.46
- 1.42
- 1.27
- 1.24

RH-C10i-RH

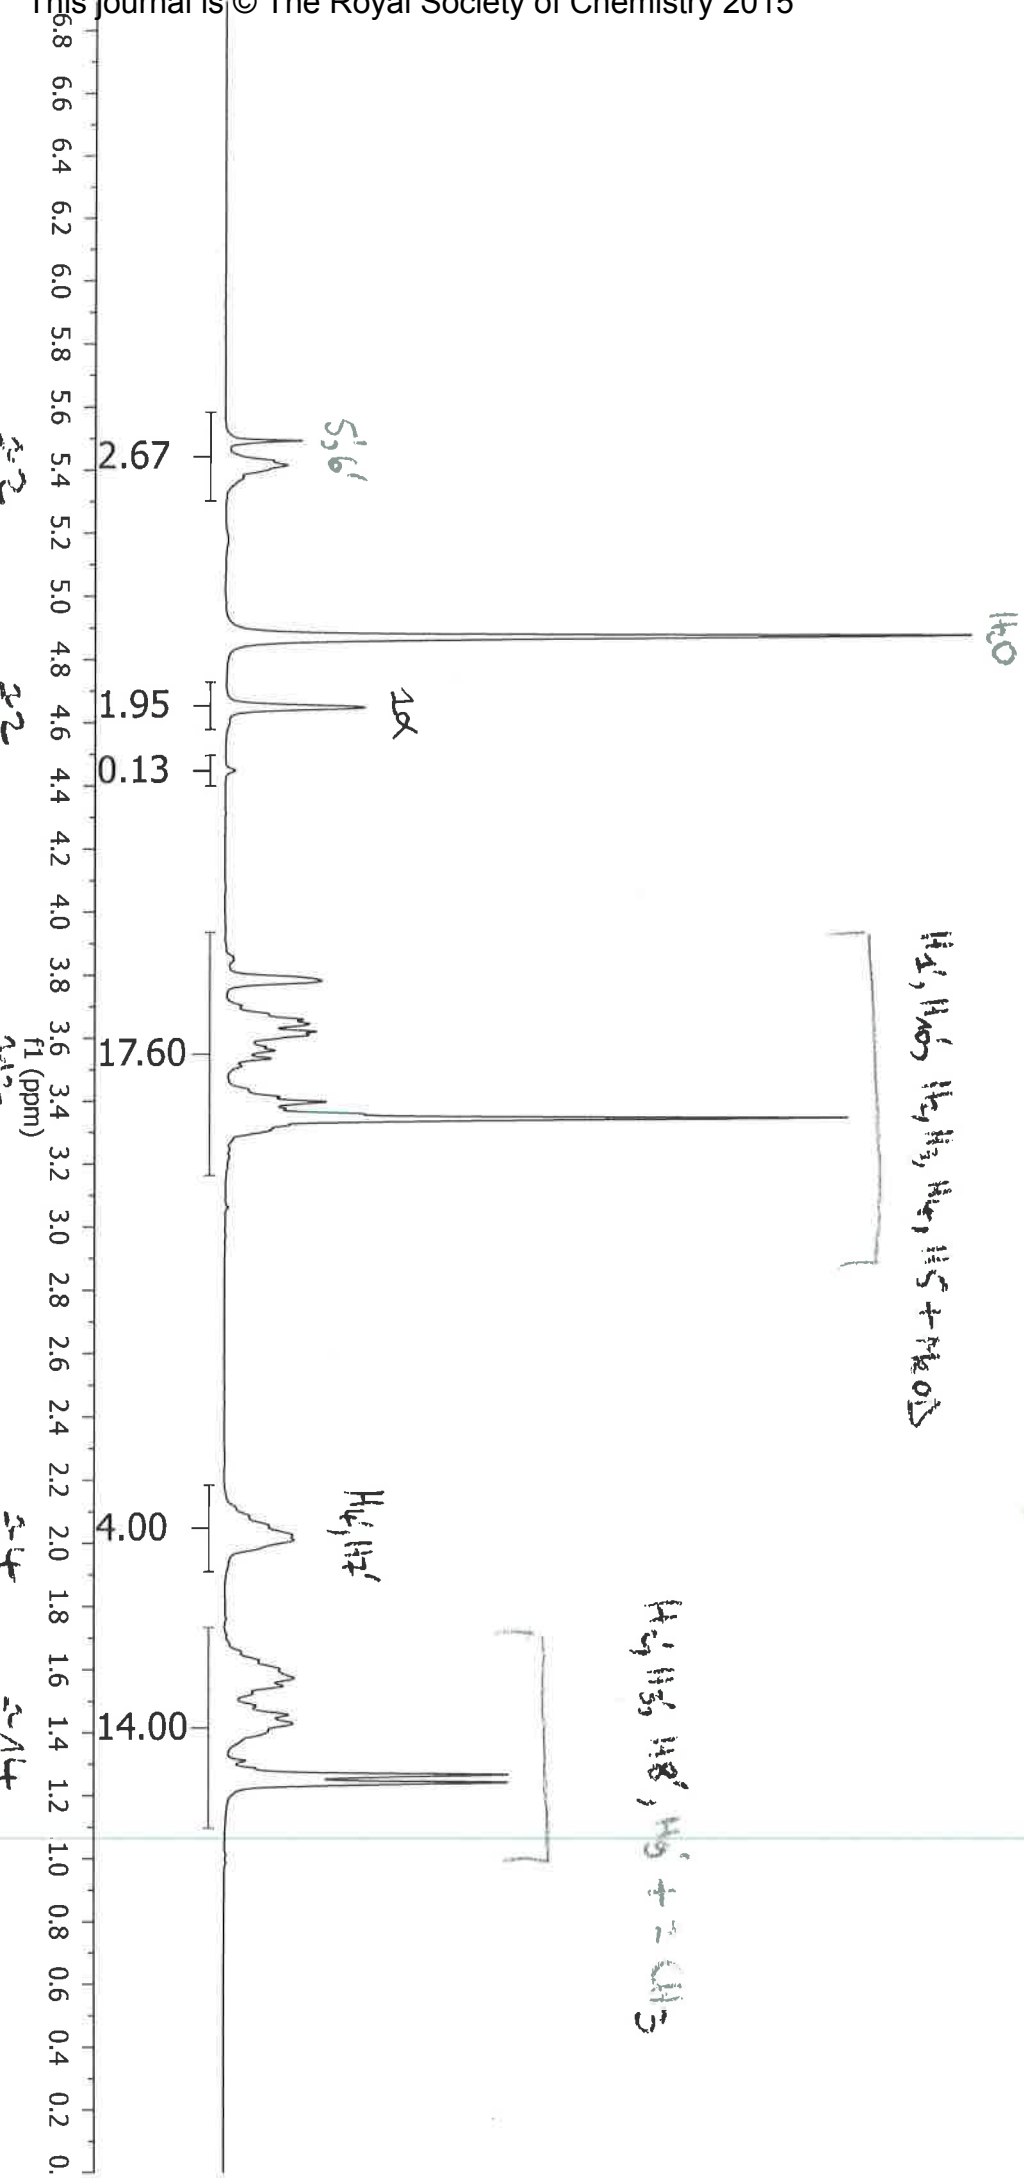

FOA046 Produit brun visqueux...RH-C10i-RH..il est soluble dans le MeOD  
 il forme une résine à sec...RMN 13C

**RH-C10i - RH**

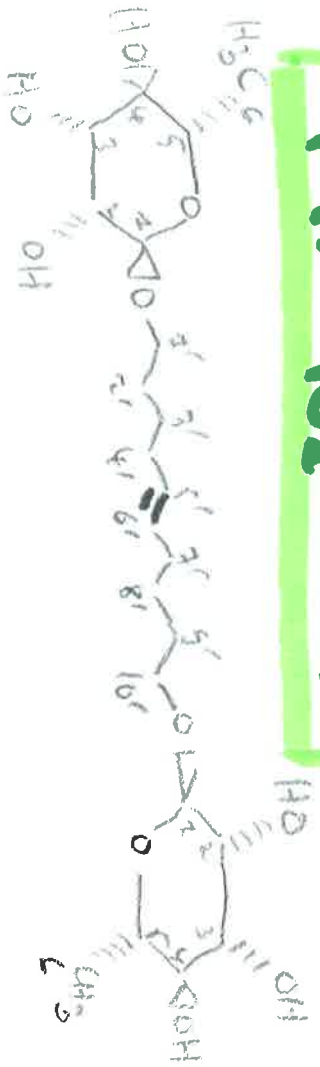

131.46  
 130.80

101.54

73.90  
 72.26  
 69.66  
 68.36

49.00

33.31  
 30.03  
 27.28

18.02

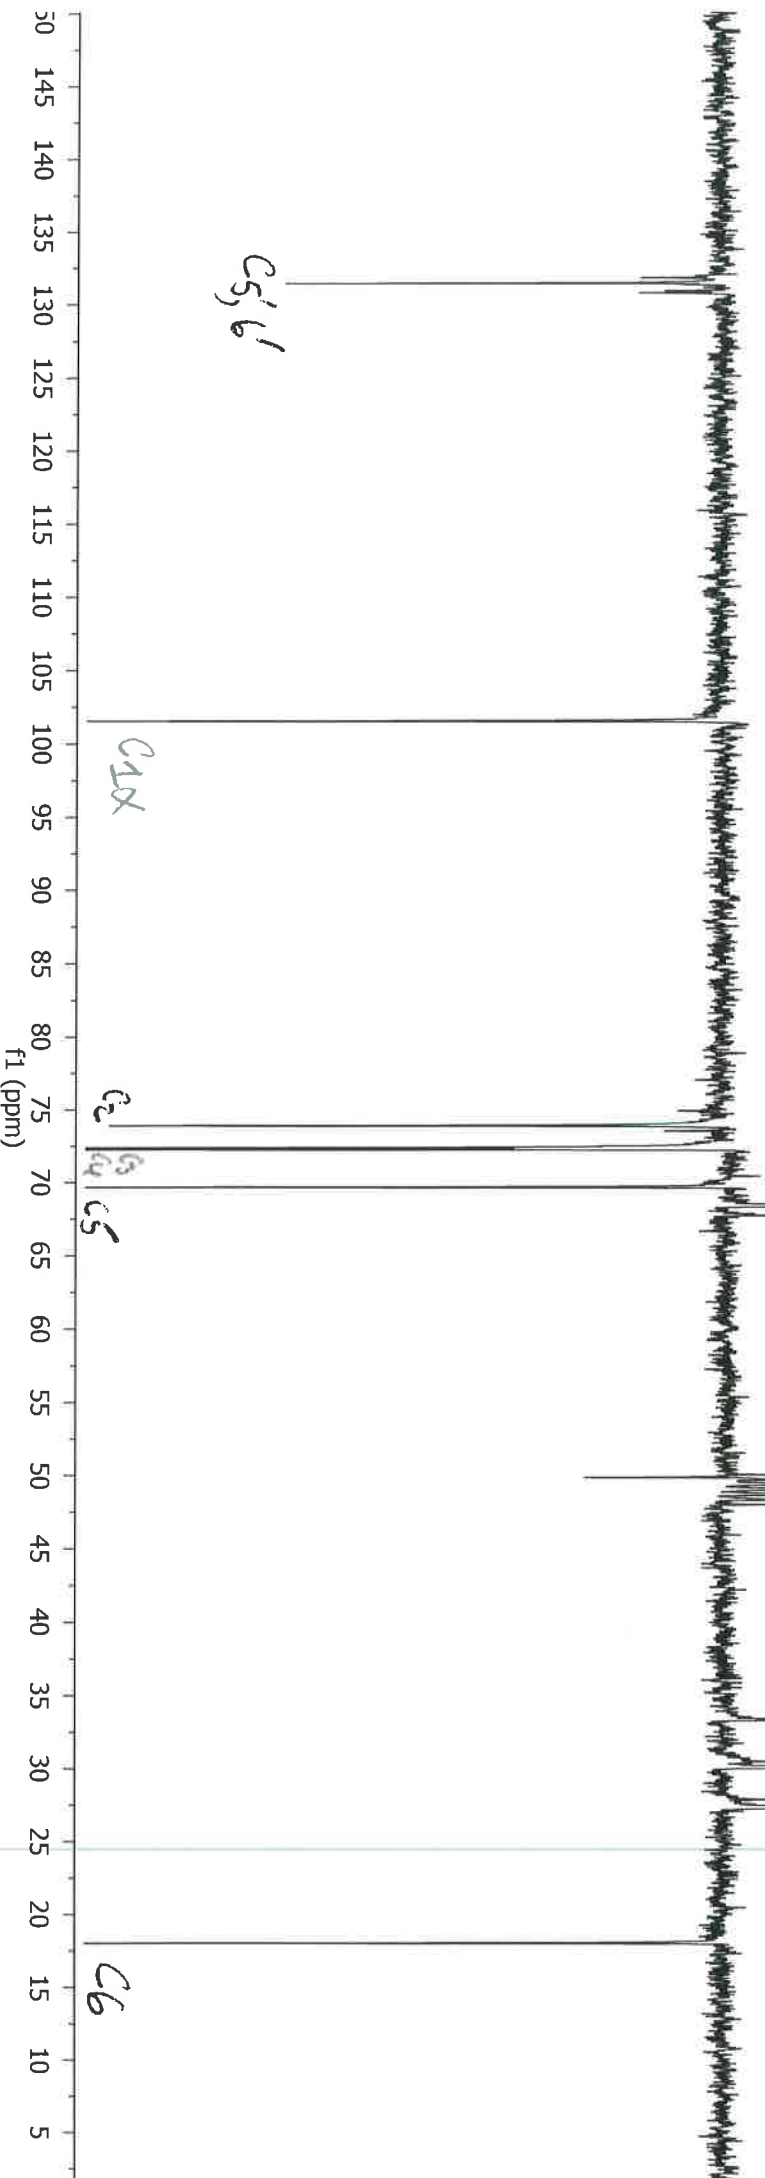

C1,10'

MeOD

C3,4',6',7',8',9'

C5,6'

C10

C2

C3,4'

C6

Analyse Administrator  
Date lundi 23 mars 2015 21:46

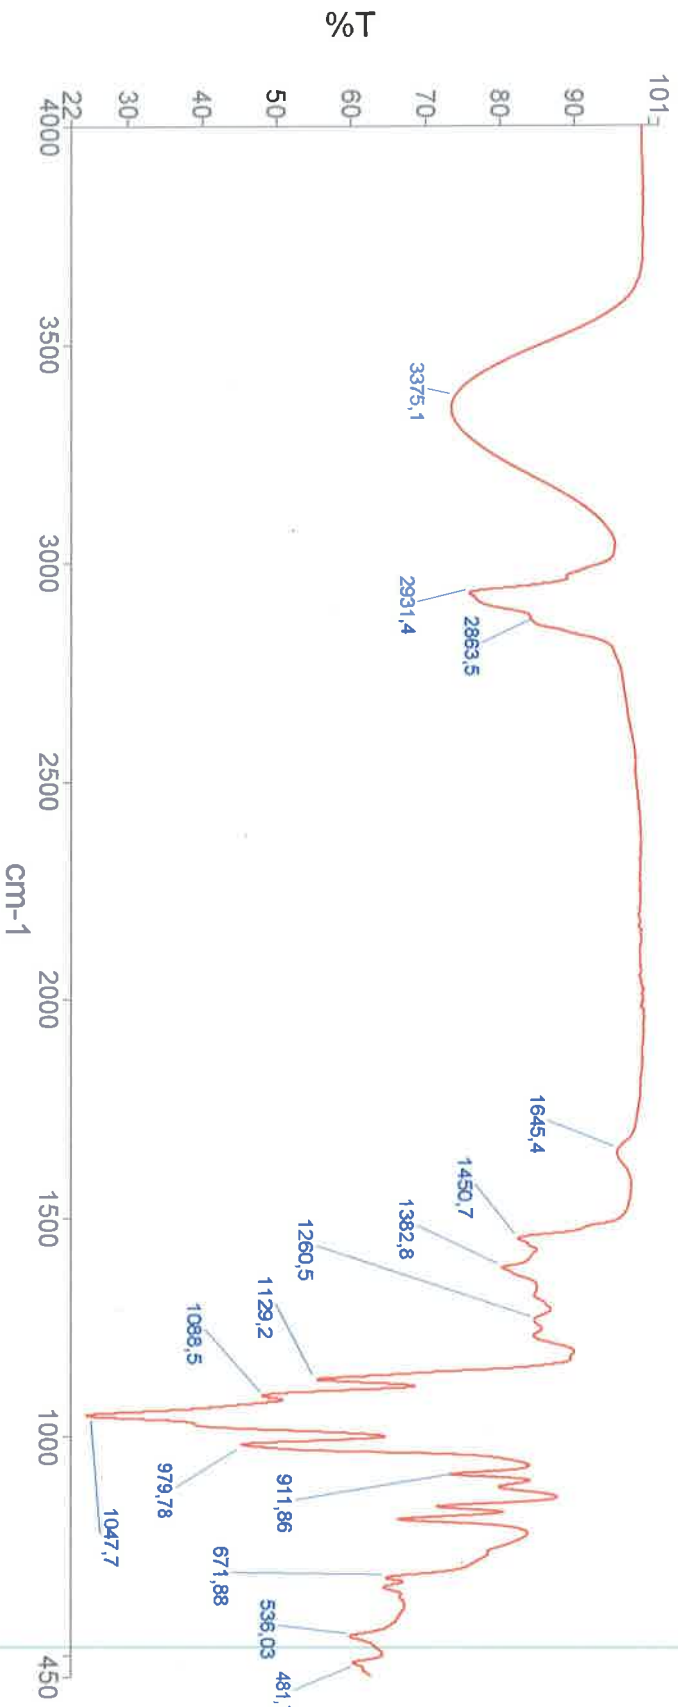

| Nom de l'échantillon | Description                                                | Trajet Optique (mm) |
|----------------------|------------------------------------------------------------|---------------------|
| RHC10IRH             | Echantillon 008 Par Administrator Date lundi, mars 23 2015 | 1                   |
