# Supplementary material for: Efficient syntheses of bolaform surfactants froml-rhamnose and/or 3-(4-hydroxyphenyl)propionic acid
Source: Royal Society of Chemistry journal article supplement (doi:10.1039/c5gc00448a), 2015-01-01
Supplement: c5gc00448a17.pdf [file c5gc00448a17.pdf]

FOA047 Produit brun visqueux obtenu après purification sur colonne... RH-C12i-RH... il est soluble dans le MeOD... RMN 1H

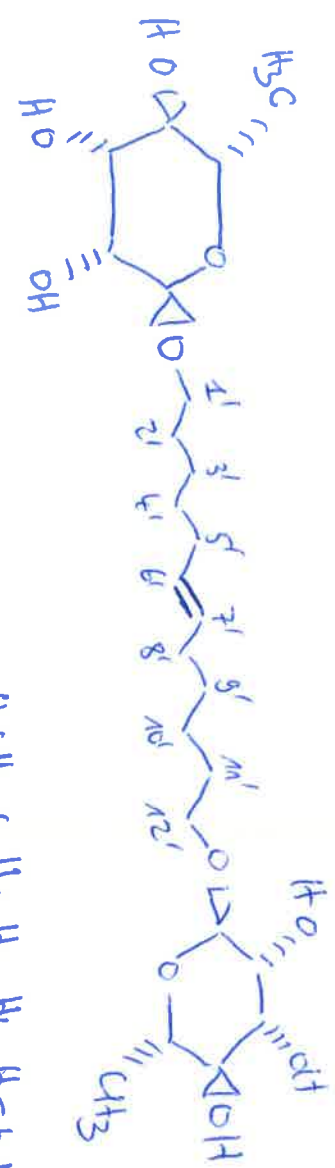

- 5.43
- 4.87
- 4.67
- 4.47
- 3.87
- 3.80
- 3.36
- 2.03
- 1.59
- 1.39
- 1.29
- 1.26

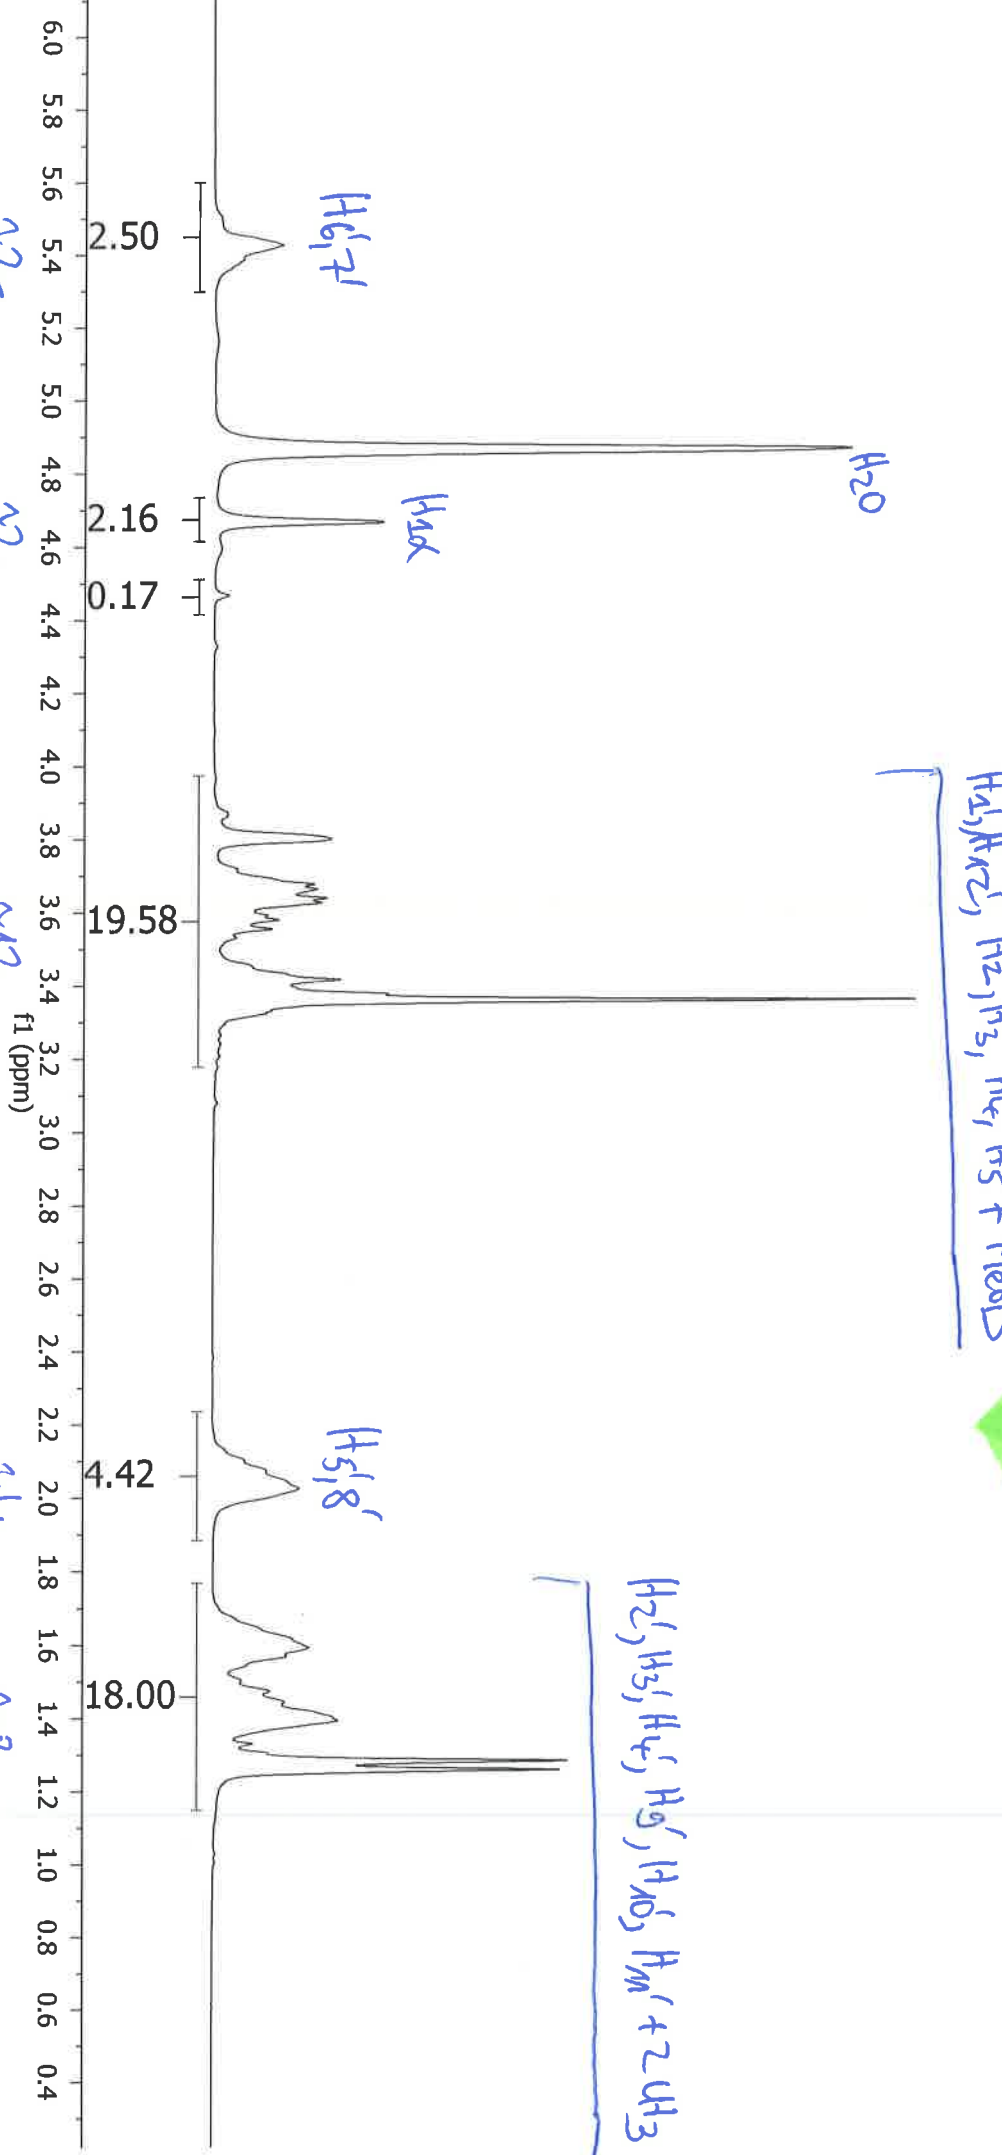

22

22

22

24

28

FOA047 Produit brun visqueux...il est soluble dans le MeOD...RMN 13C

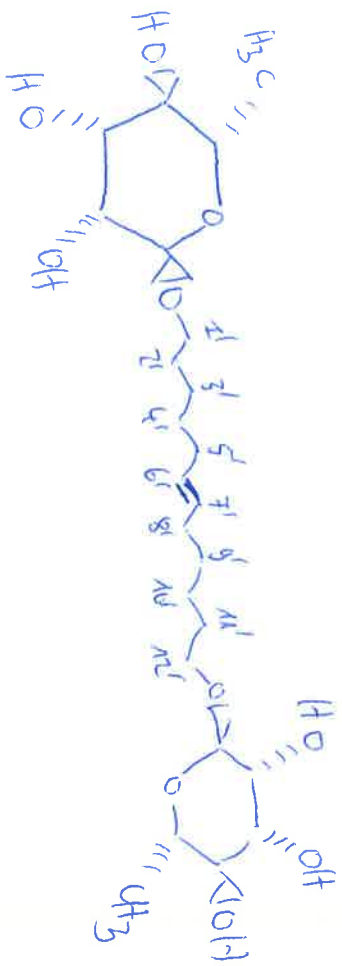

131.46  
130.80

101.53

73.90  
72.26  
69.66  
68.36

49.00

33.30  
30.42  
28.07  
27.28  
26.77  
18.02

**2H-C<sub>2</sub>-2H**

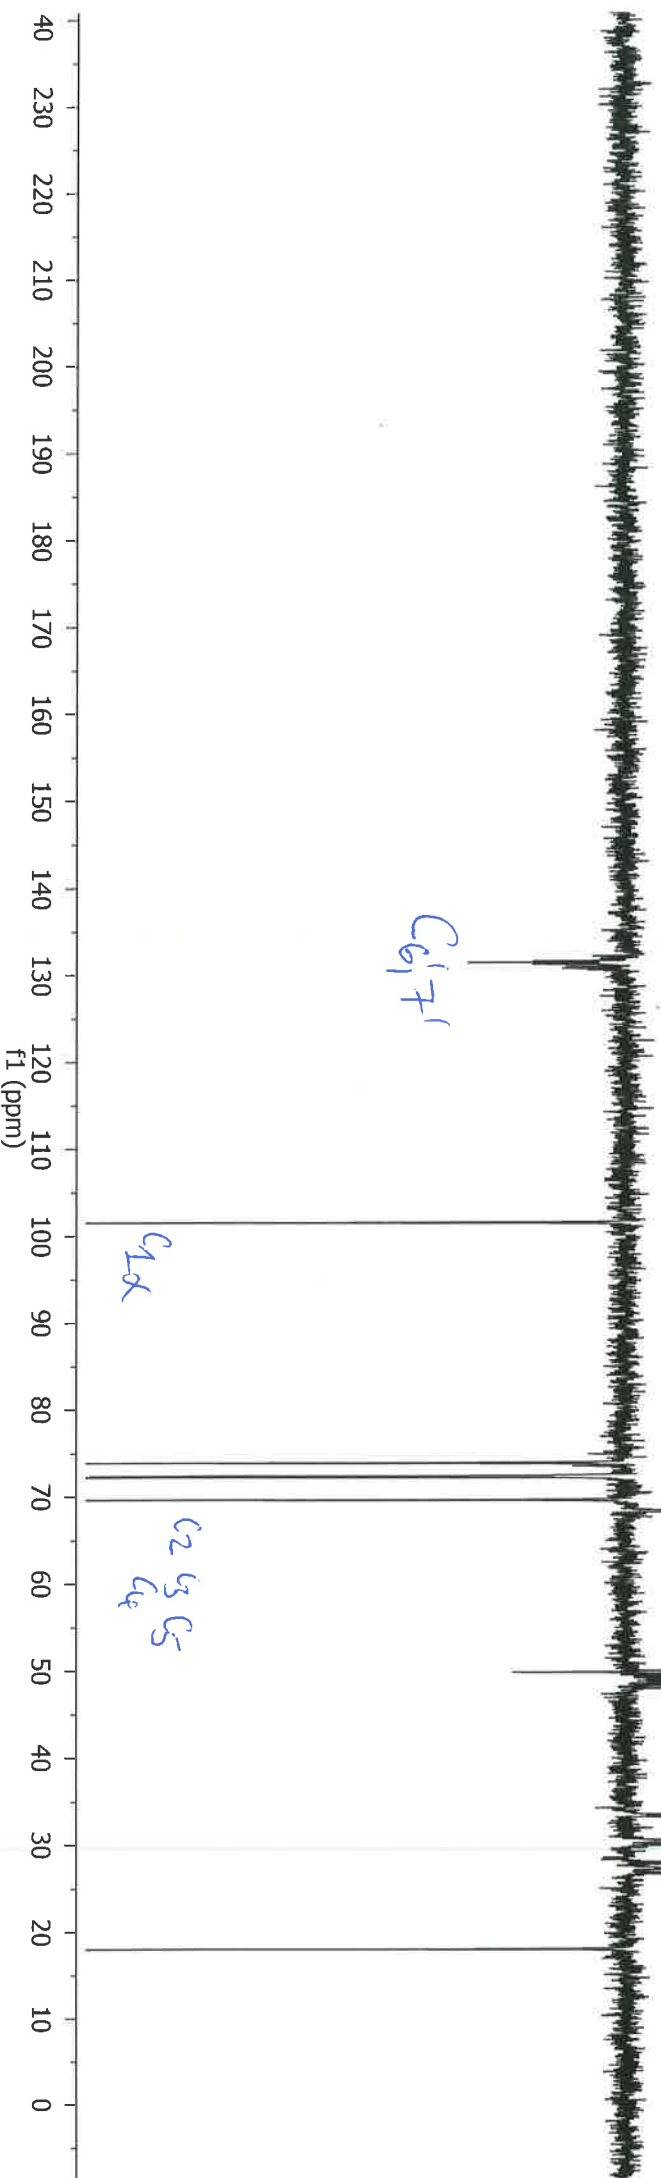

C<sub>6,7,1</sub>

C<sub>1,2</sub>

C<sub>2,3,5,6</sub>

C<sub>1,2,7,8,1</sub> MeOD

C<sub>2,3,4,5,6,8,1,10,11</sub> + 2 CH<sub>3</sub>

Analyste Administrator  
Date lundi 23 mars 2015 21:53

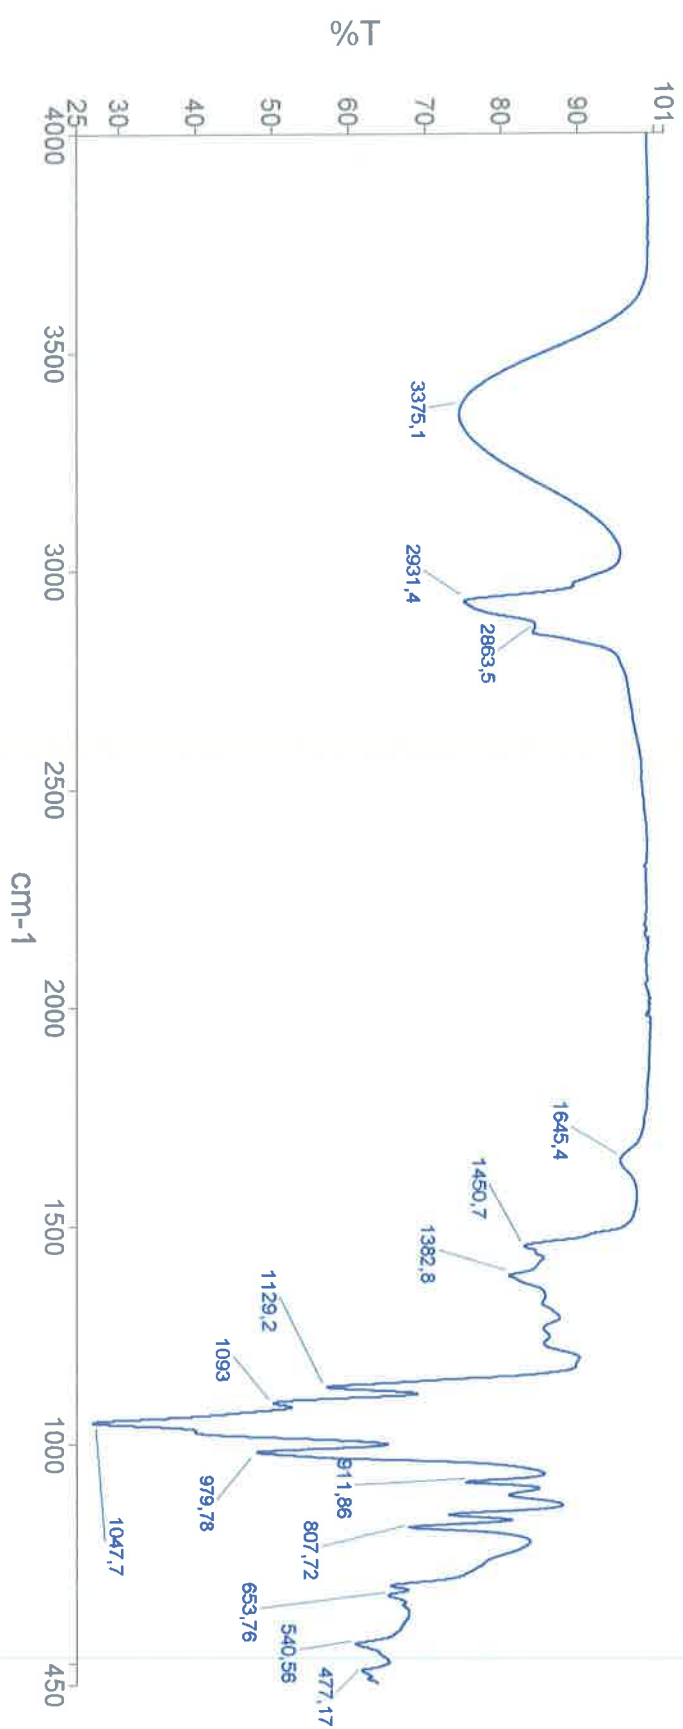

| Nom de l'échantillon | Description                                                | Trajet Optique (mm) |
|----------------------|------------------------------------------------------------|---------------------|
| RHC12RH              | Echantillon 009 Par Administrator Date lundi, mars 23 2015 | 1                   |
