# Supplementary material for: Efficient syntheses of bolaform surfactants froml-rhamnose and/or 3-(4-hydroxyphenyl)propionic acid
Source: Royal Society of Chemistry journal article supplement (doi:10.1039/c5gc00448a), 2015-01-01
Supplement: c5gc00448a18.pdf [file c5gc00448a18.pdf]

FOA048 Produit brun visqueux obtenu après purification sur colonne...il s'agit de la tâche la moins polaire...il est soluble dans le MeOD  
 RH-C14i-RH

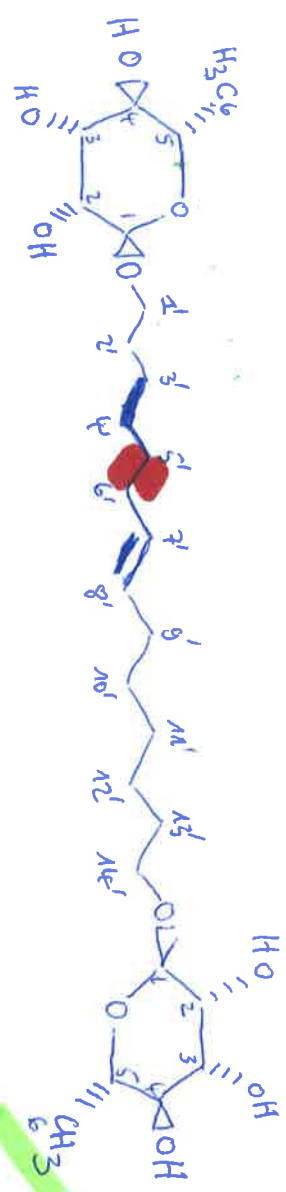

- 5.39
- 4.87
- 4.64
- 4.44
- 3.84
- 3.78
- 3.34
- 3.30
- 1.98
- 1.57
- 1.34
- 1.27
- 1.24

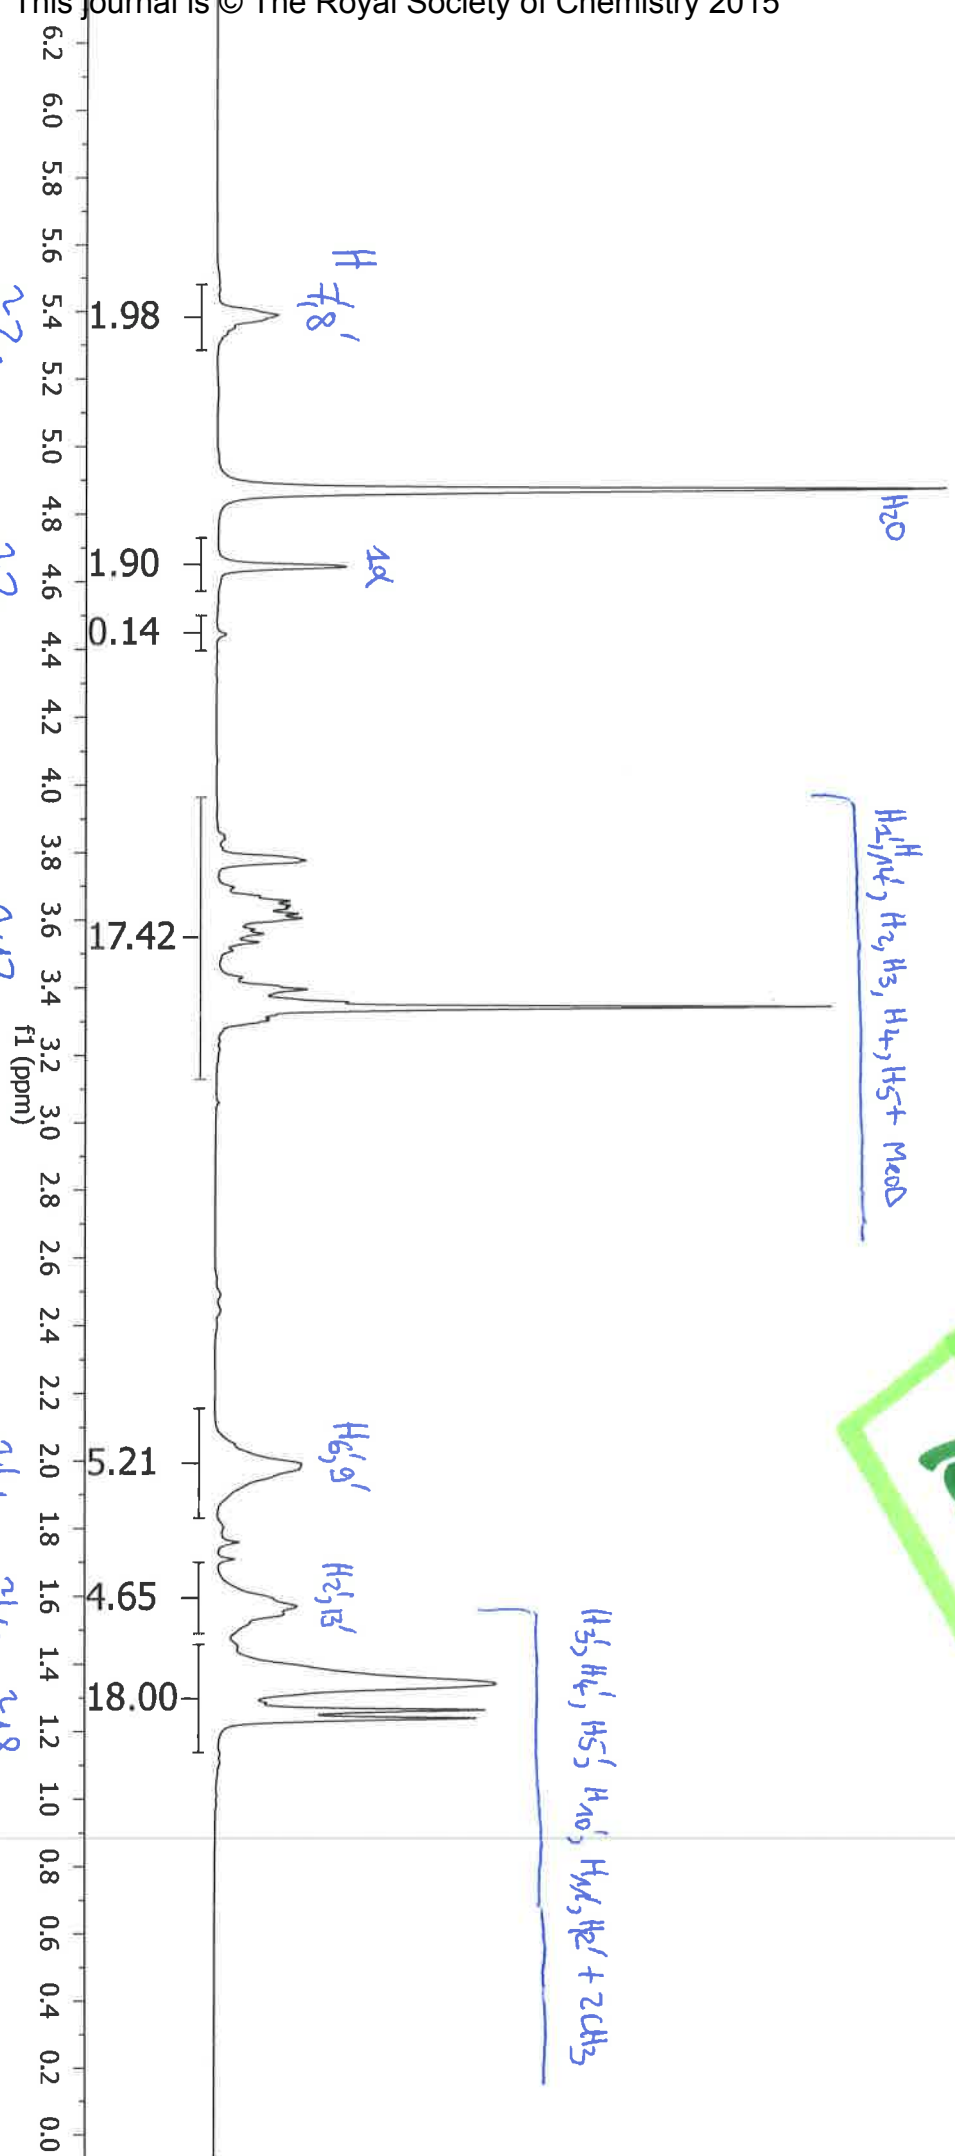

**RH-C14i-RH**

FOA048 Produit brun visqueux...RH-C14I-RH...il est soluble dans le MeOD  
 il forme une résine à sec...RMN 13C

**RH-C14i-RH**

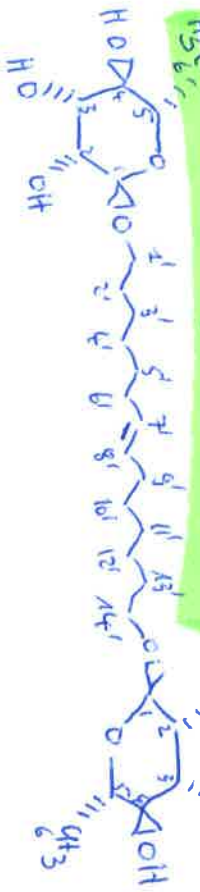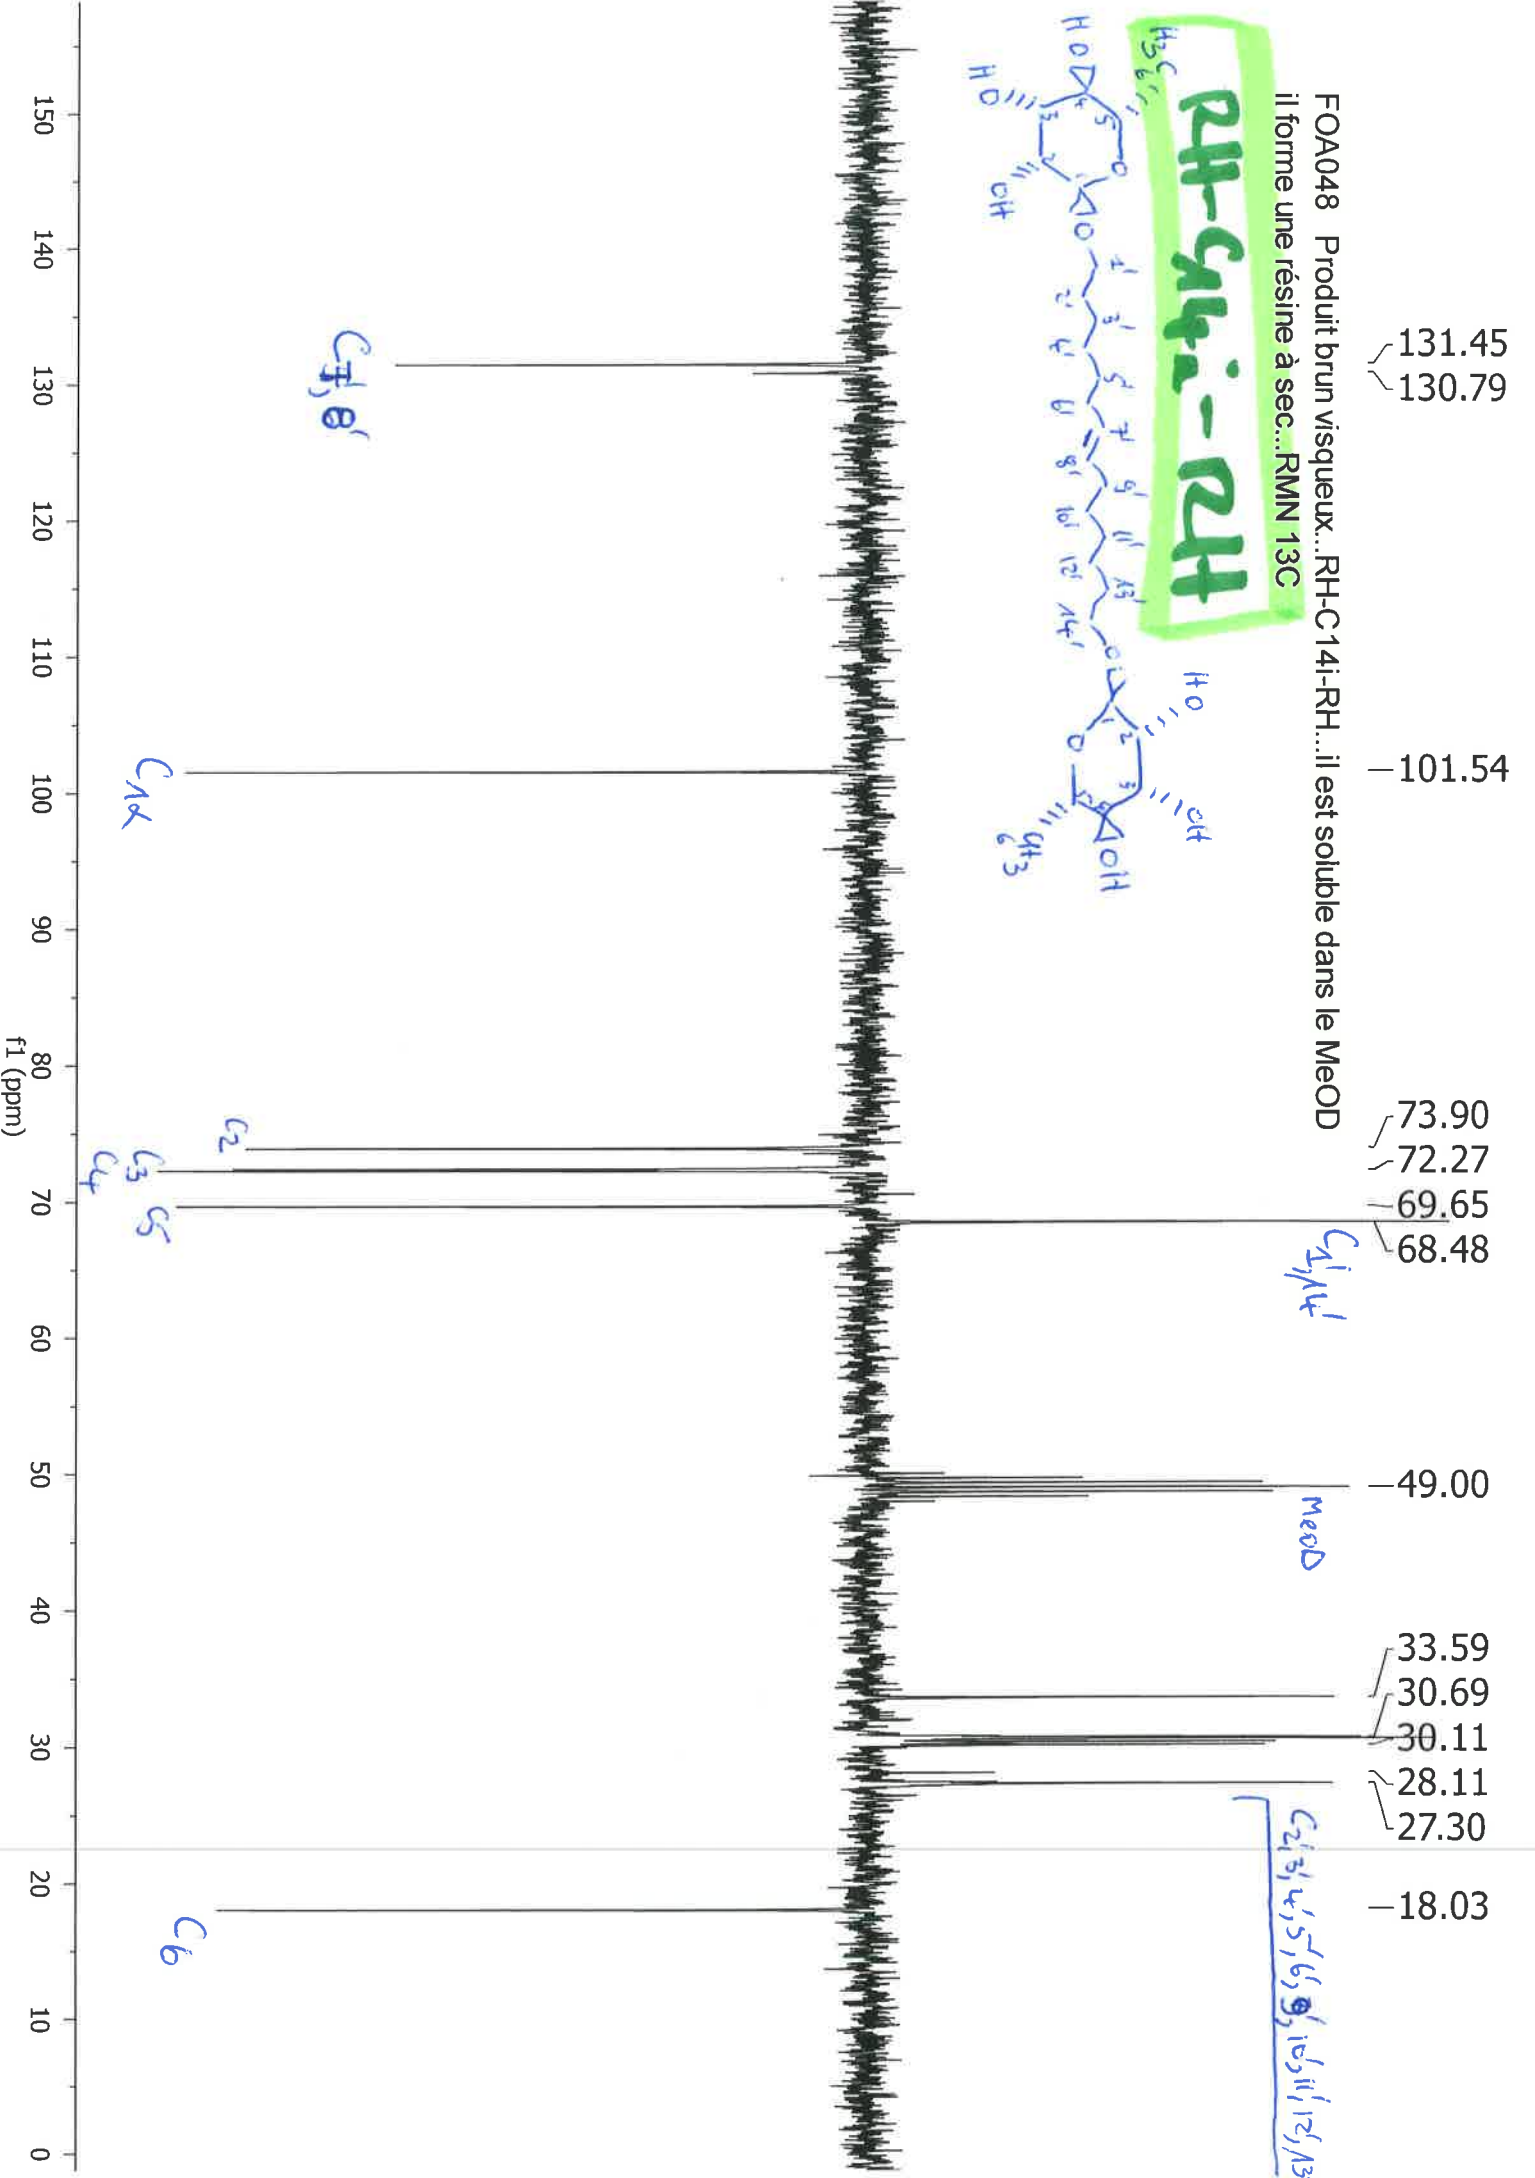

Analyse Administrator  
Date lundi 23 mars 2015 21:58

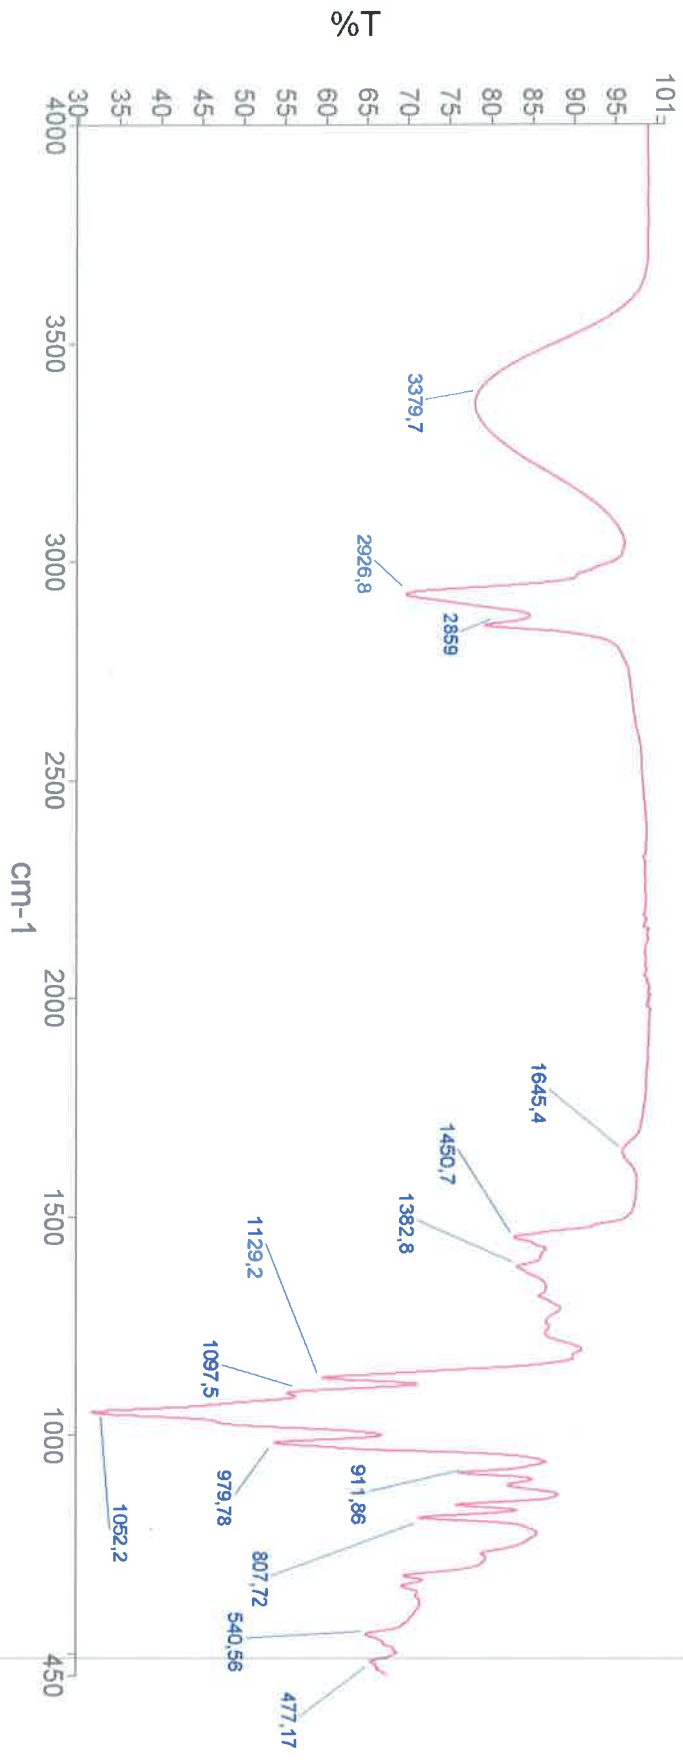

| Nom de l'échantillon | Description                                                | Trajet Optique (mm) |
|----------------------|------------------------------------------------------------|---------------------|
| RHC14iRH             | Echantillon 010 Par Administrator Date lundi, mars 23 2015 | 1                   |
